## Genetic analysis of the Arabidopsis TIR1/AFB auxin receptors reveals both overlapping and specialized functions

Michael J. Prigge<sup>1</sup>, Matthieu Platre<sup>2</sup>, Nikita Kadakia<sup>1,†</sup>, Yi Zhang<sup>1,‡</sup>, Kathleen Greenham<sup>1,§</sup>, Whitney Szutu<sup>1</sup>, Bipin K. Pandey<sup>3</sup>, Rahul Bhosale<sup>3</sup>, Malcolm J. Bennett<sup>3</sup>, Wolfgang Busch<sup>2</sup>, and Mark Estelle<sup>1,\*</sup>

<sup>1</sup> Section of Cell and Developmental Biology, University of California San Diego, La Jolla, CA 92093-0116, USA

<sup>2</sup> Plant Molecular and Cellular Biology Laboratory, and Integrative Biology Laboratory, Salk Institute for Biological Studies, 10010 N Torrey Pines Road, La Jolla, CA, 92037, USA

<sup>3</sup> Plant and Crop Sciences, School of Biosciences, University of Nottingham, UK

<sup>†</sup> Current address: University of California, Riverside, School of Medicine, Riverside, CA, USA

<sup>‡</sup> Department of Human Genetics, University of California Los Angeles, Los Angeles, CA 90095-7088, USA

<sup>§</sup> Current address: Department of Plant and Microbial Biology, University of Minnesota, Saint Paul, MN, 55108, USA

\* For correspondence: [mestelle@ucsd.edu](mailto:mestelle@ucsd.edu)

[orcid.org/0000-0003-0671-2538](https://orcid.org/0000-0003-0671-2538) (MJP)

[orcid.org/0000-0002-4934-3050](https://orcid.org/0000-0002-4934-3050) (MP)

[orcid.org/0000-0002-1884-1671](https://orcid.org/0000-0002-1884-1671) (NK)

[orcid.org/0000-0001-7681-5263](https://orcid.org/0000-0001-7681-5263) (KG)

[orcid.org/0000-0002-2083-7241](https://orcid.org/0000-0002-2083-7241) (WS)

[orcid.org/0000-0002-9614-1347](https://orcid.org/0000-0002-9614-1347) (BKP)

[orcid.org/0000-0001-6515-4922](https://orcid.org/0000-0001-6515-4922) (RB)

[orcid.org/0000-0003-0475-390X](https://orcid.org/0000-0003-0475-390X) (MJB)

[orcid.org/0000-0003-2042-7290](https://orcid.org/0000-0003-2042-7290) (WB)

[orcid.org/0000-0002-2613-8652](https://orcid.org/0000-0002-2613-8652) (ME)

## 1 **ABSTRACT**

2 The TIR1/AFB auxin co-receptors mediate diverse responses to the plant hormone  
3 auxin. The Arabidopsis genome encodes six TIR1/AFB proteins representing three of  
4 the four clades that were established prior to angiosperm radiation. To determine the  
5 role of these proteins in plant development we performed an extensive genetic analysis  
6 involving the generation and characterization of all possible multiply mutant lines. We  
7 find that loss of all six TIR1/AFB proteins results in defects in embryogenesis as early  
8 as the 8-cell stage, and possibly earlier. Mutant embryos progress but exhibit frequent  
9 cell division errors followed by proliferation of the suspensor, and eventually seed  
10 abortion. Despite this dramatic phenotype, a single wild-type allele of *TIR1* or *AFB2* is  
11 sufficient to support growth throughout plant development. Further, gametophytic  
12 expression of the *TIR1/AFB* genes is not essential for development of the male or  
13 female gametophyte. Our analysis reveals extensive functional overlap between even  
14 the most distantly related *TIR1/AFB* genes except for *AFB1*. Surprisingly, the *AFB1*  
15 protein has a specialized function in rapid auxin-dependent inhibition of root growth and  
16 early phase of root gravitropism. This activity may be related to a difference in  
17 subcellular localization compared to the other members of the family.

18

## 19 **INTRODUCTION**

20 The phytohormone auxin regulates diverse processes throughout the entire plant life  
21 cycle. Auxin acts as a signal to promote cell differentiation during morphogenetic events  
22 such as embryogenesis, root development, and shoot organ formation. Auxin also  
23 mediates responses to environmental cues such as light, gravity, water availability, and

24 pathogens. Auxin regulation of transcription involves three families of proteins; AUXIN  
25 RESPONSE FACTOR (ARF) transcription factors, Aux/IAA transcriptional repressors,  
26 and TRANSPORT INHIBITOR RESPONSE1 (TIR1)/AUXIN-SIGNALING F-BOX (AFB)  
27 proteins. Auxins, of which indole-3-acetic acid (IAA) is the predominant natural form, are  
28 perceived by a co-receptor complex consisting of TIR1/AFB and Aux/IAA proteins.  
29 Formation of the co-receptor complex leads to degradation of the Aux/IAA protein and  
30 activation of ARF-dependent transcription (Reviewed in (Lavy and Estelle 2016). In  
31 addition to this established pathway, recent studies demonstrate that the TIR1/AFB  
32 proteins are required for very rapid auxin responses in the root and in developing root  
33 hairs that are independent of transcription (Dindas et al. 2018; Fendrych et al. 2018).  
34 The details of TIR1/AFB function in these rapid responses are currently unknown, but in  
35 the root, the response is thought to be important for early events in gravitropism.  
36  
37 Members of the TIR1/AFB protein family are encoded by three pairs of paralogs in the  
38 *Arabidopsis* genome. Each protein contains an amino-terminal F-Box followed by  
39 eighteen leucine-rich repeats (LRRs). Only *tir1*, *afb2*, and *afb5* mutants have been  
40 identified in forward-genetic screens (Ruegger et al. 1997; Ruegger et al. 1998; Alonso  
41 et al. 2003; Walsh et al. 2006; Parry et al. 2009), but reverse-genetic analyses revealed  
42 functional redundancies between *TIR1*, *AFB2*, and *AFB3* as well as between *AFB4* and  
43 *AFB5* (Dharmasiri et al. 2005; Prigge et al. 2016).  
44  
45 Gene duplication events provide the primary source material for the evolution of  
46 biological innovation. In plants, whole genome duplication (WGD) events have been

47 especially important with events preceding the radiation of several key plant lineages  
48 including seed plants, flowering plants, and core eudicots (Jaillon et al. 2007; Jiao et al.  
49 2011; Clark and Donoghue 2018). Following duplication, the paralogs are often  
50 redundant, allowing one copy to degenerate into a pseudogene (Lynch and Conery  
51 2000). In *Arabidopsis*, the average half-life of a duplicate gene has been estimated at  
52 17.3 million years (Lynch and Conery 2003). In many cases, however, both duplicates  
53 are retained for one or a combination of reasons (reviewed in (Panchy et al. 2016).  
54 Occasionally, one of the paralogs evolves a novel function (neofunctionalization), but  
55 often the two paralogs fulfill different aspects (enzymatically, temporally, or spatially) of  
56 the role of the ancestral gene (subfunctionalization). Following subfunctionalization,  
57 there may be changes in selective pressure allowing each paralog to evolve specialized  
58 functions without affecting functions carried out by the other paralog. This mechanism  
59 likely played a prominent role in the evolution of plant gene families and, in turn, in the  
60 radiation and diversification of land plants.

61

62 The *TIR1/AFB*, *Aux/IAA*, and *ARF* gene families expanded during land plant evolution  
63 after the divergence of bryophytes and vascular plants (Remington et al. 2004; Rensing  
64 et al. 2008; Mutte et al. 2018). Because auxin has a central role in many important  
65 adaptations that occurred during land plant evolution, such as vascular development,  
66 lateral root formation, and organ polarity; it seems likely that the acquisition of new roles  
67 for auxin was enabled by the duplication and diversification of these three gene families.  
68 Here we present the comprehensive genetic analysis of the *TIR1/AFB* gene family of  
69 *Arabidopsis* which revealed extensive functional overlap between even distantly related

70 members as well as an essential role for the TIR1/AFB pathway in early embryos. In  
71 contrast the AFB1 protein appears to have adopted a special role in a rapid auxin  
72 response in the root.

## 73 **RESULTS**

### 74 **Major lineages of auxin receptors diverged prior to the fern–seed plant split**

75 To better understand the timeframe during which the auxin receptor family diversified,  
76 we built upon previous phylogenetic analyses (Parry et al. 2009; Mutte et al. 2018) with  
77 more taxon sampling at key nodes. As shown earlier (Hori et al. 2014; Mutte et al.  
78 2018), the *TIR1/AFB* genes likely evolved from a gene encoding an F-Box/LRR protein  
79 similar to those present in the genomes of extant streptophyte algae. These algal  
80 proteins form a sister clade to three distinct land plant F-Box families, the TIR1/AFB  
81 auxin receptors, the COI1 jasmonate-Ile (or dinor-OPDA) receptors, and the ‘XFB’ clade  
82 of unknown function conserved in the genomes of mosses and some lycophytes but not  
83 in other land plants (Prigge et al. 2010; Bowman et al. 2018). While the last common  
84 ancestors of land plants and of vascular plants had only one *TIR1/AFB* gene, three  
85 clades of auxin receptors were established prior to the radiation of euphyllophytes (ferns  
86 plus seed plants) over 400 million years ago (Morris et al. 2018) (Figure 1—figure  
87 supplement 1A). Another gene duplication event prior to angiosperm radiation split the  
88 TIR1/AFB1 clade from the AFB2/AFB3 clade. Receptors from each of the four clades  
89 are not retained in the genome of every flowering plant. For example, *AFB6* orthologs  
90 are not present in the genomes of core Brassicales species—including *Arabidopsis*—  
91 nor those of Poaceae species including rice and maize. The gene duplication event  
92 establishing the distinct TIR1 and AFB1 clades is coincident with the At- $\beta$  WGD event at

93 the base of Brassicales, while both the AFB2/AFB3 and the AFB4/AFB5 duplication  
94 events coincide with the more recent At- $\alpha$  WGD prior to divergence of the Brassicaceae  
95 family (Figure 1—figure supplement 1A) (Schranz and Mitchell-Olds 2006).

96

97 One noteworthy aspect of the phylogenetic tree is the pronounced branch-length  
98 asymmetry within the TIR1+AFB1 clade (Figure 1—figure supplement 1). Since the last  
99 common ancestor of *Arabidopsis* (Brassicaceae) and *Tarenaya* (Cleomaceae), the  
100 *AFB1* gene has accumulated over three times as many non-synonymous changes as  
101 *TIR1* (Figure 1—figure supplement 1B) despite being under selection based on the ratio  
102 of non-synonymous and synonymous substitutions (Delker et al. 2010; Wright et al.  
103 2017). AFB1 also differs from the other TIR1/AFBs in that it contains two of three  
104 substitutions in the first  $\alpha$ -helix of the F-Box that were each previously shown to weaken  
105 TIR1's interaction with CUL1 (Yu et al. 2015). The substitution with the largest effect,  
106 Glu8Lys (equivalent to Glu12Lys in TIR1), appeared shortly after the At- $\beta$  WGD that  
107 produced AFB1, and the Phe14Leu substitution appeared prior to the crown group of  
108 the Brassicaceae family (Figure 1—figure supplement 1C). Interestingly, *AFB1*  
109 orthologs from members of the *Camelina* genus—*C. sativa* (all three homeologs), *C.*  
110 *laxa*, *C. hispida*, and *C. rumelica*—additionally contain the third substitution (Figure 1—  
111 figure supplement 1C).

112

113 **Genetic analysis of the *Arabidopsis TIR1/AFB* gene family revealed extensive**  
114 **functional overlap**

115 Previous studies have assessed the functional overlap between the *TIR1*, *AFB1*, *AFB2*  
116 and *AFB3* genes (Dharmasiri et al. 2005; Parry et al. 2009) and separately between the  
117 *AFB4* and *AFB5* genes (Prigge et al. 2016). To study the genetic interactions between  
118 all members of the family, and to determine the effects of the complete absence of  
119 *TIR1/AFB*-mediated auxin signaling, lines with strong loss-of-function mutations in the  
120 six *TIR1/AFB* genes were intercrossed to generate all sixty-three mutant combinations.  
121 We used the following alleles *tir1-1*, *afb1-3*, *afb2-3*, *afb3-4*, *afb4-8*, and *afb5-5* (Figure  
122 1—figure supplement 2A; (Ruegger et al. 1998; Parry et al. 2009; Prigge et al. 2016).  
123 The *tir1-1* allele, which causes an amino acid substitution within the leucine-rich repeat  
124 domain of the protein, has been reported to act as a dominant-negative allele (Dezfulian  
125 et al. 2016; Wright et al. 2017). However, we found that the root elongation phenotype  
126 of plants heterozygous for the *tir1-1*, *tir1-10*, and *tir1-9* alleles were not significantly  
127 different from each other and each displays a semi-dominant phenotype (Figure 1—  
128 figure supplement 2B). These results argue against a dominant negative effect for *tir1-1*  
129 since neither *tir1-9* or *tir1-10* produce detectable levels of transcript (Ruegger et al.  
130 1998; Parry et al. 2009). Nevertheless, because it is possible that a dominant-negative  
131 effect might be revealed in higher-order mutants and because the *afb2-3* allele may not  
132 be a complete null allele (Parry et al. 2009), we generated selected mutant  
133 combinations also using the *tir1-10* (Parry et al. 2009) and the *afb2-1* (Dharmasiri et al.  
134 2005) T-DNA insertion alleles. The *afb2-1* allele was introgressed from the *Ws-2*  
135 background into the *Col-0* background through at least eight crosses. For brevity,

136 mutant line names will be simplified such that “*tir1afb25*” corresponds to the *tir1-1 afb2-*  
137 *3 afb5-5* triple mutant line, for example, unless other allele numbers are specified.

138

139 The sixty-three mutant combinations displayed a wide range of phenotypes from  
140 indistinguishable from wild type to early-embryo lethality (Figure 1—figure supplement  
141 3). The non-lethal higher-order mutant combinations displayed a cohort of phenotypes  
142 associated with mutants defective in auxin signaling: smaller rosettes, reduced  
143 inflorescence height, reduced apical dominance, fewer lateral roots, and partially or  
144 wholly valveless gynoecea (Figure 1; Figure 1—figure supplements 3 and 4). The three  
145 viable quintuple mutants—*tir1afb1245*, *tir1afb1345*, and *afb12345*—had rosettes  
146 approximately half the diameter and inflorescences less than half the height of WT Col-  
147 0. Despite being smaller, these lines produced approximately twice as many branches  
148 as WT (Figure 1A; Figure 1—figure supplement 4). Remarkably, lines retaining only one  
149 copy of *TIR1* (*tir1/+ afb12345*) or one copy of *AFB2* (*afb2/+ tir1afb1345*) were viable.  
150 The rosettes of these two lines were much smaller than those of WT plants with the  
151 *tir1/+ afb12345*'s rosette phenotype being slightly more severe (Figure 1B). In contrast,  
152 *afb2/+ tir1afb1345* plants developed shorter primary inflorescences and appeared to  
153 completely lack apical dominance as all axillary meristems became active upon  
154 flowering. The *afb2/+ tir1afb1345* and *tir1/+ afb12345* plants rarely produced seeds.  
155 Lines containing the alternate alleles—*afb2-1/+ tir1-10 afb1345* and *tir1-10/+ afb2-1*  
156 *afb1345*—displayed phenotypes indistinguishable from the corresponding lines (Figure  
157 1B).

158



159 Auxin plays an important role in many aspects of root development. To begin to assess  
160 the role of the *TIR1/AFBs* during root growth, we measured the effect of exogenous IAA  
161 on primary root growth in the mutant lines. The responses ranged from indistinguishable  
162 from WT to nearly insensitive to 0.5  $\mu$ M IAA (Figure 1—figure supplement 4E), where  
163 the roots of lines containing the *tir1* and *afb2* mutations displayed strong IAA resistance  
164 (Dharmasiri et al. 2005; Parry et al. 2009). In addition, we found that the *afb3* and *afb5*  
165 mutations had substantial effects on auxin response, while the *afb4* mutation had a  
166 more modest effect. The mutant lines also responded similarly to exogenous auxin with  
167 respect to lateral root production. The lines more resistant to IAA in the root elongation  
168 assay tended to produce fewer lateral roots (Figure 1—figure supplement 4D, 4E).

169

### 170 **Combinatorial mutant analyses revealed roles for *TIR1/AFB* family members** 171 **except *AFB1***

172 Each of the *tir1/afb* mutations, except for *afb1*, affected the above-described  
173 phenotypes but to varying extents. To appraise the effects of each mutation on several  
174 plant phenotypes, we plotted the mean values for each phenotype minus that of the  
175 corresponding line without that mutation. Larger effects are indicated by greater  
176 deviations from zero. For both the root elongation assay and the induction of lateral root  
177 primordia, the *tir1* allele had the largest effect with the *afb2*, *afb5*, *afb3*, and *afb4*  
178 mutations having smaller median effects (Figures 2A and 2B). The *afb1* mutation had  
179 little or no effect on root elongation but, surprisingly, had an opposite effect on lateral  
180 root formation.

181

182 Only *tir1* and, to a lesser degree, *afb2* affect rosette diameter in most contexts with the  
183 median effects for *afb3*, *afb4*, and *afb5* being very close to zero (Figure 2C). However,  
184 they have huge collective effects, where the *afb2345* quadruple mutant is over 6 cm  
185 smaller than each of the four triple mutants (blue arrowheads; Figures 2C). Consistent  
186 with previous reports that *AFB5* plays a key role in regulating inflorescence branching  
187 and height (Prigge et al. 2016; Ligerot et al. 2017), the *afb5* mutation has the largest  
188 effect on these phenotypes, although each mutation, except for *afb1*, had some effect  
189 (Figures 2D and 2E).

190

191 While the *afb1* mutation had minimal effect on most aspects of plant growth, it  
192 suppressed the lateral root phenotype of some mutant lines both with and without auxin  
193 treatment (Figure 2B; below). We found that the *afb1* mutation suppressed the  
194 phenotype of both the *afb234* ( $2.15 \pm 0.13$  versus  $1.75 \pm 0.10$  lateral roots/cm) and *afb345*  
195 triple mutants ( $3.10 \pm 0.13$  versus  $1.96 \pm 0.14$  lateral roots/cm) measured after 12 days on  
196 media not supplemented with IAA. This behavior was not observed in an otherwise WT  
197 background ( $2.76 \pm 0.11$  for *afb1* versus  $3.23 \pm 0.15$  lateral roots/cm for Col-0) nor in a  
198 *tir1-1* background ( $1.75 \pm 0.08$  versus  $2.34 \pm 0.09$  lateral roots/cm for *tir1*). Each of the  
199 pairs were significantly different (two-tailed *t*-test,  $p < 0.03$ ).

200

### 201 **Penetrance of *tir1/afb* embryonic root formation defects are temperature sensitive**

202 The *tir1afb23* and *tir1afb123* lines were previously shown to display a variably penetrant  
203 phenotype in which seedlings lack roots, lack both roots and hypocotyls, or fail to  
204 germinate (Dharmasiri et al. 2005; Parry et al. 2009). All lines homozygous for both *tir1*

205 and *afb2* plus either *afb3*, *afb4*, or *afb5* display these defects to some degree ranging  
206 from 1% in *tir1afb24* to 99% in *tir1afb1234* (Figure 1—figure supplements 3 and 5).

207

208 We had noticed a sizeable difference in the proportion of seedlings lacking roots from  
209 different batches of seeds. To test whether the temperature at which the seeds mature  
210 affects the penetrance of the rootless seedling phenotype, we grew *tir1afb23*,  
211 *tir1afb123*, *tir1afb245* and WT in parallel at 17°C, 20°C, and 23°C and scored the  
212 progeny seedling phenotypes (Figure 1—figure supplement 5). The penetrance of the  
213 phenotype for all three lines was significantly lower at 20°C than at either 17°C or 23°C  
214 for all with the exception that the difference with *tir1afb245* at 17°C was not significant  
215 using the Fisher's exact test. This suggests that aspects of the auxin regulatory system  
216 are sensitive to temperature.

217

### 218 **The *tir1afb12345* mutant line exhibits defects early in embryogenesis**

219 Because *tir1afb235* seedlings were not identified among the progeny of *tir1/+ afb235* or  
220 *afb2/+ tir1afb35* plants, we examined developing embryos dissected from the siliques  
221 from these lines. Eleven of 41 (27%) and 52 of 213 (24%), respectively, of the embryos  
222 from each line lacked cotyledons and had over-proliferated suspensors while the rest  
223 had a WT phenotype (Figure 3A, 3A').

224

225 Because all mutant combinations expected to produce one-quarter *tir1afb2345* progeny  
226 were either seedling lethal or infertile, we created a transgene that hemizygotously  
227 complements these phenotype and segregates as a single locus. We assembled the

228 complementing genomic fragments encoding TIR1, AFB2, and AFB5, each carboxy-  
229 terminally fused with the coding sequences for different monomeric fluorescent proteins  
230 (mOrange2, mCitrine, and mCherry, respectively) concatenated into a single binary  
231 plasmid (Figure 3—figure supplement 1). This construct was transformed into progeny  
232 of *tir1/+ afb5/+ afb1234* plants, backcrossed and selfed to obtain a sextuple mutant  
233 background, and two *TIR1/AFB5/AFB2* lines were identified that complemented the  
234 sextuple mutant phenotype when hemizygous and segregated as a single locus. Using  
235 this approach, one-quarter of the progeny of plants hemizygous for these transgenes  
236 display embryo defects, while the complemented siblings are easily identified because  
237 they expressed fluorescent TIR1, AFB2, and AFB5 fusion proteins.

238  
239 The earliest potential difference between sextuple mutants and the complemented  
240 siblings is that the initial division of the embryo proper was occasionally displaced from  
241 vertical in sextuple 2-cell embryos (3 of 19 were  $>12^\circ$  from vertical) compared to  
242 complemented sibling embryos (0 of 64), however the average angles from vertical  
243 were not significantly different ( $p = 0.32$ ) (Figure 3B–C versus 3B'–C', 3N). The third  
244 round of divisions in the embryo proper separates the upper and lower tiers with the  
245 lower surface of the upper tier typically being slightly convex, and this curvature is  
246 significantly more prominent in the sextuple mutants ( $p = 1.4 \times 10^{-7}$ ; Figure 3D versus  
247 3D', 3O). Later, during the transition from the 8-cell to the 16-cell embryos, nearly all cell  
248 divisions in the complemented embryos are oriented periclinally, as in WT embryos. In  
249 contrast, 69% of these division are anticlinal in the mutant embryos (Figure 3E and 3E',  
250 3P). In WT 32-cell stage embryos, the hypophysis cell normally divides asymmetrically

251 to produce the lens-shaped cell which is required for the formation of the embryonic  
252 root. This division was delayed in the mutant, and when it occurred, was symmetrical  
253 (Figure 3G–H and 3G'–H'). Later, the cells of the embryo proper slow or cease dividing  
254 and the cells of the suspensor begin to proliferate and invariably produce a radially  
255 symmetric terminal phenotype (Figure 3I–M, 3I'–M'). Around the stage where  
256 complemented siblings are at the bent-cotyledon stage, the cells of the sextuple mutant  
257 senesce and seed development is aborted (Figure 3—figure supplement 2). Hence, the  
258 sextuple mutant reveals the importance of *TIR1/AFB* auxin response machinery from  
259 the earliest stages of embryogenesis.

260

261 **Expression of embryo-patterning reporters is disrupted in the *tir1afb235***  
262 **quadruple mutant**

263 To learn more about the early embryo defects, we introgressed marker genes into lines  
264 segregating the *tir1afb235* quadruple mutant. This quadruple mutant displays a  
265 phenotype indistinguishable from that of the sextuple mutant from at least the  
266 dermatogen stage, when quadruple mutants can first be reliably distinguished from non-  
267 quadruple mutants (Figure 4). Expression of the auxin-responsive marker  
268 *DR5<sub>rev</sub>:3×Venus-N7* was undetectable in embryos displaying the mutant phenotype  
269 (Figure 4E–G; compare to Figure 4A–C; 0/10 in quadruple mutants and 26/26 in non-  
270 mutant siblings) indicating that auxin-regulated transcription through the remaining  
271 receptors, AFB4 and AFB1, is minimal at most during embryogenesis. Similarly, the  
272 quiescent center marker *WOX5:GFP* marker was not detected in the mutant embryos  
273 (Figure 4H), whereas in wild type the reporter is first expressed in the hypophysis prior

274 to its asymmetric division then persists in the quiescent center cells (Figure 4D; 0/11 in  
275 quadruple mutants and 28/28 in non-mutant siblings).

276

277 Auxin efflux reporter *PIN7-Venus* is normally expressed in the suspensor, hypophysis,  
278 hypophysis-derived cells, and weakly in protodermal cells of the lower tier (Figure 4K–  
279 L). In mutant embryos, *PIN7-Venus* is faintly detectable in these cells in globular-stage  
280 embryos. Unexpectedly, the signal is much stronger in protodermal cells of the embryo  
281 proper, especially in the lower tier, by the 32-cell stage (Figure 4O–P; 7/8 quadruple  
282 mutants and 0/14 siblings). The same pattern was observed with the *PIN7-GFP* marker  
283 (Figure 4U; 8/8 quadruple mutants and 0/30 siblings). The auxin efflux reporter *PIN1-*  
284 *Venus* is initially expressed in a reciprocal pattern to *PIN7-Venus*, in all the cells above  
285 the hypophysis except the lower-tier protodermal cells and is later refined to strips from  
286 the provascular cells out to the cotyledon tips (Figure 4I–J; 12/12 of phenotypically  
287 normal embryos). In the mutants, *PIN1-Venus* signal is reduced and restricted primarily  
288 to apical protodermal cells (Figure 4M–N; 9/9 quadruple mutants). This is reminiscent  
289 but more severe than its pattern in *monopteros* mutants where provascular expression  
290 is merely reduced. The *NTT-YPet* marker gene is normally first strongly expressed in 8-  
291 to 16-cell embryos in the nuclei of suspensor cells and the hypophysis and persists in  
292 the suspensor and the hypophysis-derived cells in later embryo stages (Figure 4R–T;  
293 58/59 phenotypically normal embryos))(Crawford et al. 2015). In mutants, *NTT-YPet*  
294 appears normally in most suspensor cells, but not always including the hypophysis (2/6  
295 32-cell quadruple mutant embryos had signal above background in the hypophysis),  
296 and is progressively lost in the distal suspensor cells before the abnormal lateral cell

297 divisions occur (Figure 4V–X; 4/4 late-globular-stage mutants lacked signal in both the  
298 hypophysis and the adjacent suspensor cell). This is very similar to NTT-YPet  
299 expression in a *monopteros* mutant embryos (Crawford et al. 2015).

300

301 **Gametophytically expressed TIR1/AFBs do not contribute to gametophytic**  
302 **viability**

303 Because the maternal supply of auxin and the endosperm both play important roles in  
304 embryo development, it is possible that female gametophytes lacking auxin receptors  
305 would not be viable. Although the incidence of sextuple mutant embryos shows that  
306 gametophytically-expressed auxin receptors are not required for viability, it is possible  
307 that they contribute to robust transmission. To test the transmission through sextuple  
308 mutant megagametophytes and pollen, we carried out reciprocal crosses between wild  
309 type (Col-0) and the hemizygotously *TIR1/AFB5/AFB2*-complemented sextuple mutant. If  
310 the sextuple mutant gametophyte survives and is fertilized, the progeny's embryo  
311 lethality would be rescued by wild-type copies of each receptor provided by the Col-0  
312 parent. The F<sub>1</sub> progeny were scored for the presence of the transgene to infer the  
313 sextuple's transmission rates through both gametophytes (Figure 3—figure supplement  
314 3). The sextuple mutant was transmitted nearly as well as without the complementing  
315 transgene as with it through both the pollen (49.4%) and the female gametophyte  
316 (47.9%) ( $\chi^2$  test  $p = 0.81$  and  $0.43$ , respectively). This indicates that gametophytically  
317 expressed TIR1/AFBs do not contribute to gametophytic viability.

318

319 **Functional TIR1/AFB-mCitrine reporters reveal contrasting patterns of spatio-**  
320 **temporal expression and sub-cellular localizations**

321 To reveal whether differences in expression pattern can account for the relative  
322 importance of the TIR1/AFBs in different aspects of growth and development, C-  
323 terminal fusions with the bright, relatively fast-maturing, monomeric fluorescent protein  
324 mCitrine were produced for each TIR1/AFB protein in the corresponding single mutant  
325 background. Each transgene complemented the mutant phenotypes (Figure 5—  
326 supplement 1). The fluorescent signal in the *AFB5-mCitrine* lines was fairly uniformly  
327 distributed in shoot apices (Figure 5F), while in the *AFB3-mCitrine*, *AFB2-mCitrine*, and  
328 *TIR1-mCitrine* lines, fluorescence was more restricted to young primordia and meristem  
329 peripheral zones (Figure 5A, 5C–D). Within organ primordia, *TIR1-mCitrine* appears to  
330 be strongest in the adaxial domains of the youngest primordia. Signal for the *AFB4-*  
331 *mCitrine* line was barely detectable (Figure 5E), while that of *AFB1-mCitrine* was very  
332 strong and largely complementary to *TIR1-mCitrine* in that the strongest signal was in  
333 abaxial domains and in the stem (Figure 5B). The expression patterns in either primary  
334 or lateral roots for each *TIR1/AFB* gene except *AFB4* translationally fused to a YFP  
335 have been reported previously (Prigge et al. 2016; Wang et al. 2016; Rast-Somssich et  
336 al. 2017; Roychoudhry et al. 2017). TIR1-, AFB2-, AFB3-, and AFB5-mCitrine signal  
337 was uniformly detected throughout the root meristematic region and fainter signal  
338 detected in the root cap cells (Figure 5G, 5I–J, 5L; Figure 5—figure supplement 2) as  
339 shown previously. AFB1-mCitrine is very highly expressed throughout the root except  
340 for the columella, cortex, endodermis, and pericycle of the meristematic region (Figure  
341 5H). AFB4-mCitrine signal in lines that complemented the *afb4* phenotype was barely



342 detectable. However, an *AFB4-mCitrine* line that is hypersensitive to the synthetic auxin  
343 picloram line's expression pattern was comparable to that of *AFB5-mCitrine* (Figure 5K;  
344 Figure 5—figure supplement 2I–L). In embryos, TIR1-, AFB2-, AFB3-, and AFB5-  
345 mCitrine accumulate fairly uniformly throughout the embryos and suspensors while  
346 AFB4-mCitrine's signal was close to background levels and AFB1-mCitrine was  
347 undetectable (Figure 5T–Y).

348

349 The subcellular localization of different TIR1/AFB proteins varied substantially (Figure  
350 5M–S; Figure 5—figure supplement 3). We quantified this variation more precisely by  
351 measuring the relative level of each protein in the nucleus versus outside the nucleus in  
352 epidermal cells of the root elongation zone based on mCitrine fluorescence (Figure 5S).  
353 TIR1-mCitrine is primarily in nuclei while significant amounts of AFB2 through AFB5 are  
354 present in the cytoplasm. Strikingly, AFB1-mCitrine appears primarily outside the nuclei.  
355 The localizations are consistent across multiple lines and, when tested, different  
356 fluorescent protein tags (Figure 5—figure supplement 2). Hence, despite being from the  
357 same clade, TIR1 and AFB1 proteins exhibit contrasting patterns of primarily nuclear  
358 and cytoplasmic subcellular localizations, respectively.

359

### 360 **AFB1 plays a key role in the rapid auxin inhibition of root growth**

361 Gravitropic curvature of the root is a rapid auxin-regulated growth response that  
362 requires asymmetric distribution of auxin between the upper and lower side of the root  
363 (Sato et al. 2015). According to the current model, auxin has two modes of action during  
364 gravitropism: a rapid nongenomic phase, followed by a transcriptional phase that is

365 dependent on the TIR1/AFB proteins (Shih et al. 2015). Surprisingly, recent studies  
366 demonstrate that rapid, nongenomic auxin inhibition of root growth is dependent on the  
367 TIR1/AFBs (Fendrych et al. 2018). To determine the relative contribution of the  
368 TIR1/AFB family members to the rapid response, we measured the effect of 10 nM IAA  
369 on root growth in various *tir1/afb* lines over a 20-minute time period (Figure 6; Figure  
370 6—figure supplements 1–3). The results in Figure 6 show that each of the TIR1/AFBs  
371 contributes to rapid root growth inhibition but that, surprisingly, the *afb1-3* mutant is  
372 almost completely resistant to auxin indicating that AFB1 is the dominant auxin receptor  
373 for this response. Expression of *AFB1-mCit* under control of the *AFB1* promoter  
374 restored the wild-level of auxin response. The behavior of the *afb1* mutant is particularly  
375 remarkable since the mutant is not affected in any of the other auxin-regulated growth  
376 processes that we characterized, with the possible exception of lateral root formation.  
377 This includes long-term inhibition of root growth. Thus, the *afb1* mutant is a useful tool  
378 to discriminate between nongenomic and transcriptional auxin responses.

379

380 As a contrast we also examined the effect of auxin on etiolated hypocotyl growth in the  
381 mutant lines. This response is slower than the root response and depends on the  
382 canonical nuclear TIR1/AFB pathway (Fendrych et al. 2016). Dissected hypocotyl  
383 segments from etiolated seedlings were treated with 5  $\mu$ M NAA and imaged every 10  
384 minutes for 180 minutes. The response of the mutant lines was complex (Figure 6—  
385 figure supplement 4). Several lines were clearly resistant to auxin, particularly  
386 *tir1afb1245* and *tir1afb245*. Notably, comparison of these lines suggests that the *afb1*  
387 mutation did not contribute to resistance. Other lines also lacking both *AFB4* and

388 *AFB5*—*afb1345*, *tir1345*, *afb1245*, and *afb12345*—display a moderate level of  
389 resistance. Finally, three lines, *tir1afb134*, *tir1afb23*, and *tir1afb124* are hypersensitive  
390 to auxin in this assay (Figure 6—figure supplement 4).

391

### 392 **AFB1 regulates the initial phase of root gravitropic response**

393 Gravitropic root curvature is first apparent less than 10 minutes after a gravity stimulus  
394 (Shih et al. 2015). It has been proposed that the early stage of gravitropism is mediated  
395 by a non-genomic auxin response while prolonged root curvature requires auxin  
396 regulated transcription (Sato et al. 2015). Since AFB1, and to a lesser extent, the other  
397 TIR1/AFBs, contribute to nongenomic inhibition of root elongation, we wondered if they  
398 are required for the early gravitropic response. To test this possibility, we performed  
399 gravitropism assays on a number of *tir1/afb* lines (Figure 7; Figure 7—figure supplement  
400 1). The gravitropic response can be divided into three phases. A slow or lag phase  
401 which occurs over the first 90 minutes in Col-0, followed by a 3-hour linear phase and  
402 finishing with a plateau phase. The *tir1afb345* line exhibits a slower gravitropic response  
403 during the linear phase and a reduced angle at plateau compared to WT (Figure 7A) as  
404 expected based on results with other *tir1/afb* mutant combinations (Dharmasiri et al.  
405 2005). Strikingly, the *tir1afb1345* mutant exhibited an additional decrease in the  
406 gravitropic response during the initial lag phase demonstrating that AFB1 is required for  
407 this phase (Figure 7A Figure 7-figure supplement 1A). The *tir1afb1* line  
408 showed a similar decrease in the lag phase compared to *tir1* (Figure 7B Figure 7-figure  
409 supplement 1B). It seems likely that TIR1 also contributes to the early response since  
410 the *tir1afb1* double mutant showed a stronger delay compared to either single mutant.

411 In addition, both *tir1* and *afb1* displayed a reduced early response in one of the two  
412 experiments (Figure 7—figure supplement 1B). Since other members of the family also  
413 confer low levels of auxin resistance in the rapid root growth response, these proteins  
414 may also make a small contribution to the early phase of gravitropism (Figure 6A).  
415 Further, both *afb1 AFB1-mCitrine* lines responded appreciably faster than the *afb1*  
416 mutant during the first 2 hours with the brighter of the two mCitrine lines, line #7,  
417 exhibiting a difference by 30 minutes (Figure 7C; Figure 7—figure supplement 1C).  
418 Interestingly, both mCitrine lines started to plateau earlier and at a reduced angle  
419 compared to wild type while *afb1* plateaued later and at an increased angle, suggesting  
420 that AFB1 and the rapid response also play a role at later stages of the gravitropic  
421 bending response.

422

## 423 **DISCUSSION**

424 The TIR1/AFB protein family has expanded through a series of gene duplication events  
425 that began before fern–seed-plant divergence. Despite the fact that three major  
426 subclades were established approximately 400 MYA (Morris et al. 2018), our genetic  
427 studies reveal that for most auxin-regulated growth processes, the TIR/AFB proteins  
428 retain largely overlapping functions. The striking exception to this general statement is  
429 the dominant role for AFB1 in rapid auxin inhibition of root growth. In general, *TIR1* is  
430 most important for normal growth and development, but *AFB5* and *AFB2*, and to a  
431 lesser extent *AFB3* and *AFB4*, also play significant roles. Spatial differences are also  
432 apparent; *TIR1* has a major role in the root while *AFB5* is relatively more important in  
433 hypocotyl and inflorescence development.

434

435 Although all six genes are broadly expressed, it appears that the relative importance of  
436 individual TIR1/AFB proteins in various organs are at least partly related to differences  
437 in expression. For example, *AFB5* is more broadly expressed than the other genes in  
438 the inflorescence while in the root, *TIR1* and *AFB2* are most highly expressed. The  
439 *AFB4* gene is expressed at a lower level in all tissues consistent with its relatively minor  
440 role. Additional differences in patterns of expression are also apparent, particularly in  
441 the inflorescence. Further studies will be required to determine if these differences are  
442 important.

443

444 Our studies demonstrate that the levels of the TIR1/AFB proteins are not uniform  
445 throughout the plant. This is true for individual members of the family and for total  
446 TIR1/AFB levels across different tissues and cell types. Earlier experiments also  
447 showed that TIR1/AFB levels can be dynamic in a changing environment (Vidal et al.  
448 2010; Wang et al. 2016). These observations may have important implications for use of  
449 DII-Venus-based auxin sensors to estimate relative auxin levels, since levels of the  
450 sensor protein are dependent on both auxin and the TIR1/AFBs (Brunoud et al. 2012;  
451 Liao et al. 2015). Given the debate over an auxin-response asymmetry across shoot  
452 organ primordia (Bhatia et al. 2019; Guan et al. 2019), it is particularly interesting that  
453 we see an asymmetric distribution of TIR1-mCitrine across flower primordia.

454

455 It is important to emphasize that individual members of the family may have functions in  
456 particular environmental conditions. For example, the microRNA miR393 is known to

457 target *TIR1*, *AFB2*, and *AFB3* but not other members of the family (Jones-Rhoades and  
458 Bartel 2004; Navarro et al. 2006). Regulation of miR393 abundance modulates the  
459 levels of these three TIR1/AFBs to facilitate various growth processes, such as lateral  
460 root formation and hypocotyl elongation in response to environmental signals (Vidal et  
461 al. 2010; Pucciariello et al. 2018).

462

463 Previous *in vitro* studies have documented some differences in the biochemical activity  
464 of members of the TIR1/AFB family (Calderón Villalobos et al. 2012; Lee et al. 2014).  
465 Similarly, an auxin-induced degradation assay in yeast reveals differences in the  
466 behavior of TIR1 and AFB2 (Wright et al. 2017). In contrast, our results do not reveal  
467 any biochemical specificity, except for *AFB1* (see below). Thus, a single *TIR1* or *AFB2*  
468 allele is sufficient to support viability throughout the plant life cycle albeit with  
469 dramatically reduced fertility. This contrasts to functional diversification seen in other  
470 well-studied gene families that diverged in a similar time frame such as the  
471 phytochrome photoreceptors and Class III HD-Zip transcriptional regulators (Prigge et  
472 al. 2005; Franklin and Quail 2010; Strasser et al. 2010). It is possible that the retention  
473 of overlapping functions reflects stricter constraints on TIR1/AFB protein function. One  
474 possibility is that the different *TIR1/AFB* paralogs have been maintained because they  
475 contribute to the robustness of the auxin signaling system. Of course, specific functions  
476 may be revealed in future studies.

477

478 The importance of auxin in patterning of the developing embryo is well established  
479 (Palovaara et al. 2016). Auxin signaling, as evidenced by activity of the *DR5* reporter, is

480 first apparent in the apical cell of the embryo (Friml et al. 2003). The essential role of  
481 auxin in the apical cell and later in the hypophysis is clearly demonstrated by the  
482 defects in the division of these cells in the *tir1afb235* quadruple and *tir1afb12345*  
483 sextuple mutant (Figure 3). Similar defects are observed in a number of other auxin  
484 mutants including those affecting response (*monopteros* and *bodenlos*), auxin synthesis  
485 (*yuc1 yuc4 yuc10 yuc11* and *taa1 tar1 tar2*) and transport (*pin1 pin3 pin4 pin7* and *aux1*  
486 *lax1 lax2*) (Berleth and Jürgens 1993; Hardtke and Berleth 1998; Hamann et al. 1999;  
487 Hamann et al. 2002; Friml et al. 2003; Cheng et al. 2007; Stepanova et al. 2008; Robert  
488 et al. 2015). However, none of these lines exhibit the fully penetrant embryo-lethal  
489 phenotype observed for the *tir1afb235* quadruple and *tir1afb12345* sextuple mutants. In  
490 the other mutants, significant fractions of embryos escape embryo lethality and  
491 germinate, albeit often as rootless seedlings.

492

493 The expression of key embryonic markers in the mutants also reveals profound defects  
494 in embryonic patterning by the dermatogen stage. Although *tir1afb235* embryos form a  
495 morphologically normal hypophysis cell, this cell never expresses *NTT-YPet* or  
496 *WOX5:GFP*. The proliferation of suspensor cells in the mutant is associated with  
497 reduced expression of the suspensor marker *PIN7-Venus* and to a lesser extent *NTT-*  
498 *YPet* suggesting that the TIR1/AFB pathway is required to maintain the suspensor cell  
499 fate, consistent with an earlier study (Rademacher et al. 2012). *PIN1-Venus* is normally  
500 expressed in most cells distal from the hypophysis in globular embryos and in  
501 provascular tissue in later embryos, but it was expressed primarily in apical protodermal  
502 cells in *tir1afb235* mutants (Figure 4M–N). This is reminiscent of its pattern in the

503 *monopteros* mutant, where some protodermal expression appears although the  
504 provascular expression is retained (Breuninger et al. 2008). Because both cotyledon  
505 specification and *PIN1* expression are influenced by auxin perception, it is unclear  
506 whether the mutant embryos lack the radial asymmetry that predicts cotyledon  
507 positioning or fail to elaborate on this asymmetry. It was surprising to observe that *PIN7*-  
508 *Venus* exhibits ectopic expression in the embryo proper. The reason for this is unclear  
509 but *PIN7* expression may normally be repressed in the embryo by a TIR1/AFB-  
510 dependent pathway. Given that *PIN1* and *PIN7* are normally expressed in non-  
511 overlapping domains in the embryo (Friml et al. 2003), one possibility is that the  
512 reduction in *PIN1* expression in the mutants allows *PIN7* to be expressed beyond its  
513 normal boundaries.

514

515 In contrast to the embryo, the role of auxin in gametophyte development is uncertain.  
516 Several reports suggest that auxin has an important role in patterning of the female  
517 gametophyte (Pagnussat et al. 2009; Panoli et al. 2015; Liu et al. 2018). Others have  
518 argued against a role for auxin based on theoretical considerations as well as lack of  
519 evidence for an auxin response using several auxin reporters (Lituiev et al. 2013). Our  
520 studies suggest that the TIR1/AFB auxin receptors are not required for gametophyte  
521 development although we cannot rule out a minor role. It is important to note that we  
522 have not directly examined developing sextuple gametophytes and it is possible that  
523 there are minor defects that do not affect viability. We also can't eliminate the possibility  
524 of perdurance of TIR1/AFB proteins from the maternal tissue. Finally, it is possible that



525 auxin is required, but acts through a non-canonical pathway such as that involving auxin  
526 binding to the ETTIN protein (Simonini et al. 2016).

527

528 *AFB1* is unique among the auxin co-receptors and appears to have undergone  
529 pronounced functional changes during the diversification of the Brassicales order since  
530 the *TIR1–AFB1* duplication in the At- $\beta$  WGD around 80 to 90 million years ago (Figure  
531 1—supplement 1C) (Edger et al. 2018). Although *AFB1* can interact with Aux/IAA  
532 proteins in an auxin-dependent manner, it does not appear to assemble into a Skp,  
533 Cullin, F-box containing (SCF) complex as efficiently as the other *TIR1/AFBs* and is not  
534 primarily localized to the nucleus where it could directly influence transcriptional  
535 responses (Dharmasiri et al. 2005; Yu et al. 2015)(Figure 5N and 5S; Figure 5—figure  
536 supplement 2C–D). The F-Box substitutions in *AFB1* affecting SCF assembly appeared  
537 between approximately 45 and 65 million years ago (Figure 1—supplement 1C)(Edger  
538 et al. 2018). It is noteworthy that unlike the other *TIR1/AFB* genes that are broadly  
539 expressed in most cells, *AFB1* is expressed very highly in some tissues (root epidermis  
540 and vascular tissue) and not at all in others (meristematic pericycle and early embryos).  
541 Based on our genetic studies, *AFB1* appears to have a negative effect on lateral root  
542 initiation in the *afb234* and *afb345* lines despite the fact that *AFB1* is not expressed in  
543 the pericycle, the site of lateral root initiation, suggesting that this may be a non-cell-  
544 autonomous effect.

545

546 We find that *AFB2* through *AFB5* are distributed between the nucleus and the  
547 cytoplasm, at least in epidermal cells of the root (Figure 5S). In contrast, the paralogs

548 TIR1 and AFB1 differ dramatically in being highly enriched in the nucleus and in the  
549 cytoplasm, respectively. In Arabidopsis roots, auxin treatment results in very rapid  
550 responses including increased cytosolic Ca<sup>++</sup> levels, alkalization of the apoplast and  
551 inhibition of root growth (Shih et al. 2015; Dindas et al. 2018; Fendrych et al. 2018).  
552 Because these events occurred too rapidly to involve transcription, it was assumed that  
553 they did not require the TIR1/AFB proteins. However, recent studies have demonstrated  
554 that two rapid responses, inhibition of root growth and membrane depolymerization in  
555 root hairs, do require the TIR1/AFBs (Dindas et al. 2018; Fendrych et al. 2018).  
556 Surprisingly we find that the growth inhibition response is mediated primarily by AFB1.  
557 This may reflect the high level of AFB1 in the cytoplasm. It is not currently clear how  
558 deeply conserved the cytoplasmic localization of AFB1 is. It is possible that AFB1's  
559 specialization is a relatively recent event and that the responsibility of mediating the  
560 rapid response is shared by multiple TIR1/AFB proteins in other plant lineages. An  
561 answer to this question will require further information on the molecular basis for AFB1  
562 localization.

563

564 It has been proposed that the rapid nongenomic auxin response in the Arabidopsis root  
565 has a role in early stages of root gravitropism (Sato et al. 2015), and our results support  
566 this idea. Although the *afb1* mutant has only a modest effect on gravitropism by itself, in  
567 combination with *tir1* or *tir1afb345*, it confers a clear decrease in early gravity response.  
568 It is surprising that the *afb1* mutation has only a modest effect on root gravitropism  
569 given the nearly complete absence of the rapid nongenomic auxin response. This may  
570 be a reflection of the gravitropic assay we have employed. Further detailed studies of

571 the gravitropic response may reveal a more substantial role for the rapid response. The  
572 fact that two *AFB1-mCitrine* lines both appear to affect the early response as well as the  
573 angle at the plateau phase, hint at additional complexity. Although the rapid auxin  
574 response has only been described thus far in Arabidopsis, it is probably not unique to  
575 the Brassicales given that a relatively fast gravitropic response is common in diverse  
576 seed plants (Zhang et al. 2019). If the rapid auxin response evolved prior to the TIR1–  
577 AFB1 duplication event and the ancestral TIR1/AFBs contributed to both the nuclear  
578 genomic and cytoplasmic nongenomic auxin responses, the differences between TIR1  
579 and AFB1 represent an elegant example of subfunctionalization of AFB1 to a role in the  
580 non-genomic response and, possibly, of TIR1 to specialize in the nuclear auxin  
581 response. Furthermore, as AFB1 has a major role in the rapid response but little or no  
582 function in the transcriptional response, the *afb1* mutant provides a useful tool to  
583 separate the two responses.

584

585

## 586 **METHODS**

### 587 **Phylogeny**

588 The sources for the amino-acid sequences (Figure 1—figure supplement 1A) and  
589 CDS (Figure 1—figure supplement 1C) are listed in Supplementary File 1 (Jiao et al.  
590 2011; Goodstein et al. 2012; Johnson et al. 2012; Matasci et al. 2014; Wickett et al.  
591 2014; Xie et al. 2014; One Thousand Plant Transcriptomes 2019). Taxa were selected  
592 based on availability, quality, and diverse sampling at key nodes. A reduced set was  
593 included for COI1 homologs. The *AFB1* genes from *Camelina hispida*, *C. laxa*, and *C.*

594 *rumelica* were amplified from genomic DNA using Phusion Polymerase (New England  
595 Biolabs or ThermoFisher) and primers to regions of the 5' and 3' UTRs conserved in all  
596 three *C. sativa AFB1* genes in the *C. sativa* genome (Kagale et al. 2014). The PCR  
597 products were subcloned, and three *C. hispida* and *C. laxa* clones and a single *C.*  
598 *rumelica* clone were sequenced. The *CamhiAFB1* and *CamlaAFB1* sequences included  
599 in analysis appeared in two of the three clones (GenBank accession numbers  
600 MK423960–MK423962).

601 To build the alignment of F-Box-LRR protein sequences, sequences from distinct  
602 subclades were aligned using T-COFFEE v11.00 (Notredame et al. 2000) to identify  
603 and trim unique unalignable regions from individual sequences before aligning the  
604 whole set. Ambiguous regions of the full alignments were removed in Mesquite v3.5  
605 (Maddison and Maddison 2018). The raw alignment of nucleotide CDS sequences of  
606 Brassicales *TIR1/AFB1* genes was adjusted so that gaps fell between adjacent codons.  
607 Phylogenetic trees were inferred using MrBayes v3.2.6 (Ronquist et al. 2012). For the  
608 *TIR1/AFB/XFB/COI1* phylogeny, a total of six runs of four chains were split between two  
609 Apple iMac computers using the parameters `aamodelpr=mixed, nst=6, and`  
610 `rates=invgamma`. Only four of the six runs had converged after 16 million generations,  
611 so the analysis was restarted with three runs each starting with the best tree from one of  
612 the initial runs and with more heating (`temp=0.5`) for 10 million generations. The  
613 *TIR1/AFB1* nucleotide alignments were partitioned by codon position with  
614 `ratepr=variable, nst=6, rates=invgamma` with three runs of 4 chains run for five million  
615 generations. The consensus trees were viewed using FigTree v1.4.4 (Rambaut 2018).

## 616 **Mutants**

617           The alleles used—*tir1-1*, *tir1-9*, *tir1-10*, *afb1-3*, *afb2-1*, *afb2-3*, *afb3-1*, *afb3-4*,  
618 *afb4-8*, and *afb5-5*—have been described previously (Ruegger et al. 1998; Dharmasiri  
619 et al. 2005; Parry et al. 2009; Prigge et al. 2016). Seeds from *Camelina* species were  
620 provided by the United States National Plant Germplasm System (USDA-ARS, USA): *C.*  
621 *hispida* (PI 650133), *C. laxa* (PI 633185), and *C. rumelica* (PI 650138). Unless noted,  
622 plants were grown at 22°C long-day (16:8) conditions on ½× Murashige and Skoog  
623 media with 0.8% agar, 1% sucrose, and 2.5 mM MES, pH 5.7, or in a 2:1 mixture of soil  
624 mix (Sunshine LC1 or ProMix BX) and vermiculite. Leaf DNA was isolated with a  
625 protocol adapted from (Edwards et al. 1991) to use steel BBs (Daisy Outdoor Products),  
626 2 ml microcentrifuge tubes, and 20-tube holders (H37080-0020, Bel-Art). See  
627 Supplementary File 2 for primers used for genotyping.

628           Fluorescent marker lines were described previously: *NTT-2×YPet* (Crawford et  
629 al. 2015), *PIN7-GFP* (Blilou et al. 2005), *DR5<sub>rev</sub>:3×Venus-N7* (Heisler et al. 2005),  
630 *WOX5:GFP<sub>ER</sub>* (Blilou et al. 2005). The recombineered *PIN1-Venus* and *PIN7-Venus*  
631 markers (Zhou et al. 2011) were obtained from the Arabidopsis Biological Resource  
632 Center (CS67184 and CS67186). Previously characterized *PIN1-GFP* lines could not be  
633 used because of tight linkage to *AFB2* (CS9362) and co-segregation with *Ler*-derived  
634 enhancers of the *afb2/+ tir1afb35* phenotype (CS23889). Each marker was introgressed  
635 into lines segregating the *tir1afb235* quadruple mutant by two sequential crosses, PCR  
636 genotyping, and selfing. Marker line homozygosity was confirmed in F<sub>1</sub> seedlings from  
637 test crosses to WT. The *UBQ10:H2B-mTurquoise2* marker was assembled by  
638 combining the pK7m34GW destination vector (Karimi et al. 2007), *UBQ10prom\_P4P1R*

639 (Jaillais et al. 2011)(provided by Nottingham Arabidopsis Stock Centre, N2106315),  
640 H2B\_noStop/pDONR207 (provided by Frederic Berger), and 2×mTurquoise2/pDONR-  
641 P2RP3 using the LR Recombinase System (Life Technologies). For  
642 2×mTurquoise2/pDONR-P2RP3, the mTurquoise2 coding sequence (Goedhart et al.  
643 2012); provided by Joachim Goedhart) was amplified using primers mTU2\_P2RP3\_F  
644 and mTU2\_P2RP3\_wSTOP\_R primers and recombined into pDONR-P2RP3 vector in a  
645 BP reaction to give mTURQUOISE2/pDONR-P2RP3. This plasmid was amplified using  
646 the INS\_mTU2\_P2RP3\_F and INS\_mTU2\_P2RP3\_wSTOP\_R primers and the  
647 BB\_mTU2\_P2RP3\_F and BB\_mTU2\_P2RP3\_R primers. The PCR products were  
648 assembled by Gibson cloning (New England Biolabs) to give 2×mTurquoise2/pDONR-  
649 P2RP3. The *UBQ10:H2B-mTurquoise2* transgene was introduced to Col-0 plants as  
650 described (Simon et al. 2014).

#### 651 **Fluorescently tagged TIR1/AFB lines**

652 Genomic regions containing each of the *TIR1/AFB* genes were amplified using  
653 Phusion polymerase (New England Biolabs or ThermoFisher) from corresponding  
654 genomic clones (JAtY51F08, JAtY62P14, JAtY53F15, JAtY61O12, and JAtY52F19)  
655 except for *AFB3* which was amplified from Col-0 genomic DNA. See Supplementary File  
656 2 for primers used. The PCR products were cloned into pMiniT (New England Biolabs),  
657 and the stop codon was altered to create a *NheI* site using site-directed mutagenesis.  
658 An *XbaI* fragment containing either mCitrine (Griesbeck et al. 2001), mOrange2 (Shaner  
659 et al. 2008), or mCherry (Shaner et al. 2004) preceded by a short linker (either Arg-Gly<sub>5</sub>-  
660 Ala or Arg-Gly<sub>4</sub>-Ala) was ligated into the *NheI* sites. The genomic regions including the  
661 fluorescent protein genes were inserted in the *MluI* site of pMP535 (Prigge et al. 2005)

662 as *Ascl* fragments (*AFB5*) or as *MluI*-*Ascl* fragments (others). To produce the sextuple-  
663 complementation construct, the *TIR1-mOrange2* fragment was cloned into pMP535 as  
664 above, then *AFB2-mCitrine* was inserted into the re-created *MluI* site followed by *AFB5-*  
665 *mCherry* into its re-created *MluI* site. The constructs were introduced into the following  
666 strains by floral dip (Clough and Bent 1998): *tir1/+ afb5/+ afb1234* progeny (sextuple-  
667 complementation construct), *tir1afb23* (*TIR1-mCitrine*, *AFB3-mCitrine*, and *AFB3-*  
668 *mEGFP*), *tir1afb1245* (*AFB2-mCitrine*), *afb45* (*AFB4-mCitrine* and *AFB4-tdTomato*),  
669 *afb5-5* (*AFB5-mCitrine*, and *afb1-3* (*AFB1-mCitrine*). Basta-resistant candidate lines  
670 were selected based on complementation of visible phenotypes (except for *AFB1-*  
671 *mCitrine*) then crossed to get them into the appropriate mutant backgrounds. Once in  
672 the sextuple-mutant background, the complementation transgene was maintained as a  
673 hemizygote by checking siliques for aberrant embryos or aborted seeds. The *afb5-5*  
674 *AFB5-mCitrine* #9 and #19 lines were described previously (Prigge et al. 2016).

## 675 **Microscopy**

676 For confocal microscopy of the root meristem, five- to seven-day-old seedlings  
677 were stained in a 10 µg/ml aqueous solution of propidium iodide for one minute, rinsed  
678 in water, mounted with water, and viewed with either a Zeiss LSM 880 inverted  
679 microscope or a Zeiss LSM 710 inverted microscope. Embryos were fixed and stained  
680 with SCRI Renaissance 2200 (SR2200; Renaissance Chemicals, UK; (Crawford et al.  
681 2015). Briefly, using fine forceps and a 27-gauge needle as a scalpel, developing seeds  
682 were dissected from siliques and immediately immersed in fix solution (1×PBS, 4%  
683 formaldehyde (Electron Microscopy Sciences, 15713), and 0.4% dimethyl sulfoxide) in a  
684 six-well plate with 100µ-mesh strainers. A vacuum was pulled and held three times for

685 12 minutes each time, before rinsing twice with 1×PBS for 5 minutes. The embryos  
686 were transferred to SR2200 stain [3% sucrose, 4% diethylene glycol, 4% dimethyl  
687 sulfoxide and 1% SR2200 and stained overnight with vacuum pulled and released 3-4  
688 times. Seeds were mounted (20% glycerol, 0.1×PBS, 0.1% dimethyl sulfoxide, 0.1%  
689 SR2200, and 0.01% Triton X100) and the embryos were liberated by pressing on the  
690 coverslip. To detect mCitrine in the shoot apices, we removed stage 5 and older floral  
691 buds using fine forceps, fixed and rinsed (as with the embryos), soaked in ClearSee  
692 (Kurihara et al. 2015) for seven to ten days changing the solution every two to three  
693 days, and then stained with basic fuchsin (not shown) and Fluorescent Brightener 28  
694 (Calcofluor White M2R) as described (Ursache et al. 2018). Confocal image channels  
695 were merged using ImageJ or FIJI (Schindelin et al. 2012; Schneider et al. 2012).  
696 Cleared embryos were viewed by mounting dissected ovules in a solution containing 2.5  
697 g chloral hydrate dissolved in 1 ml 30% glycerol and viewed with a Nikon E600  
698 microscope.

### 699 **Fluorescence quantification**

700 In order to infer the amounts of TIR1/AFB protein inside and outside the nucleus,  
701 40× magnification images of epidermal cells in the elongation zone of each TIR1/AFB-  
702 mCitrine lines were captured. Because the nuclei of AFB1-mCitrine-expressing cells are  
703 not apparent, the F<sub>1</sub> of a cross with a plant with a *UBQ10:H2B-mTurquoise2* transgene  
704 was used to delineate the nucleus. Using FIJI (Schindelin et al. 2012), regions of  
705 interests including the entire cell (cell, based on propidium iodide staining), the nucleus  
706 (nuc, based on mCitrine or mTurquoise2 signal), and a cell-sized region outside the root  
707 (bg, background) were drawn using the freehand selections tool, and the area and



708 mean gray values were measured for the mCitrine channel for each. The percent  
709 nuclear was calculated using the equation  $\%_{\text{nuc}} = [\text{Area}_{\text{nuc}} \times (\text{Mean}_{\text{nuc}} - \text{Mean}_{\text{bg}})] \div$   
710  $[\text{Area}_{\text{cell}} \times (\text{Mean}_{\text{cell}} - \text{Mean}_{\text{bg}})]$ .

## 711 **Phenotype comparisons**

712 The viable *tir1afb* lines were divided based on whether they contained the *tir1*  
713 mutation, and the two batches were grown sequentially. The *afb123* line included in the  
714 initial batch displayed a long-hypocotyl phenotype that may have been picked up after  
715 an earlier cross to the *afb4-2* mutant, so a third batch was made up of alternative  
716 isolates for five lines whose pedigrees included a cross to *afb4-2*. Each batch included  
717 Col-0 and *tir1-1*. Seeds were surfaced sterilized, stratified in water for five days, spotted  
718 onto ½ MS medium containing 1% sucrose, and incubated in a light chamber (22°C).  
719 Twelve five-day-old seedlings for each genotype were transferred to 120 mm square  
720 plates containing the same medium containing either 0, 20, or 100 nM IAA (batch a), 0,  
721 100, or 500 nM IAA (batch b), or 0, 20, 100, or 500 nM IAA (batch c). Each plate  
722 received six seedlings from six genotypes spread out over two rows. Seedlings for each  
723 genotype were present on the top row of one plate and the lower row on a second plate  
724 placed in a different part of the growth chamber after marking the position of the root  
725 tips with a marker and scanning with Epson V600 flatbed scanners. The plates were  
726 scanned again after 72 hours (96 hours for batch c), and the growth was measured  
727 using imageJ. The plates containing 100 nM IAA were grown for a fourth day before the  
728 numbers of lateral roots protruding through the epidermis were counted using a  
729 dissecting microscope. Five seedlings from the no-IAA control plates were transferred to  
730 soil in 6cm pots and grown an additional 34 days. The genotypes for two plants per line

731 were confirmed by PCR. For each 42-day-old plant, the height from the rosette to the tip  
732 of the longest inflorescence and the maximum rosette diameter were measured, and the  
733 numbers of branches of at least 1 cm were counted. The IAA effects on root elongation  
734 data is presented as the percent relative to the growth without IAA  $\pm$  the relative  
735 standard error of the ratio. For the gene effect analyses, the averages from each batch  
736 were normalized using measurements for Col-0 and *tir1-1* plants that were included with  
737 each batch.

738

### 739 **Time lapse imaging of root growth**

740 Seeds were sown on  $\frac{1}{2}$  Murashige and Skoog medium containing 1% sucrose  
741 and 0.8% agar and stratified for 2-3 days at 4°C. Approximately fifteen 5-day-old  
742 seedlings were transferred to culture chambers (Lab-Tek, Chambers #1.0 Borosilicate  
743 Coverglass System, catalog number: 155361) containing the same agar medium  
744 supplemented with DMSO or IAA 10 nM (stock solution at 10  $\mu$ M in DMSO). The  
745 transfer of seedlings was completed within 45-60 seconds. Images were acquired every  
746 25 seconds for 20 minutes representing 50 images per root using Keyence microscope  
747 model BZ-X810 with 4 $\times$  lens.

748 Images obtained for one field were stacked and cropped to the region of interest  
749 (ROI). An auto threshold using the method “Default” was applied. In addition, the  
750 “erode”, “despeckle” and “Remove outliers” (radius 10, threshold 50) functions were  
751 used to smooth the image and remove the remaining background. Each root tip was  
752 selected and the “Ferret Distance” within the ROI (which corresponds to the longest  
753 distance in an object) was determined for each root. Image processing was automated

754 with an ImageJ macro, Supplementary File 6. For each time point the “Ferret Distance”  
755 root growth was calculated by subtracting the initial “Ferret Distance”. The values  
756 obtained were used to generate graphs. For each genotype, the experiment was  
757 repeated three independent times.

758 To determine the effect of auxin on root growth throughout the experiment, the  
759 area under each curve of auxin-treated roots was determined and divided by the  
760 corresponding value for roots grown on DMSO condition to calculate the root growth  
761 response to IAA. A response value of 1 indicates that IAA had no effect on root growth.  
762 The effect of IAA on root growth was determined this way to account for differences in  
763 root growth between genotypes on DMSO.

764 Each sample was subjected to four different normality tests (Jarque-Bera,  
765 Lilliefors, Anderson-Darling and Shapiro-Wilk). Samples were considered as a Gaussian  
766 distribution when at least one test was significant ( $p = 0.05$ ). As a normal distribution  
767 was observed a one-way ANOVA coupled with a post hoc Tukey Honestly Significant  
768 Difference test was performed ( $p = 0.05$ ).

769

## 770 **Hypocotyl segment elongation assay**

771 Measurements of etiolated hypocotyl elongation were carried out essentially as  
772 described previously (Fendrych et al. 2016; Li et al. 2018). Seeds were sterilized and  
773 stratified for four (set 1) or five (set 2) days before plating. After 6 hours of light  
774 treatment, the plates were wrapped in aluminum foil and sealed in a cardboard box for  
775 66 hours. The plates were opened in a room lit only with an LED desk lamp with six  
776 layers of green cello film (Hygloss Products) filtering the light. Using a dissecting

777 microscope with its light source filtered with six sheets of green cello film, the roots and  
778 cotyledons were excised using razor blades and the hypocotyls transferred to plates  
779 containing depletion medium (DM: 10 mM KCl, 1 mM MES pH 6, 1.5% phytigel)  
780 overlain with a piece of cellophane (PaperMart.com). After 30 to 80 minutes on DM, the  
781 hypocotyl segments were transferred to treatment plates (DM plus either 5  $\mu$ M NAA or  
782 the equivalent amount of solvent (0.025% ethanol). Eight to sixteen hypocotyls were  
783 transferred for each genotype and treatment except for there being only five control-  
784 treated *tir1afb23*. Using Epson V600 flat-bed scanners, the plates were scanned at  
785 1200 dpi 30-60 seconds after transfer then every ten minutes for three hours. The  
786 segments were measured using a FIJI macro that applied “Auto Threshold” (Default),  
787 “Despeckle,” “Remove Outliers” (radius=2 threshold=50 which=Bright), then returned  
788 the “Feret Distance” for each. For each segment at each time point, the Feret distance  
789 was subtracted from the initial Feret distance. The lengths were converted to  $\mu$ m using  
790 the conversion 21.16667  $\mu$ m/pixel. In the second experiment, Col-0 hypocotyls were  
791 dissected first and a second batch was dissected after the other genotypes to test  
792 whether the length of time on DM affected the assay. Measurements for the two  
793 batches were only different at the 20 minute time point ( $p < 0.05$  in two-tailed *t*-test).

794

### 795 **Gravitropism assay**

796 In the experiments corresponding to Figure 7, six-day-old seedlings were  
797 positioned on four 120 mm square plates such that four seedlings of each genotype  
798 were in different positions in the four plates to reduce position effects. The plates were  
799 placed in the growth chamber vertically for an hour, scanned with an Epson V600 flat-

800 bed scanners, then returned to the chamber vertically but rotated 90° from the original  
801 orientation. Plates were re-scanned every 30 minutes for 8 hours. For each root tip at  
802 each time point, the angle was measured in FIJI by drawing a line drawn from the  
803 medial point two-root-widths from the root tip to the root tip. These angles were  
804 corrected for scan-to-scan differences in plate orientation by measuring the angle of a  
805 horizontal line on the plate in each image. The mean changes in root-tip angle from that  
806 at time zero  $\pm$  S.E.M. for each genotype at each timepoint was plotted. The experiments  
807 corresponding to Figure 7—figure supplement 1 were carried out in the same manner  
808 except that each plate contained a single genotype, and the seedlings were not  
809 repositioned onto different plates prior to rotation and scanning.

810

## 811 **ACKNOWLEDGMENTS**

812 We thank Yingluo Wang and Diane Le for technical assistance, Brian Crawford  
813 for help with embryo microscopy, and the Arabidopsis Biological Resource Center and  
814 the US National Plant Germplasm System for seeds. This work was supported by a  
815 grant from the NIH (GM43644 to ME) and by start-up funds from the Salk Institute of  
816 Biological Studies (WB). MP was supported by a long-term postdoctoral fellowship  
817 (LT000340/2019-L) by the Human Frontier Science Program Organization, and NK was  
818 supported in part through a UC San Diego Biological Sciences Eureka! Summer  
819 Research Scholarship. RB was supported by BBSRC Discovery and Future Food  
820 Beacon Nottingham Research Fellowships.

821

## 822 FIGURES AND TABLES

823 **Figure 1.** *tir1/afb* mutant lines exhibit a range of shoot phenotypes. **(A)** The viable  
824 quintuple mutants, *tir1afb1245*, *tir1afb1345*, and *afb12345*, are each approximately half  
825 the height of Col-0 WT, but differ in other phenotypes. Note the curved silique tips of the  
826 *tir1afb1245* mutant (indicative of gynoeceium defects) and the short siliques (due to poor  
827 fertility) of the *afb12345* mutant. **(B)** Lines with only one *TIR1*<sup>+</sup> or one *AFB2*<sup>+</sup> allele  
828 display similar phenotypes regardless of the mutant *tir1* and *afb2* alleles: left to right,  
829 *tir1-1/+ afb2-3 afb1345*, *tir1-1 afb2-3/+ afb1345*, *tir1-10/+ afb2-1 afb1345*, and *tir1-10*  
830 *afb2-1/+ afb1345*. **(C)** Normal siliques (Col-0, left) have two valves containing  
831 developing seeds while 32% of *tir1afb1245* siliques have only one. The adaxial half of  
832 the valve walls were removed to reveal the developing seeds. Scale bars are 1 mm.  
833 Plants were grown for 42 days at 22°C and 16h daylength.

834

835 **Figure 2.** Relative *TIR1/AFB* gene effects. For each of the five phenotype  
836 measurements (Figure 1—figure supplement 4), the normalized mean for each  
837 genotype with the given mutation was subtracted from the normalized mean for the  
838 corresponding genotype lacking that mutation and plotted (circles). The red bars  
839 indicate the median difference attributable to the given mutation. **(A)** Effects of each  
840 mutation on IAA-inhibition of root elongation. For each genotype, twelve five-day-old  
841 seedlings were transferred and grown for three days on media containing 100 nM IAA,  
842 and their average growth was divided by that of twelve seedlings grown on media  
843 lacking added auxin. **(B)** Effects of each mutation on auxin-induced lateral root  
844 production. Twelve five-day-old seedlings for each genotype were grown for four days

845 on media containing 100 nM IAA and the numbers of emerged lateral roots were  
846 counted. (C) Effects of each mutation on the average rosette diameters of five 42-day  
847 old plants. The blue arrowheads indicate difference in phenotypes between the *afb2345*  
848 quadruple mutant and the four triple mutants, and the green arrowheads indicate those  
849 for the *afb12345* quintuple mutant and the five quadruple mutants. (D) Effects of each  
850 mutation on the average height of the primary inflorescences for five 42-day old plants.  
851 (E) Effects of each mutation on the average number of inflorescence branches ( $\geq 1$  cm)  
852 on five 42-day old plants.

853

854 **Figure 3.** Embryo-lethal phenotypes of *tir1/afb* mutant lines. Rows of panels alternate  
855 between defective and normal embryos. Approximately one-quarter of the chloral-  
856 hydrate-cleared embryos from siliques of *afb2/+ tir1afb35* plants did not produce  
857 cotyledon primordia and have over-proliferated suspensors (A) while the remaining  
858 siblings from the same silique appear normal (A'). Embryos from *TIR1/AFB5/AFB2/+*  
859 *tir1afb12345* plants were fixed, stained with SR2200 (cell walls, magenta), and scanned  
860 for fluorescence from the AFB2-mCitrine fusion protein (yellow). All were progeny of  
861 “d2” transgenic line and the standard alleles except panels C and D contained the *tir1-*  
862 *10* and *afb2-1* alleles and panels H' and I were progeny of plants with the “d1”  
863 transgenic line. The embryos in panels B–M are sextuple mutants lacking mCitrine  
864 signal while those in B'–M' are complemented siblings. The embryo stages are 2-cell  
865 (B–C, B'–C'), 8-cell (octant; D, D'), 16-cell (dermatogen; E, E'), early globular (F, F'),  
866 late globular (G–H, G'–H'), late transition (I, I'), heart (J, J'), torpedo (K–L, K'–L'), and  
867 bent cotyledon (M, M'). The yellow cytoplasmic signal in panels I through M likely

868 represents autofluorescence of senescing cells. **(N)** Histogram of the angles of the first  
869 division plane with  $0^\circ$  defined as perpendicular to a line connecting the upper corners of  
870 the hypophysis cell for sextuple (black) and complemented siblings (white). The  
871 average difference was not significantly different ( $p = 0.32$  from  $t$ -test,  $n = 19$  and  $64$ ).  
872 **(O)** Histogram of the angles of lines connecting the upper and lower tiers of octant  
873 embryos from side to center to side (indicated by arrowheads in panels **D**, **D'**). The  
874 means for the sextuple and complemented siblings were  $149.1^\circ$  and  $169.1^\circ$ ,  
875 respectively, and were significantly different ( $p = 1.4 \times 10^{-7}$  from  $t$ -test,  $n = 29$  and  $84$ ). **(P)**  
876 Bar graph showing the frequencies of normal (periclinal) and aberrant (anticlinal,  
877 arrowheads in panel **E**) divisions in 16-cell embryos. While aberrant divisions were  
878 observed in complemented siblings, they were significantly more frequent in sextuple  
879 mutants ( $p = 2.8 \times 10^{-54}$  from Fisher's exact test,  $n = 94$  and  $437$  divisions).

880

881 **Figure 4.** Marker gene expression in the *tir1afb235* embryos. Fluorescence in embryos  
882 from both *afb2/+ tir1afb35 DR5rev:3×Venus-N7* (**A–C**, **E–G**) and *afb2/+ tir1afb35*  
883 *WOX5:GFP<sub>ER</sub>* (**D**, **H**) markers was present in phenotypically normal siblings (**A–D**) but  
884 absent in abnormal (presumed *tir1afb235*) embryos (**E–H**). Fluorescence in embryos  
885 from *tir1/+afb235 PIN1-Venus* plants: normal-phenotype globular embryo (**I**), normal-  
886 phenotype torpedo-stage embryo (**J**), mutant-phenotype globular embryo (**M**) and later-  
887 stage embryo (**N**). Progeny of *tir1/+ afb235 PIN7-Venus* or *afb2/+ tir1afb35 PIN7-GFP*  
888 plants: phenotypically normal globular embryos (**K**, **Q**) mutant globular embryos (**O**, **U**),  
889 and normal (**L**) and mutant (**P**) torpedo-stage embryos. Progeny of *afb2/+ tir1afb35*



890 *NTT-YPet* plants: normal-phenotype globular- (**R–S**) and transition- (**T**) stage embryos,  
891 and mutant embryos (**V–X**). Scale bars: 10  $\mu$ m.

892

893 **Figure 5.** Expression of *TIR1/AFB-mCitrine* translational fusions. (**A–F**) Confocal  
894 images of inflorescence apices from 4-week-old plants containing the specified  
895 *TIR1/AFB-mCitrine* transgenes. (**G–R**) Confocal images of roots of 5-day-old seedlings  
896 under lower magnification (**G–L**) or 7-day-old seedlings under higher magnification (**M–**  
897 **R**). Images in panels **G** and **I–L** used similar microscope settings while those in panel **H**  
898 used less sensitive settings. (**S**) Plot comparing the relative proportions of mCitrine  
899 signal inside the nucleus (gray) and outside the nucleus (white). Cells were imaged and  
900 measured for each *TIR1/AFB-mCitrine* line, and the averages  $\pm$  standard deviations are  
901 shown. For *AFB1-mCitrine*, F1 hybrids with the *UBQ10:H2B-mTurquoise2* nuclear  
902 marker were used so that the nuclei could be delineated (Figure 5—figure supplement  
903 3). The numbers in the bars indicate the number of cells measured and the letters  
904 distinguish significantly different averages (two-tailed *t*-test  $p < 0.05$ ). (**T–Y**) Confocal  
905 images of dermatogen or early globular embryos. mCitrine signal is shown as yellow in  
906 all panels, and cell walls were stained with Calcofluor White M2R (blue; **A–F**), propidium  
907 iodide (magenta; **G–R**), and SCRI Renaissance 2200 (blue; **T–Y**). In panels **M–R**,  
908 mCitrine fluorescence is shown with and without merging with the propidium iodide stain  
909 image. Transgenic lines and genetic backgrounds used: (**A, G, M, S, T**) *tir1-10 TIR1-*  
910 *mCitrine#2*; (**B, H, N, S, U**) *afb1-3 AFB1-mCitrine#7*; (**C, O, V**) *afb2-3 AFB2-mCitrine#3*;  
911 (**I, S**) *afb2-3 AFB2-mCitrine#5*; (**D, J, P, S, W**) *afb3-4 AFB3-mCitrine#1*; (**E, K, Q, S, X**)

912 *afb4-8 AFB4-mCitrine#3*; (**F, L, Y**) *afb5-5 AFB5-mCitrine#19* and (**R, S**) *afb5-5 AFB5-*  
913 *mCitrine#23*. Scale bars equal 25  $\mu\text{m}$  (**A–F**), 50  $\mu\text{m}$  (**G–L**), and 10  $\mu\text{m}$  (**M–R, T–Y**).

914

915 **Figure 6.** The role of *AFB1* in rapid inhibition of root elongation. (**A**) Plot of the root  
916 growth response of different genotypes to 10 nM IAA for 20 minutes. Black circles  
917 represent the response for one single root. Red crosses indicate the mean. Black bars  
918 indicate median. n indicates the number of roots obtained from three independent  
919 experiments. Letters indicate statistical differences according to one-way ANOVA  
920 coupled with post hoc Tukey honestly significant difference (HSD) test ( $p = 0.05$ ). (**B**)  
921 Graph of the root length in  $\mu\text{m}$  according to time in seconds of WT and *afb1* in DMSO  
922 and 10 nM IAA treatments (blue, gray, orange and yellow lines, respectively). Bars  
923 indicates standard deviation of the mean (SEM). n indicates the number of roots  
924 obtained from three independent experiments.

925

926 **Figure 7.** Gravitropic response of *tir1/afb* lines. Sixteen seedlings for each line were  
927 imaged every 30 minutes after rotating the plates 90° and the mean difference in the  
928 root-tip angle from the original angle  $\pm$  SEM are plotted versus time. Col-0 and *afb1-3*  
929 are included in all panels for comparison. Time points at which lines differed from Col-0  
930 are indicated by degree symbols (°) and differences between lines with and without the  
931 *afb1* mutation are indicated by asterisks (\*) of the colors shown in the legend (*t*-test,  $p <$   
932 0.05). Colors: black, Col-0; red, *afb1-3*; blue, *tir1afb345*; purple, *tir1afb1345*; cyan, *tir1-*  
933 *1*; lavender, *tir1-1 afb1-3*; light green, *afb1-3 AFB1-mCitrine#5*; and dark green, *afb1-3*  
934 *AFB1-mCitrine#7*.

935

936 **Figure 8. (Or Graphical Abstract)** Summary of each *TIR1/AFB* gene's contributions to  
937 different responses. The line weights reflect the relative importance for each gene's  
938 roles. The blue lines represent contributions to the rapid IAA-mediated inhibition of root  
939 elongation and the red line with the bar end indicates the antagonistic role observed for  
940 AFB1 in lateral root production.

941

942 **Figure 1—figure supplement 1. TIR1/AFB Phylogeny. (A)** The MrBayes-inferred gene  
943 tree illustrates the relationships between three F-Box-LRR protein families in land  
944 plants. The sources of the sequences are indicated by tip label colors: *Arabidopsis*  
945 *thaliana*, black; other eudicots, gray; monocots, light blue; magnoliids, dark blue; ANITA  
946 grade angiosperms, dark purple; gymnosperms, brown; ferns, red; lycophytes, light  
947 purple; mosses, dark green; liverworts, teal; hornworts, tan; and algae, light green. The  
948 branches leading to the At- $\alpha$  and At- $\beta$  WGDs are indicated by red and blue dots,  
949 respectively. Three clades of TIR1/AFB proteins have well-supported fern sister clades  
950 indicating that first gene duplications in the family predated euphyllophyte radiation.  
951 Note that the position of the lycophyte TIR1/AFBs relative to those of bryophytes and  
952 seed plants was not resolved. **(B)** The graph shows the sum of branch lengths (amino-  
953 acid substitutions per site) from the node joining the Cleomaceae and Brassicaceae  
954 clades to the tip for the *Arabidopsis* member of the clade. **(C)** Gene tree for the TIR1  
955 and AFB1 clades with the parsimoniously inferred relative dates for the appearance of  
956 the three substitutions in the first helix of the F-Box that were shown to interfere with

957 SCF assembly. The *Salvadora AFB1* transcript assembly lacked the sequence  
958 encoding this helix so that ancestor's sequence could not be predicted.

959

960 **Figure 1—figure supplement 2.** Alternate *tir1/afb* alleles. **A**, Diagram of exon/intron  
961 structure showing the locations of each mutation used in this study. T-DNA insertions  
962 are shown as triangles with the arrowheads indicating the locations of left-border  
963 sequences. The box in the third exons indicates the regions targeted by miR393. **B**,  
964 Root elongation inhibition assay of seedlings homozygous or heterozygous ( $F_1$  progeny  
965 of Col-0 crosses) for three *tir1* alleles. Sample sizes were 20-31 per treatment. Two-  
966 tailed *t*-test *p* values: \*,  $\leq 0.05$  and \*\*,  $\leq 0.005$  compared to Col-0; °,  $\leq 0.05$  and °°,  $\leq 0.005$   
967 compared to *tir1-10*; and †,  $\leq 0.05$ ; ††,  $\leq 0.005$  compared to *tir1-10/+*. The *tir1-9* allele  
968 (Ws-2 background) was backcrossed twice to Col-0 and an additional time for *tir1-9/+*.  
969 **C**, 32-day old Col-0, *afb2-3 afb1345*, and *afb2-1 afb1345* plants. **D**, 42-day old Col-0,  
970 *tir1-1 afb1345*, and *tir1-10 afb1345* plants.

971

972 **Figure 1—figure supplement 3.** Summary of phenotypes for mutant combinations. For  
973 the quantitative traits (Figure 1—figure supplement 4), the ranges for each of the  
974 phenotypes were divided into five bins, from "-" to "++++" in increasing severity. NA,  
975 Not applicable (due to embryo or seedling lethality); ND, not determined. The "%  
976 Rootless Embryo" column reflects the percent of rootless and inviable seedlings from  
977 plants grown at 20°C except where noted. The % Siliques Missing Valves column  
978 reflects those missing more than one-third of a valve ( $n = 53$  to 81).

979

980 **Figure 1—figure supplement 4.** Shoot and root phenotypes of *tir1/afb* mutants. The  
981 seedlings/plants were grown in three batches (separated by dashed lines). Average  
982 inflorescence height (**A**) and rosette diameter (**B**) of 42-day-old plants of the given  
983 genotypes. (**C**) Average numbers of inflorescence branches ( $\geq 1$  cm) with the shades of  
984 gray distinguishing branches from primary, secondary, and tertiary inflorescences. In  
985 panels **A–C**,  $n = 5$  plants each except for *afb2*, *tir1afb245*, and Col-0 (batch C) for which  
986  $n = 4$ . (**D**) Average numbers of emerged lateral roots after five days on media lacking  
987 IAA then four days on media containing 100 nM IAA ( $n = 10$ -24 seedlings). (**E**) Inhibition  
988 of root elongation assays. Seedlings were grown for five days on media lacking IAA  
989 then transferred to media containing 20 nM, 100 nM, 500 nM IAA, or DMSO-only control  
990 and grown for three days. Growth during the three days on media containing IAA is  
991 expressed as a percentage of the growth of the same genotype on control plates ( $n = 7$ -  
992 24 seedlings for each treatment). The lines with an asterisk included a cross to an *afb4*-  
993 2 containing line in their pedigrees, and alternate lines never exposed to the TILLING  
994 background were included in the third batch for five of the six such lines. The *afb123*  
995 line included in the first batch—and none of the others—exhibited a long-hypocotyl  
996 phenotype presumably acquired from the *afb4-2* line so it was excluded. The error bars  
997 indicate standard error of the mean (**A–D**) or the relative standard error of the ratio (**E**).  
998

999 **Figure 1—figure supplement 5.** Embryonic root formation in *tir1/afb* mutants. **A**,  
1000 representative seedlings of *tir1afb23* mutants with and without roots. **B**, four *tir1afb1245*  
1001 seedlings with (left) and without roots (three on right), **C**, four rootless *tir1afb234*  
1002 mutants. **D**, graph showing the percent of seedlings of different genotypes lacking roots

1003 (dark gray) or not germinating (light gray). The temperatures indicate the conditions in  
1004 which the parents were grown, Percival growth chambers set to 17°C or 20°C or an  
1005 environmental room with temperatures between 22°C and 23°C. For *tir1afb234* and  
1006 *tir1afb1234*, adventitious roots needed to be induced with a 3-day treatment on 10 µM  
1007 NAA before transplanting to soil and growing for seed collection in a different Percival  
1008 chamber set to 22°C. Error bars indicate standard error of the mean for progeny of four  
1009 different parents of the given genotype/temperature combination. For the Fisher's exact  
1010 tests, all four families' tallies were combined, from 142–255 seeds per  
1011 genotype/condition were tested. \*, Different from 20°C for the same genotype using  
1012 Fisher's exact test,  $p < 0.001$ . †, Different from *tir1afb23* using Fisher's exact test,  $p <$   
1013 0.01.

1014

1015 **Figure 3—figure supplement 1.** Transgene complementing the *tir1afb12345* sextuple  
1016 mutant. **A**, diagram of the Transfer-DNA region of pMP1855 containing genomic regions  
1017 of *TIR1*, *AFB5*, and *AFB2* fused to *mOrange2*, *mCherry*, and *mCitrine*, respectively.  
1018 BAR, Basta- (phosphinothricin-) resistance gene flanked by the *Agrobacterium nopaline*  
1019 *synthase* promoter and terminator. **B–D**, confocal images of a globular-stage embryo  
1020 from a *TIR1/AFB5/AFB2 #d2/d2* plant detecting mOrange2 (**B**), mCherry, (**C**), and  
1021 mCitrine (**D**). **E–F**, phenotypes of a 32-day-old WT Col-0 plant and a *tir1afb12345* plant  
1022 hemizygous for the *TIR1/AFB5/AFB2 #d2* transgene of the same age.

1023

1024 **Figure 3—figure supplement 2.** Appearance of autofluorescence in sextuple mutant  
1025 embryos. Torpedo-stage transgene-complemented sextuple mutant (**A**) and sextuple

1026 mutants equivalent to between early torpedo to bent-cotyledon stages (**B–D**) were  
1027 imaged using similar microscope settings for SR2200 stain (blue), mCitrine (yellow),  
1028 mOrange2 (orange), and mCherry (red). In the mutants, autofluorescence appears in all  
1029 three fluorescent protein channels in the same patterns albeit much less intensely in the  
1030 YFP channel. The settings for YFP were much less sensitive than the others because  
1031 AFB2-mCitrine was much brighter than TIR1-mOrange2 and AFB5-mCherry (likely due  
1032 to dimmer fluorescent proteins with much slower maturation rates as well as lower  
1033 expression levels). Scale bars are 10  $\mu$ m.

1034

1035 **Figure 3—figure supplement 3.** Plants of the given genotype were used in crosses to  
1036 wild type (Col-0) as either the pollen donor ( $\sigma^7$ ) or the recipient ( $\text{♀}$ ). The progeny were  
1037 sprayed with herbicide to identify F<sub>1</sub> progeny inheriting the transgene. The Chi-squared  
1038 tests compared the observed numbers of sextuple and complemented-sextuple  
1039 gametophytes to the expected 1:1 ratio.

1040

1041 **Figure 5—figure supplement 1. (A)** Comparison of 42-day old Col-0, *tir1afb23*, *afb23*,  
1042 and *tir1afb23 TIR1-mCitrine#2* plants. **(B)** Comparison of 42-day old Col-0, *tir1afb1245*,  
1043 *tir1afb145*, and *tir1afb1245 AFB2-mCitrine#5* plant phenotypes. **(C)** Comparison of 42-  
1044 day old Col-0, *tir1afb23*, *tir1afb2*, and *tir1afb23 AFB3-mCitrine#1* plant phenotypes.  
1045 Each of the transgenes complements the silique and inflorescence height phenotypes.  
1046 **D** Sensitivities of *AFB4*-expressing transgenic lines to picloram. Root elongation was  
1047 measured for seedlings grown on media containing 20  $\mu$ M picloram, expressed as a  
1048 percentage of elongation on media lacking picloram. Lines *AFB4-mCitrine#3* and *AFB4-*

1049 *tdTomato#16* are more sensitive to picloram than WT indicating that the transgene is  
1050 likely expressed at higher levels than the endogenous *AFB4* locus. Sample sizes were  
1051 15-16 per line per treatment. Error bars show the SE of the ratio. Letters at top  
1052 distinguish lines with different responses to picloram (*t*-test,  $p < 0.05$ ).

1053

1054 **Figure 5—figure supplement 2.** Comparison of *TIR1/AFB-mCitrine* lines. Roots of 5-  
1055 day-old seedlings for two different lines are shown with a merged image of propidium  
1056 iodide (magenta) and the fluorescent signal of mCitrine (yellow) or mEGFP (green) on  
1057 the left and fluorescent signal alone on the right. **A**, *TIR1-mCitrine#2*; **B**, *TIR1-*  
1058 *mCitrine#4*; **C**, *AFB1-mCitrine#7*; **D**, *AFB1-mCitrine #5*; **E**, *AFB2-mCitrine#5*; **F**, *AFB2-*  
1059 *mCitrine#3*; **G**, *AFB3-mCitrine#1*; **H**, *AFB3-mEGFP#2*; **I**, *AFB4-mCitrine#1*; **J**, *AFB4-*  
1060 *mCitrine#3*; **K**, *AFB5-mCitrine#23*; and **L**, *AFB5-mCitrine#9*. The first line for each gene  
1061 is the same as shown in Figure 5 panels G–L. The numbers in the lower left corner  
1062 indicate similar microscope settings from 1 (least sensitive) to 4 (most sensitive). Scale  
1063 bars equal 25  $\mu\text{m}$ .

1064

1065 **Figure 5—figure supplement 3.** AFB1-mCitrine expression is unchanged in  $F_1$  hybrids  
1066 used for signal quantification. Images of root epidermal cells in the elongation zone from  
1067 7-day-old seedlings are shown for the fluorescent signal of AFB1-mCitrine (yellow),  
1068 propidium iodide (magenta) and mTurquoise2 (cyan), and a merged image. In panel **C**,  
1069 the mTurquoise2 signal is included in cyan. **A**, *afb1-3 AFB1-mCitrine#7*  $\times$  *UBQ10:H2B-*  
1070 *2xmTurquoise2*  $F_1$  and **B**, *afb1-3 AFB1-mCitrine#7*. Scale bars equal 10  $\mu\text{m}$ .

1071



1072 **Figure 6—figure supplement 1.** Time courses of root elongation. Graph of the root  
1073 length in  $\mu\text{m}$  versus time in seconds with DMSO and 10 nM IAA treatments (blue and  
1074 orange lines, respectively) in wild type (a), *afb1* (b), *tir1afb1* (c), *tir1afb12* (d), *tir1afb13*  
1075 (e), *tir1afb135* (f), *tir1afb134* (g), *tir1afb1245* (h), *tir1afb1345* (i), *afb1 AFB1-mCitrine#7*  
1076 (j), *tir1* (k), *afb23* (l), *afb45* (m), *tir1afb2* (n), *tir1afb3* (o), *tir1afb23* (p), *tir1afb345* (q).  
1077 Bars indicate standard deviation of the mean (SEM). Blue region indicates no  
1078 differences between the length of treated and non-treated conditions while pale orange  
1079 indicates significant difference according to two ways *t*-test ( $p = 0.05$ ). n indicates the  
1080 number of roots imaged in three independent experiments.

1081

1082 **Figure 6—figure supplement 2.** Movie of wild type root tip with mock (DMSO, left  
1083 panel) and 10 nM IAA (right panel) treatments. Images were acquired every 25 seconds  
1084 for 20 minutes. Scale bar 100  $\mu\text{m}$ .

1085

1086 **Figure 6—figure supplement 3.** Movie of *afb1-3* root tip with mock (DMSO, left panel)  
1087 and 10 nM IAA (right panel) treatments. Images were acquired every 25 seconds for 20  
1088 minutes. Scale bar 100  $\mu\text{m}$ .

1089

1090 **Figure 6—figure supplement 4.** Graphs showing changes in length of hypocotyl  
1091 segments treated with 5  $\mu\text{M}$  NAA or 0.025% ethanol (Controls) for three hours. The  
1092 genotypes shown on the right correspond to the nearest curve with NAA treatment at  
1093 the 180 minute timepoint. The curves for the control treatment are not labeled. Error  
1094 bars show standard error of the mean. For pairwise *t*-test  $p$  values for each treated

1095 genotype at each time point, see Supplemental File 5. The experiments shown in  
1096 panels **A** and **B** were done on different days.

1097

1098 **Figure 7—figure supplement 1.** Gravitropic response of *tir1/afb* lines, repeat  
1099 experiment. Seedlings for each line were imaged every 30 minutes after rotating the  
1100 plates 90° and the mean difference in the root-tip angle from the original angle ± SEM  
1101 are plotted versus time. Col-0 and *afb1-3* are included in all panels for comparison.  
1102 Time points at which lines differed from Col-0 are indicated by degree symbols (°) and  
1103 differences between lines with and without the *afb1* mutation are indicated by asterisks  
1104 (\*) of the colors shown in the legend (*t*-test,  $p < 0.05$ ). Colors (sample size): black, Col-0  
1105 (33); red, *afb1-3* (24); blue, *tir1afb345* (42); purple, *tir1afb1345* (41); cyan, *tir1-1* (39);  
1106 lavender, *tir1-1 afb1-3* (40); light green, *afb1-3 AFB1-mCitrine#5* (39); and dark green,  
1107 *afb1-3 AFB1-mCitrine#7* (41).

1108

1109 **Supplementary File 1.** List of databases for the sequences used in making the gene  
1110 trees.

1111 **Supplementary File 2.** List of primers used for cloning and genotyping.

1112 **Supplementary File 3.** Nexus file for inferring the F-Box-LRR family tree.

1113 **Supplementary File 4.** Nexus file for inferring the TIR1+AFB1 tree.

1114 **Supplementary File 6.** Time Lapse Analysis 20 Minute Macro

## REFERENCES

- Alonso JM, Stepanova AN, Solano R, Wisman E, Ferrari S, Ausubel FM, Ecker JR. 2003. Five components of the ethylene-response pathway identified in a screen for *weak ethylene-insensitive* mutants in *Arabidopsis*. *Proc Natl Acad Sci U S A* **100**: 2992-2997.
- Berleth T, Jürgens G. 1993. The Role of the *monopteros* Gene in Organizing the Basal Body Region of the *Arabidopsis* Embryo. *Development* **118**: 575-587.
- Bhatia N, Ahl H, Jonsson H, Heisler MG. 2019. Quantitative analysis of auxin sensing in leaf primordia argues against proposed role in regulating leaf dorsoventrality. *Elife* **8**.
- Blilou I, Xu J, Wildwater M, Willemsen V, Paponov I, Friml J, Heidstra R, Aida M, Palme K, Scheres B. 2005. The PIN auxin efflux facilitator network controls growth and patterning in *Arabidopsis* roots. *Nature* **433**: 39-44.
- Bowman JL, Briginshaw LN, Fisher TJ, Flores-Sandoval E. 2018. Something ancient and something neofunctionalized-evolution of land plant hormone signaling pathways. *Curr Opin Plant Biol* **47**: 64-72.
- Brunoud G, Wells DM, Oliva M, Larrieu A, Mirabet V, Burrow AH, Beeckman T, Kepinski S, Traas J, Bennett MJ et al. 2012. A novel sensor to map auxin response and distribution at high spatio-temporal resolution. *Nature* **482**: 103-106.
- Calderón Villalobos LI, Lee S, De Oliveira C, Ivetac A, Brandt W, Armitage L, Sheard LB, Tan X, Parry G, Mao H et al. 2012. A combinatorial TIR1/AFB-Aux/IAA co-receptor system for differential sensing of auxin. *Nat Chem Biol* **8**: 477-485.
- Cheng Y, Dai X, Zhao Y. 2007. Auxin synthesized by the YUCCA flavin monooxygenases is essential for embryogenesis and leaf formation in *Arabidopsis*. *Plant Cell* **19**: 2430-2439.
- Clark JW, Donoghue PCJ. 2018. Whole-Genome Duplication and Plant Macroevolution. *Trends Plant Sci* **23**: 933-945.
- Clough SJ, Bent AF. 1998. Floral dip: a simplified method for *Agrobacterium*-mediated transformation of *Arabidopsis thaliana*. *Plant J* **16**: 735-743.
- Crawford BC, Sewell J, Golembeski G, Roshan C, Long JA, Yanofsky MF. 2015. Genetic control of distal stem cell fate within root and embryonic meristems. *Science* **347**: 655-659.
- Delker C, Poschl Y, Raschke A, Ullrich K, Eттingshausen S, Hauptmann V, Grosse I, Quint M. 2010. Natural variation of transcriptional auxin response networks in *Arabidopsis thaliana*. *Plant Cell* **22**: 2184-2200.
- Dezfulian MH, Jalili E, Roberto DK, Moss BL, Khoo K, Nemhauser JL, Crosby WL. 2016. Oligomerization of SCFTIR1 Is Essential for Aux/IAA Degradation and Auxin Signaling in *Arabidopsis*. *PLoS Genet* **12**: e1006301.
- Dharmasiri N, Dharmasiri S, Weijers D, Lechner E, Yamada M, Hobbie L, Ehrismann JS, Jürgens G, Estelle M. 2005. Plant development is regulated by a family of auxin receptor F box proteins. *Dev Cell* **9**: 109-119.
- Dindas J, Scherzer S, Roelfsema MRG, von Meyer K, Muller HM, Al-Rasheid KAS, Palme K, Dietrich P, Becker D, Bennett MJ et al. 2018. AUX1-mediated root hair

- auxin influx governs SCF(TIR1/AFB)-type Ca(2+) signaling. *Nat Commun* **9**: 1174.
- Edger PP, Hall JC, Harkess A, Tang M, Coombs J, Mohammadin S, Schranz ME, Xiong Z, Leebens-Mack J, Meyers BC et al. 2018. Brassicales phylogeny inferred from 72 plastid genes: A reanalysis of the phylogenetic localization of two paleopolyploid events and origin of novel chemical defenses. *Am J Bot* **105**: 463-469.
- Edwards K, Johnstone C, Thompson C. 1991. A simple and rapid method for the preparation of plant genomic DNA for PCR analysis. *Nucleic Acids Res* **19**: 1349.
- Fendrych M, Akhmanova M, Merrin J, Glanc M, Hagihara S, Takahashi K, Uchida N, Torii KU, Friml J. 2018. Rapid and reversible root growth inhibition by TIR1 auxin signalling. *Nat Plants* **4**: 453-459.
- Fendrych M, Leung J, Friml J. 2016. TIR1/AFB-Aux/IAA auxin perception mediates rapid cell wall acidification and growth of *Arabidopsis* hypocotyls. *Elife* **5**.
- Franklin KA, Quail PH. 2010. Phytochrome functions in *Arabidopsis* development. *J Exp Bot* **61**: 11-24.
- Friml J, Vieten A, Sauer M, Weijers D, Schwarz H, Hamann T, Offringa R, Jürgens G. 2003. Efflux-dependent auxin gradients establish the apical-basal axis of *Arabidopsis*. *Nature* **426**: 147-153.
- Goedhart J, von Stetten D, Noirclerc-Savoye M, Lelimosin M, Joosen L, Hink MA, van Weeren L, Gadella TW, Jr., Royant A. 2012. Structure-guided evolution of cyan fluorescent proteins towards a quantum yield of 93%. *Nat Commun* **3**: 751.
- Goodstein DM, Shu S, Howson R, Neupane R, Hayes RD, Fazo J, Mitros T, Dirks W, Hellsten U, Putnam N et al. 2012. Phytozome: a comparative platform for green plant genomics. *Nucleic Acids Res* **40**: D1178-1186.
- Griesbeck O, Baird GS, Campbell RE, Zacharias DA, Tsien RY. 2001. Reducing the environmental sensitivity of yellow fluorescent protein. Mechanism and applications. *J Biol Chem* **276**: 29188-29194.
- Guan C, Du F, Xiong Y, Jiao Y. 2019. The 35S promoter-driven mDII auxin control sensor is uniformly distributed in leaf primordia. *J Integr Plant Biol* **61**: 1114-1120.
- Hamann T, Benková E, Bäurle I, Kientz M, Jürgens G. 2002. The *Arabidopsis* *BODENLOS* gene encodes an auxin response protein inhibiting MONOPTEROS-mediated embryo patterning. *Genes Dev* **16**: 1610-1615.
- Hamann T, Mayer U, Jürgens G. 1999. The auxin-insensitive *bodenlos* mutation affects primary root formation and apical-basal patterning in the *Arabidopsis* embryo. *Development* **126**: 1387-1395.
- Hardtke CS, Berleth T. 1998. The *Arabidopsis* gene *MONOPTEROS* encodes a transcription factor mediating embryo axis formation and vascular development. *EMBO J* **17**: 1405-1411.
- Heisler MG, Ohno C, Das P, Sieber P, Reddy GV, Long JA, Meyerowitz EM. 2005. Patterns of auxin transport and gene expression during primordium development revealed by live imaging of the *Arabidopsis* inflorescence meristem. *Curr Biol* **15**: 1899-1911.

- Hori K, Maruyama F, Fujisawa T, Togashi T, Yamamoto N, Seo M, Sato S, Yamada T, Mori H, Tajima N et al. 2014. *Klebsormidium flaccidum* genome reveals primary factors for plant terrestrial adaptation. *Nat Commun* **5**: 3978.
- Jaillais Y, Hothorn M, Belkhadir Y, Dabi T, Nimchuk ZL, Meyerowitz EM, Chory J. 2011. Tyrosine phosphorylation controls brassinosteroid receptor activation by triggering membrane release of its kinase inhibitor. *Genes Dev* **25**: 232-237.
- Jaillon O, Aury JM, Noel B, Policriti A, Clepet C, Casagrande A, Choisne N, Aubourg S, Vitulo N, Jubin C et al. 2007. The grapevine genome sequence suggests ancestral hexaploidization in major angiosperm phyla. *Nature* **449**: 463-467.
- Jiao Y, Wickett NJ, Ayyampalayam S, Chanderbali AS, Landherr L, Ralph PE, Tomsho LP, Hu Y, Liang H, Soltis PS et al. 2011. Ancestral polyploidy in seed plants and angiosperms. *Nature* **473**: 97-100.
- Johnson MT, Carpenter EJ, Tian Z, Bruskiwich R, Burris JN, Carrigan CT, Chase MW, Clarke ND, Covshoff S, Depamphilis CW et al. 2012. Evaluating methods for isolating total RNA and predicting the success of sequencing phylogenetically diverse plant transcriptomes. *PLoS One* **7**: e50226.
- Jones-Rhoades MW, Bartel DP. 2004. Computational identification of plant microRNAs and their targets, including a stress-induced miRNA. *Mol Cell* **14**: 787-799.
- Kagale S, Koh C, Nixon J, Bollina V, Clarke WE, Tuteja R, Spillane C, Robinson SJ, Links MG, Clarke C et al. 2014. The emerging biofuel crop *Camelina sativa* retains a highly undifferentiated hexaploid genome structure. *Nat Commun* **5**: 3706.
- Karimi M, Depicker A, Hilson P. 2007. Recombinational cloning with plant gateway vectors. *Plant Physiol* **145**: 1144-1154.
- Kurihara D, Mizuta Y, Sato Y, Higashiyama T. 2015. ClearSee: a rapid optical clearing reagent for whole-plant fluorescence imaging. *Development* **142**: 4168-4179.
- Lavy M, Estelle M. 2016. Mechanisms of auxin signaling. *Development* **143**: 3226-3229.
- Lee S, Sundaram S, Armitage L, Evans JP, Hawkes T, Kepinski S, Ferro N, Napier RM. 2014. Defining binding efficiency and specificity of auxins for SCF(TIR1/AFB)-Aux/IAA co-receptor complex formation. *ACS Chem Biol* **9**: 673-682.
- Li L, Krens SFG, Fendrych M, Friml J. 2018. Real-time Analysis of Auxin Response, Cell Wall pH and Elongation in *Arabidopsis thaliana* Hypocotyls. *Bio Protoc* **8**: e2685.
- Liao CY, Smet W, Brunoud G, Yoshida S, Vernoux T, Weijers D. 2015. Reporters for sensitive and quantitative measurement of auxin response. *Nat Methods* **12**: 207-210, 202 p following 210.
- Ligerot Y, de Saint Germain A, Waldie T, Troadec C, Citerne S, Kadakia N, Pillot JP, Prigge M, Aubert G, Bendahmane A et al. 2017. The pea branching *RMS2* gene encodes the PsAFB4/5 auxin receptor and is involved in an auxin-strigolactone regulation loop. *PLoS Genet* **13**: e1007089.
- Lituiev DS, Krohn NG, Müller B, Jackson D, Hellriegel B, Dresselhaus T, Grossniklaus U. 2013. Theoretical and experimental evidence indicates that there is no detectable auxin gradient in the angiosperm female gametophyte. *Development* **140**: 4544-4553.



- Liu Z, Miao L, Huo R, Song X, Johnson C, Kong L, Sundaresan V, Yu X. 2018. ARF2-ARF4 and ARF5 are Essential for Female and Male Gametophyte Development in Arabidopsis. *Plant Cell Physiol* **59**: 179-189.
- Lynch M, Conery JS. 2000. The evolutionary fate and consequences of duplicate genes. *Science* **290**: 1151-1155.
- . 2003. The evolutionary demography of duplicate genes. *J Struct Funct Genomics* **3**: 35-44.
- Maddison WP, Maddison DR. 2018. Mesquite: a modular system for evolutionary analysis. Version 3.51.
- Matasci N, Hung LH, Yan Z, Carpenter EJ, Wickett NJ, Mirarab S, Nguyen N, Warnow T, Ayyampalayam S, Barker M et al. 2014. Data access for the 1,000 Plants (1KP) project. *Gigascience* **3**: 17.
- Morris JL, Puttick MN, Clark JW, Edwards D, Kenrick P, Pressel S, Wellman CH, Yang Z, Schneider H, Donoghue PCJ. 2018. The timescale of early land plant evolution. *Proc Natl Acad Sci U S A* **115**: E2274-E2283.
- Mutte SK, Kato H, Rothfels C, Melkonian M, Wong GK, Weijers D. 2018. Origin and evolution of the nuclear auxin response system. *Elife* **7**: e33399.
- Navarro L, Dunoyer P, Jay F, Arnold B, Dharmasiri N, Estelle M, Voinnet O, Jones JD. 2006. A plant miRNA contributes to antibacterial resistance by repressing auxin signaling. *Science* **312**: 436-439.
- Notredame C, Higgins DG, Heringa J. 2000. T-Coffee: A novel method for fast and accurate multiple sequence alignment. *J Mol Biol* **302**: 205-217.
- One Thousand Plant Transcriptomes I. 2019. One thousand plant transcriptomes and the phylogenomics of green plants. *Nature* **574**: 679-685.
- Pagnussat GC, Alandete-Saez M, Bowman JL, Sundaresan V. 2009. Auxin-dependent patterning and gamete specification in the Arabidopsis female gametophyte. *Science* **324**: 1684-1689.
- Palovaara J, de Zeeuw T, Weijers D. 2016. Tissue and Organ Initiation in the Plant Embryo: A First Time for Everything. *Annu Rev Cell Dev Biol* **32**: 47-75.
- Panchy N, Lehti-Shiu M, Shiu SH. 2016. Evolution of Gene Duplication in Plants. *Plant Physiol* **171**: 2294-2316.
- Panoli A, Martin MV, Alandete-Saez M, Simon M, Neff C, Swarup R, Bellido A, Yuan L, Pagnussat GC, Sundaresan V. 2015. Auxin Import and Local Auxin Biosynthesis Are Required for Mitotic Divisions, Cell Expansion and Cell Specification during Female Gametophyte Development in Arabidopsis thaliana. *PLoS One* **10**: e0126164.
- Parry G, Calderón-Villalobos LI, Prigge M, Péret B, Dharmasiri S, Itoh H, Lechner E, Gray WM, Bennett M, Estelle M. 2009. Complex regulation of the TIR1/AFB family of auxin receptors. *Proc Natl Acad Sci U S A* **106**: 22540-22545.
- Prigge MJ, Greenham K, Zhang Y, Santner A, Castillejo C, Mutka AM, O'Malley RC, Ecker JR, Kunkel BN, Estelle M. 2016. The Arabidopsis Auxin Receptor F-Box Proteins AFB4 and AFB5 Are Required for Response to the Synthetic Auxin Picloram. *G3 (Bethesda)* **6**: 1383-1390.
- Prigge MJ, Lavy M, Ashton NW, Estelle M. 2010. *Physcomitrella patens* auxin-resistant mutants affect conserved elements of an auxin-signaling pathway. *Curr Biol* **20**: 1907-1912.

- Prigge MJ, Otsuga D, Alonso JM, Ecker JR, Drews GN, Clark SE. 2005. Class III homeodomain-leucine zipper gene family members have overlapping, antagonistic, and distinct roles in Arabidopsis development. *Plant Cell* **17**: 61-76.
- Pucciariello O, Legris M, Costigliolo Rojas C, Iglesias MJ, Hernando CE, Dezar C, Vazquez M, Yanovsky MJ, Finlayson SA, Prat S et al. 2018. Rewiring of auxin signaling under persistent shade. *Proc Natl Acad Sci U S A* **115**: 5612-5617.
- Rademacher EH, Lokerse AS, Schlereth A, Llavata-Peris CI, Bayer M, Kientz M, Freire Rios A, Borst JW, Lukowitz W, Jürgens G et al. 2012. Different auxin response machineries control distinct cell fates in the early plant embryo. *Dev Cell* **22**: 211-222.
- Rambaut A. 2018. FigTree v1.4.4 (<http://tree.bio.ed.ac.uk/software/figtree/>).
- Rast-Somssich MI, Žádníková P, Schmid S, Kieffer M, Kepinski S, Simon R. 2017. The Arabidopsis JAGGED LATERAL ORGANS (JLO) gene sensitizes plants to auxin. *J Exp Bot* **68**: 2741-2755.
- Remington DL, Vision TJ, Guilfoyle TJ, Reed JW. 2004. Contrasting modes of diversification in the *Aux/IAA* and *ARF* gene families. *Plant Physiol* **135**: 1738-1752.
- Rensing SA, Lang D, Zimmer AD, Terry A, Salamov A, Shapiro H, Nishiyama T, Perroud PF, Lindquist EA, Kamisugi Y et al. 2008. The *Physcomitrella* genome reveals evolutionary insights into the conquest of land by plants. *Science* **319**: 64-69.
- Robert HS, Grunewald W, Sauer M, Cannoot B, Soriano M, Swarup R, Weijers D, Bennett M, Boutilier K, Friml J. 2015. Plant embryogenesis requires AUX/LAX-mediated auxin influx. *Development* **142**: 702-711.
- Ronquist F, Teslenko M, van der Mark P, Ayres DL, Darling A, Hohna S, Larget B, Liu L, Suchard MA, Huelsenbeck JP. 2012. MrBayes 3.2: efficient Bayesian phylogenetic inference and model choice across a large model space. *Syst Biol* **61**: 539-542.
- Roychoudhry S, Kieffer M, Del Bianco M, Liao CY, Weijers D, Kepinski S. 2017. The developmental and environmental regulation of gravitropic setpoint angle in Arabidopsis and bean. *Sci Rep* **7**: 42664.
- Ruegger M, Dewey E, Gray WM, Hobbie L, Turner J, Estelle M. 1998. The TIR1 protein of *Arabidopsis* functions in auxin response and is related to human SKP2 and yeast *grr1p*. *Genes Dev* **12**: 198-207.
- Ruegger M, Dewey E, Hobbie L, Brown D, Bernasconi P, Turner J, Muday G, Estelle M. 1997. Reduced naphthylphthalamic acid binding in the *tir3* mutant of Arabidopsis is associated with a reduction in polar auxin transport and diverse morphological defects. *Plant Cell* **9**: 745-757.
- Sato EM, Hijazi H, Bennett MJ, Vissenberg K, Swarup R. 2015. New insights into root gravitropic signalling. *J Exp Bot* **66**: 2155-2165.
- Schindelin J, Arganda-Carreras I, Frise E, Kaynig V, Longair M, Pietzsch T, Preibisch S, Rueden C, Saalfeld S, Schmid B et al. 2012. Fiji: an open-source platform for biological-image analysis. *Nat Methods* **9**: 676-682.
- Schneider CA, Rasband WS, Eliceiri KW. 2012. NIH Image to ImageJ: 25 years of image analysis. *Nat Methods* **9**: 671-675.

- Schranz ME, Mitchell-Olds T. 2006. Independent ancient polyploidy events in the sister families Brassicaceae and Cleomaceae. *Plant Cell* **18**: 1152-1165.
- Shaner NC, Campbell RE, Steinbach PA, Giepmans BN, Palmer AE, Tsien RY. 2004. Improved monomeric red, orange and yellow fluorescent proteins derived from *Discosoma* sp. red fluorescent protein. *Nat Biotechnol* **22**: 1567-1572.
- Shaner NC, Lin MZ, McKeown MR, Steinbach PA, Hazelwood KL, Davidson MW, Tsien RY. 2008. Improving the photostability of bright monomeric orange and red fluorescent proteins. *Nat Methods* **5**: 545-551.
- Shih HW, DePew CL, Miller ND, Monshausen GB. 2015. The Cyclic Nucleotide-Gated Channel CNGC14 Regulates Root Gravitropism in *Arabidopsis thaliana*. *Curr Biol* **25**: 3119-3125.
- Simon ML, Platre MP, Assil S, van Wijk R, Chen WY, Chory J, Dreux M, Munnik T, Jaillais Y. 2014. A multi-colour/multi-affinity marker set to visualize phosphoinositide dynamics in *Arabidopsis*. *Plant J* **77**: 322-337.
- Simonini S, Deb J, Moubayidin L, Stephenson P, Valluru M, Freire-Rios A, Sorefan K, Weijers D, Friml J, Østergaard L. 2016. A noncanonical auxin-sensing mechanism is required for organ morphogenesis in *Arabidopsis*. *Genes Dev* **30**: 2286-2296.
- Stepanova AN, Robertson-Hoyt J, Yun J, Benavente LM, Xie DY, Doležal K, Schlereth A, Jürgens G, Alonso JM. 2008. *TAA1*-mediated auxin biosynthesis is essential for hormone crosstalk and plant development. *Cell* **133**: 177-191.
- Strasser B, Sánchez-Lamas M, Yanovsky MJ, Casal JJ, Cerdán PD. 2010. *Arabidopsis thaliana* life without phytochromes. *Proc Natl Acad Sci U S A* **107**: 4776-4781.
- Ursache R, Andersen TG, Marhavy P, Geldner N. 2018. A protocol for combining fluorescent proteins with histological stains for diverse cell wall components. *Plant J* **93**: 399-412.
- Vidal EA, Araus V, Lu C, Parry G, Green PJ, Coruzzi GM, Gutiérrez RA. 2010. Nitrate-responsive miR393/*AFB3* regulatory module controls root system architecture in *Arabidopsis thaliana*. *Proc Natl Acad Sci U S A* **107**: 4477-4482.
- Walsh TA, Neal R, Merlo AO, Honma M, Hicks GR, Wolff K, Matsumura W, Davies JP. 2006. Mutations in an auxin receptor homolog *AFB5* and in *SGT1b* confer resistance to synthetic picolinate auxins and not to 2,4-dichlorophenoxyacetic acid or indole-3-acetic acid in *Arabidopsis*. *Plant Physiol* **142**: 542-552.
- Wang R, Zhang Y, Kieffer M, Yu H, Kepinski S, Estelle M. 2016. HSP90 regulates temperature-dependent seedling growth in *Arabidopsis* by stabilizing the auxin co-receptor F-box protein TIR1. *Nat Commun* **7**: 10269.
- Wickett NJ, Mirarab S, Nguyen N, Warnow T, Carpenter E, Matasci N, Ayyampalayam S, Barker MS, Burleigh JG, Gitzendanner MA et al. 2014. Phylotranscriptomic analysis of the origin and early diversification of land plants. *Proc Natl Acad Sci U S A* **111**: E4859-4868.
- Wright RC, Zahler ML, Gerben SR, Nemhauser JL. 2017. Insights into the Evolution and Function of Auxin Signaling F-Box Proteins in *Arabidopsis thaliana* Through Synthetic Analysis of Natural Variants. *Genetics* **207**: 583-591.
- Xie Y, Wu G, Tang J, Luo R, Patterson J, Liu S, Huang W, He G, Gu S, Li S et al. 2014. SOAPdenovo-Trans: de novo transcriptome assembly with short RNA-Seq reads. *Bioinformatics* **30**: 1660-1666.



- Yu H, Zhang Y, Moss BL, Bargmann BO, Wang R, Prigge M, Nemhauser JL, Estelle M. 2015. Untethering the TIR1 auxin receptor from the SCF complex increases its stability and inhibits auxin response. *Nat Plants* **1**.
- Zhang Y, Xiao G, Wang X, Zhang X, Friml J. 2019. Evolution of fast root gravitropism in seed plants. *Nat Commun* **10**: 3480.
- Zhou R, Benavente LM, Stepanova AN, Alonso JM. 2011. A recombineering-based gene tagging system for Arabidopsis. *Plant J* **66**: 712-723.

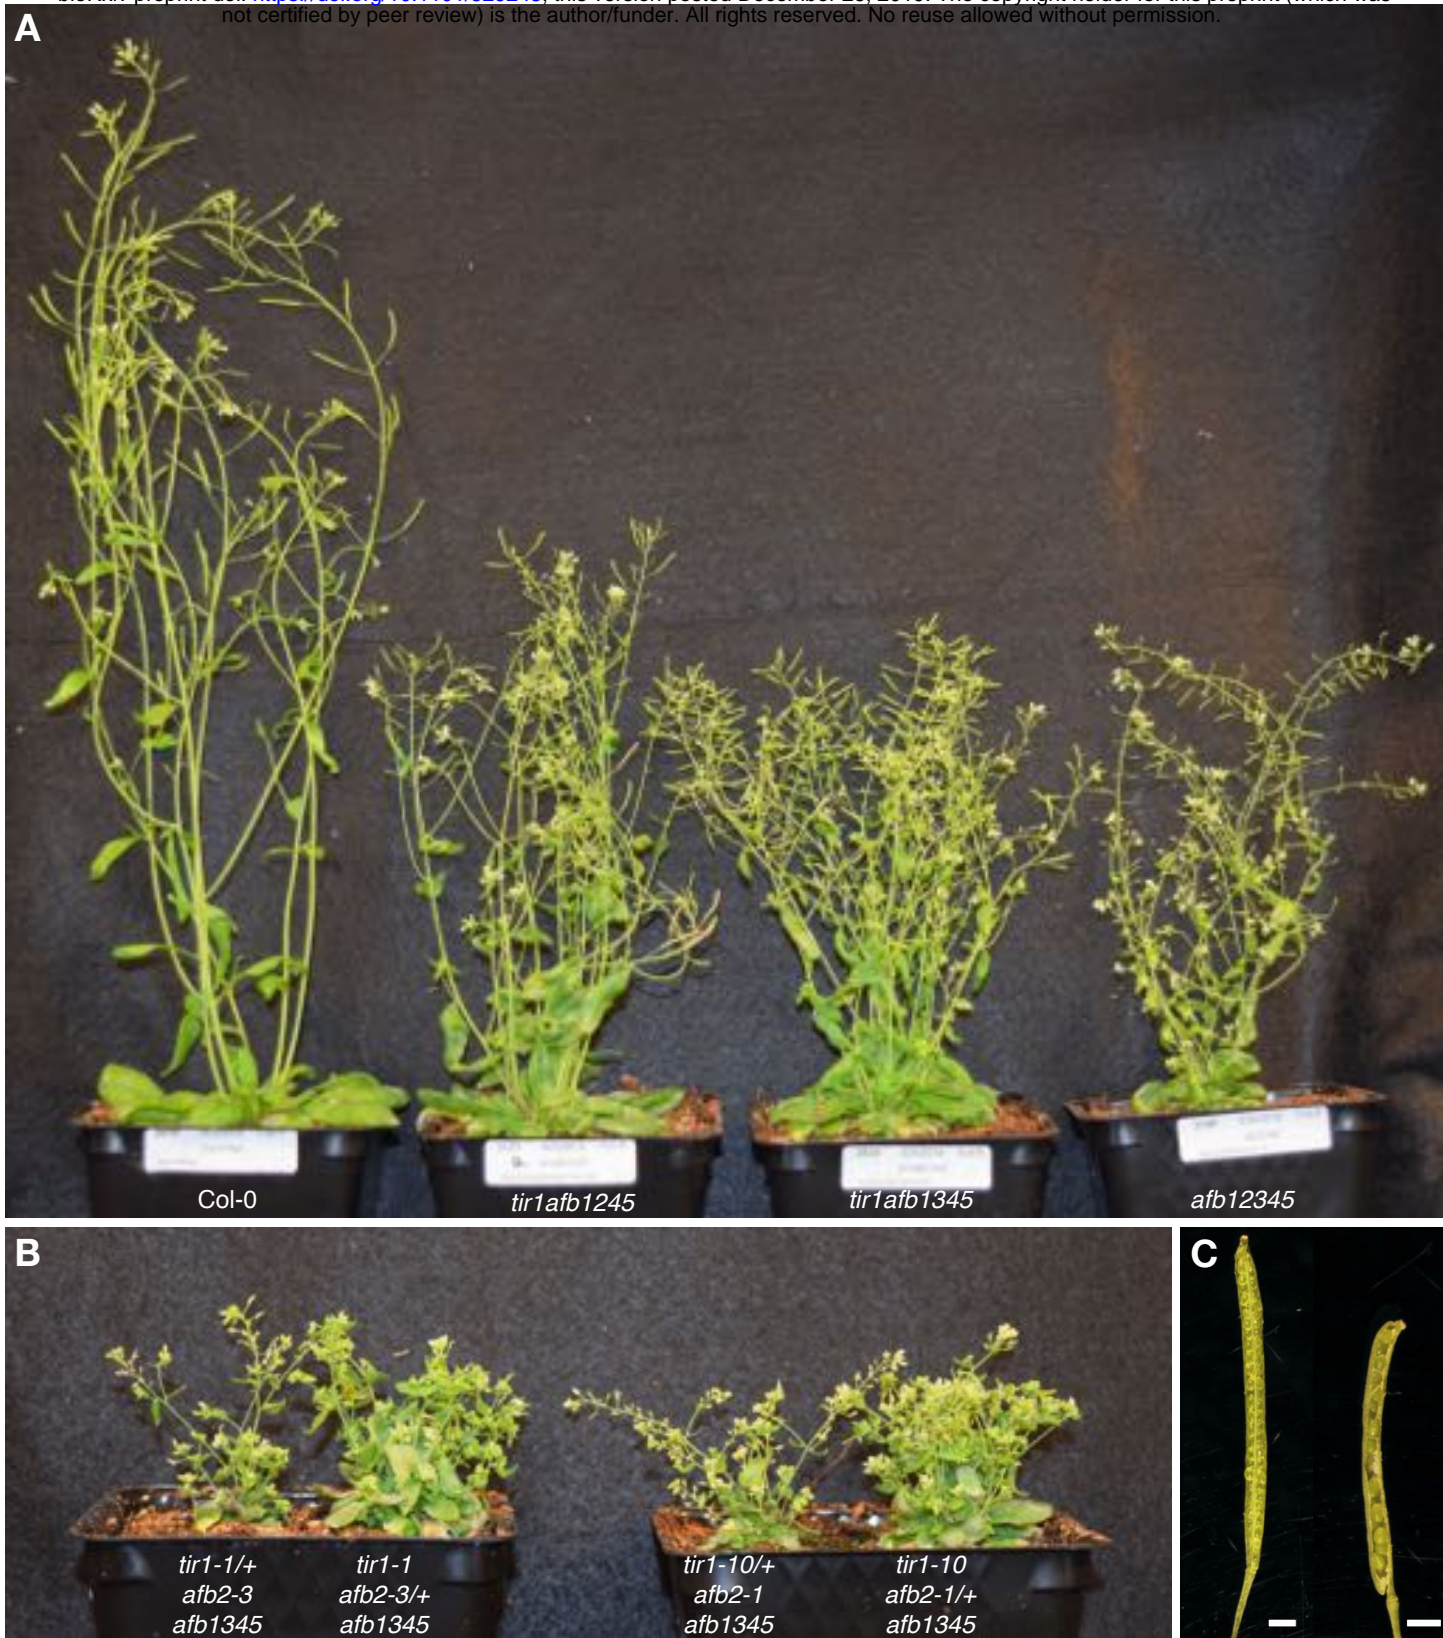

**Figure 1.** *tir1/afb* mutant lines exhibit a range of shoot phenotypes. **(A)** The viable quintuple mutants, *tir1afb1245*, *tir1afb1345*, and *afb12345*, are each approximately half the height of Col-0 WT, but differ in other phenotypes. Note the curved silique tips of the *tir1afb1245* mutant (indicative of gynoeceium defects) and the short siliques (due to poor fertility) of the *afb12345* mutant. **(B)** Lines with only one *TIR1*+ or one *AFB2*+ allele display similar phenotypes regardless of the mutant *tir1* and *afb2* alleles: left to right, *tir1-1/+ afb2-3 afb1345*, *tir1-1 afb2-3/+ afb1345*, *tir1-10/+ afb2-1 afb1345*, and *tir1-10 afb2-1/+ afb1345*. **(C)** Normal siliques (Col-0, left) have two valves containing developing seeds while 32% of *tir1afb1245* siliques have only one. The adaxial half of the valve walls were removed to reveal the developing seeds. Scale bars are 1 mm. Plants were grown for 42 days at 22°C and 16h daylength.

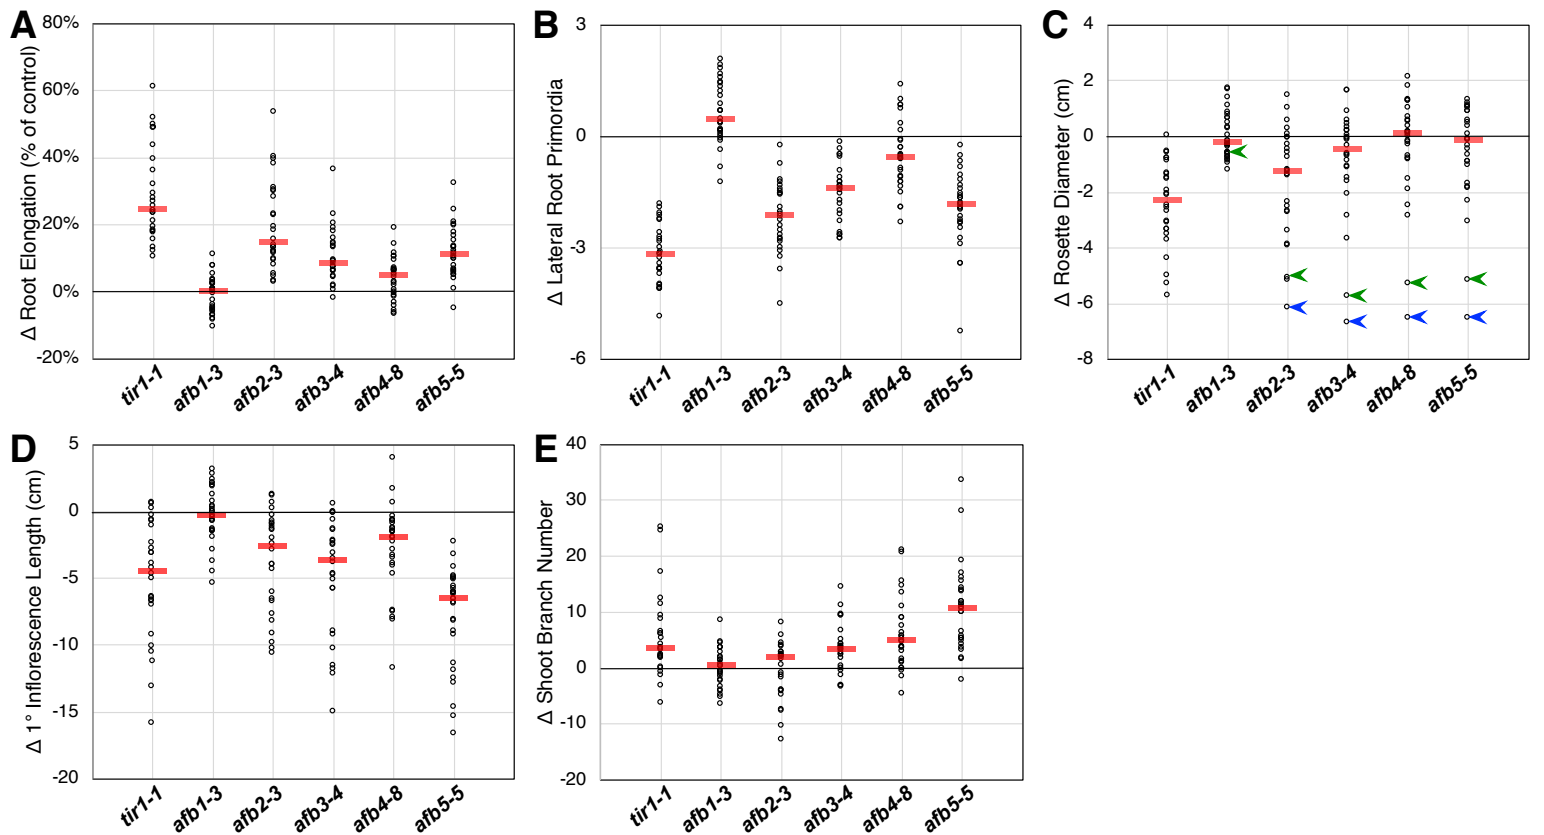

**Figure 2.** Relative *TIR1/AFB* gene effects. For each of the five phenotype measurements (Figure 1—figure supplement 4), the normalized mean for each genotype with the given mutation was subtracted from the normalized mean for the corresponding genotype lacking that mutation and plotted (circles). The red bars indicate the median difference attributable to the given mutation. **(A)** Effects of each mutation on IAA-inhibition of root elongation. For each genotype, twelve five-day-old seedlings were transferred and grown for three days on media containing 100 nM IAA, and their average growth was divided by that of twelve seedlings grown on media lacking added auxin. **(B)** Effects of each mutation on auxin-induced lateral root production. Twelve five-day-old seedlings for each genotype were grown for four days on media containing 100 nM IAA and the numbers of emerged lateral roots were counted. **(C)** Effects of each mutation on the average rosette diameters of five 42-day old plants. The blue arrowheads indicate difference in phenotypes between the *afb2345* quadruple mutant and the four triple mutants, and the green arrowheads indicate those for the *afb12345* quintuple mutant and the five quadruple mutants. **(D)** Effects of each mutation on the average height of the primary inflorescences for five 42-day old plants. **(E)** Effects of each mutation on the average number of inflorescence branches ( $\geq 1$  cm) on five 42-day old plants.



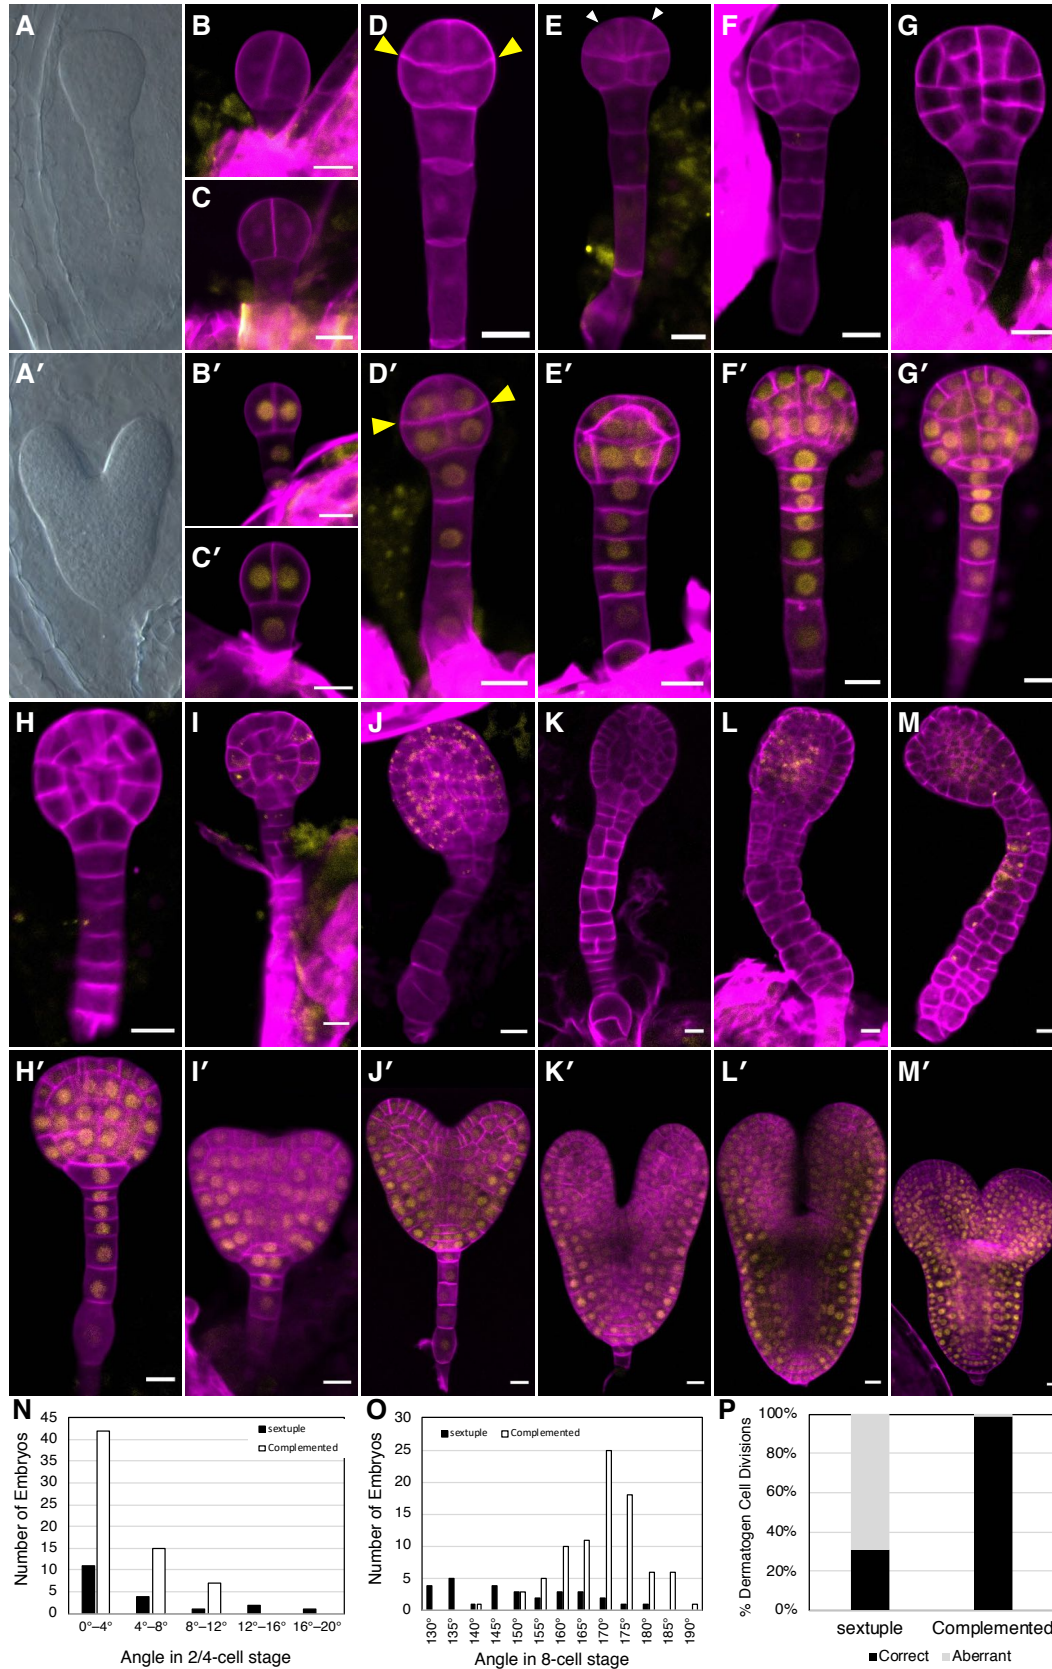

**Figure 3.** Embryo-lethal phenotypes of *tir1/afb* mutant lines. Rows of panels alternate between defective and normal embryos. Approximately one-quarter of the chloral-hydrate-cleared embryos from siliques of *afb2/+ tir1afb35* plants did not produce cotyledon primordia and have over-proliferated suspensors (A) while the remaining siblings from the same silique appear normal (A'). Embryos from *TIR1/AFB5/AFB2/+ tir1afb12345* plants were fixed, stained with SR2200 (cell walls, magenta), and scanned for fluorescence from the AFB2-mCitrine fusion protein (yellow). All were progeny of "d2" transgenic line and the standard alleles except panels C and D contained the *tir1-10* and *afb2-1* alleles and panels H' and I were progeny of plants with the "d1" transgenic line. The embryos in panels B–M are sextuple mutants lacking mCitrine signal while those in B'–M' are complemented siblings. The embryo stages are 2-cell (B–C, B'–C'), 8-cell (octant) (D, D'), 16-cell (dermatogen) (E, E'), early globular (F, F'), late globular (G–H, G'–H'), late transition (I, I'), heart (J, J'), torpedo (K–L, K'–L'), and bent cotyledon (M, M'). The yellow cytoplasmic signal in panels I through M likely represents autofluorescence of senescing cells. (N) Histogram of the angles of the first division plane with 0° defined as perpendicular to a line connecting the upper corners of the hypophysis cell for sextuple (black) and complemented siblings (white). The average difference was not significantly different ( $p = 0.32$  from  $t$  test,  $n=19$  and 64). (O) Histogram of the angles of lines connecting the upper and lower tiers of octant embryos from side to center to side (indicated by arrowheads in panels D, D'). The means for the sextuple and complemented siblings were 149.1° and 169.1°, respectively, and were significantly different ( $p=1.4 \times 10^{-7}$  from  $t$  test,  $n=29$  and 84). (P) Bar graph showing the frequencies of normal (periclinal) and aberrant (anticlinal, arrowheads in panel E) divisions in 16-cell embryos. While aberrant divisions were observed in complemented siblings, they were significantly more frequent in sextuple mutants ( $p=2.8 \times 10^{-54}$  from Fisher's exact test,  $n= 94$  and 437 divisions).

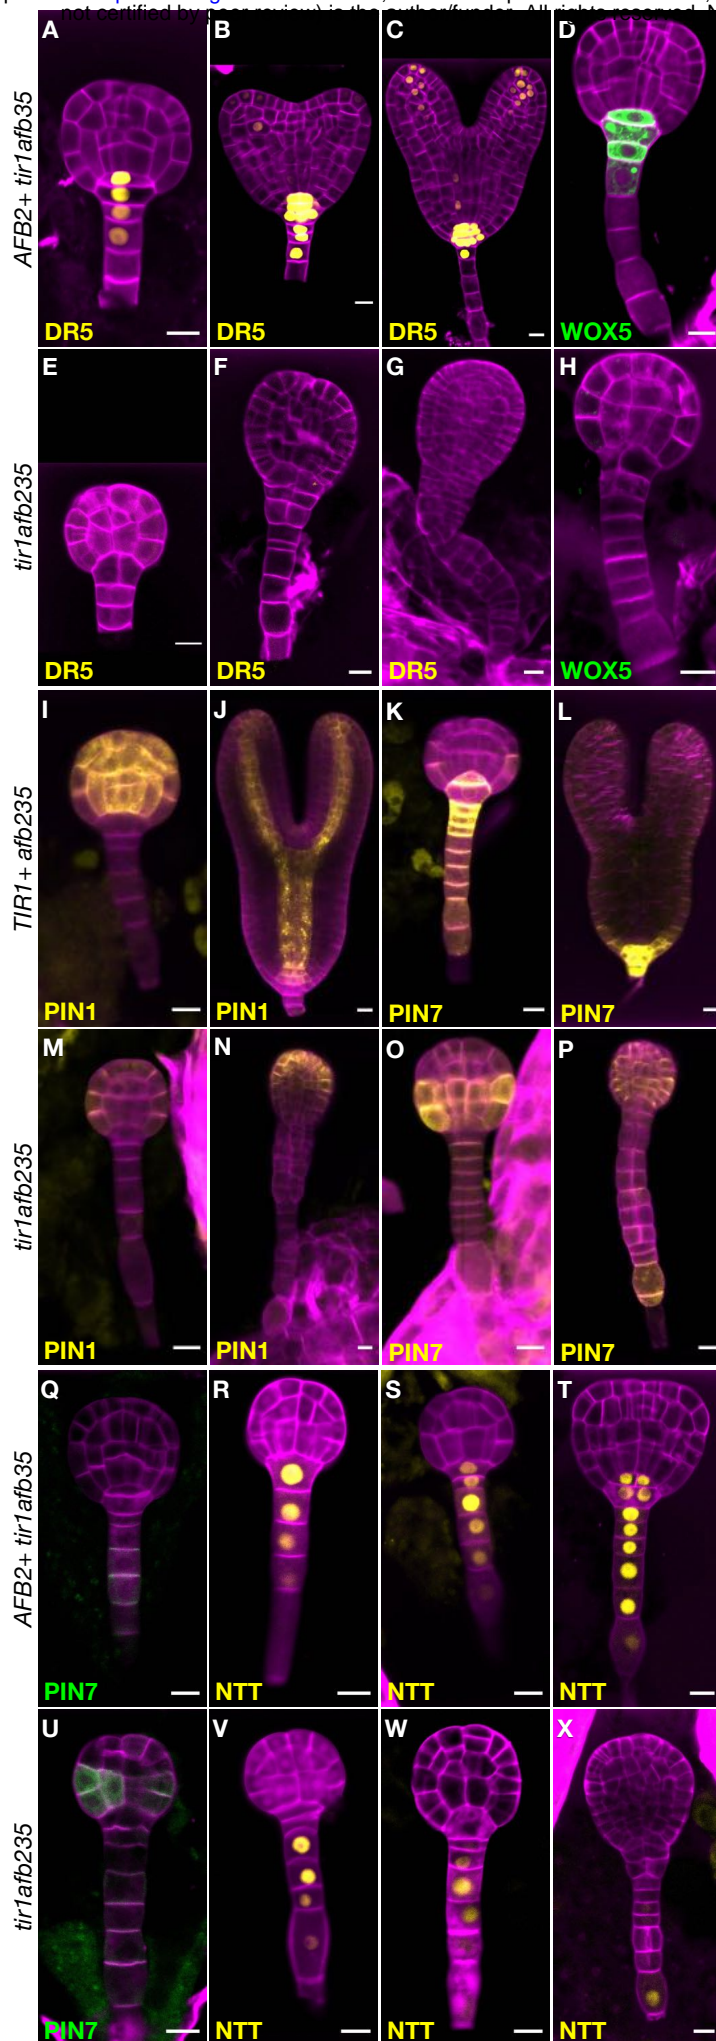

**Figure 4.** Marker gene expression in the *tir1afb235* embryos. Fluorescence in embryos from both *afb2/+ tir1afb35 DR5rev: 3xVenus-N7* (A–C, E–G) and *afb2/+ tir1afb35 WOX5:GFP<sub>ER</sub>* (D, H) markers was present in phenotypically normal siblings (A–D) but absent in abnormal (presumed *tir1afb235*) embryos (E–H). Fluorescence in embryos from *tir1/+afb235 PIN1-Venus* plants: normal-phenotype globular embryo (I), normal-phenotype torpedo-stage embryo (J), mutant-phenotype globular embryo (M) and later-stage embryo (N). Progeny of *tir1/+ afb235 PIN7-Venus* or *afb2/+ tir1afb35 PIN7-GFP* plants: phenotypically normal globular embryos (K, Q) mutant globular embryos (O, U), and normal (L) and mutant (P) torpedo-stage embryos. Progeny of *afb2/+ tir1afb35 NTT-YPet* plants: normal-phenotype globular- (R–S) and transition- (T) stage embryos, and mutant embryos (V–X). Scale bars: 10 μm.



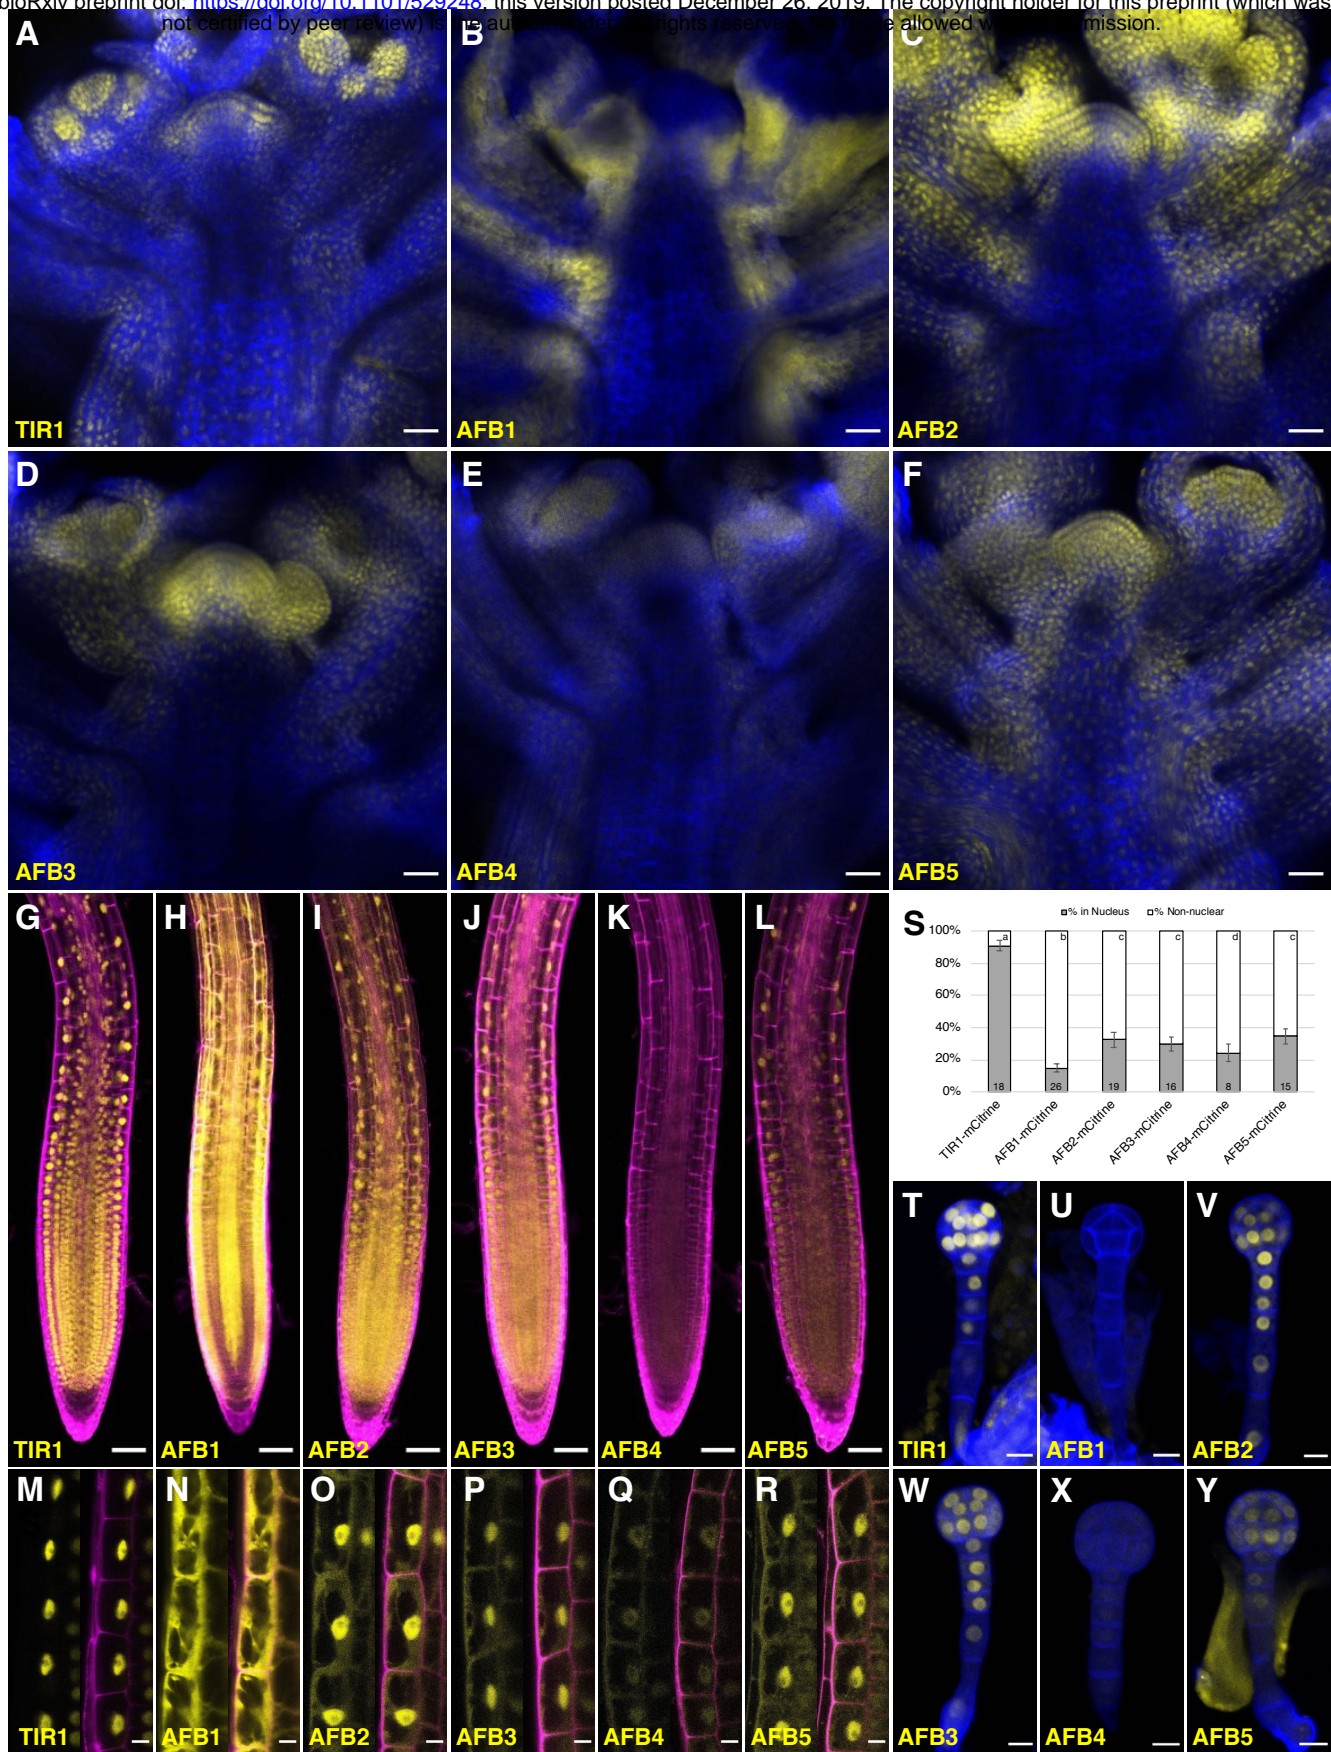

**Figure 5.** Expression of *TIR1/AFB-mCitrine* translational fusions. (A–F) Confocal images of inflorescence apices from 4-week-old plants containing the specified *TIR1/AFB-mCitrine* transgenes. (G–R) Confocal images of roots of 5-day-old seedlings under lower magnification (G–L) or 7-day-old seedlings under higher magnification (M–R). Images in panels G and I–L used similar microscope settings while those in panel H used less sensitive settings. (S) Plot comparing the relative proportions of mCitrine signal inside the nucleus (gray) and outside the nucleus (white). Cells were imaged and measured for each *TIR1/AFB-mCitrine* line, and the averages  $\pm$  standard deviations are shown. For *AFB1-mCitrine*, F1 hybrids with the *UBQ10:H2B-mTurquoise2* nuclear marker were used so that the nuclei could be delineated (Figure 5—figure supplement 3). The numbers in the bars indicate the number of cells measured and the letters distinguish significantly different averages (two-tailed *t*-test  $p < 0.05$ ). (T–Y) Confocal images of dermatogen or early globular embryos. mCitrine signal is shown as yellow in all panels, and cell walls were stained with Calcofluor White M2R (blue; A–F), propidium iodide (magenta; G–R), and SCRI Renaissance 2200 (blue; T–Y). In panels M–R, mCitrine fluorescence is shown with and without merging with the propidium iodide stain image. Transgenic lines and genetic backgrounds used: (A, G, M, S, T) *tir1-10 TIR1-mCitrine#2*; (B, H, N, S, U) *afb1-3 AFB1-mCitrine#7*; (C, O, V) *afb2-3 AFB2-mCitrine#3*; (I, S) *afb2-3 AFB2-mCitrine#5*; (D, J, P, S, W) *afb3-4 AFB3-mCitrine#1*; (E, K, Q, S, X) *afb4-8 AFB4-mCitrine#3*; (F, L, Y) *afb5-5 AFB5-mCitrine#19* and (R, S) *afb5-5 AFB5-mCitrine#23*. Scale bars equal 25  $\mu$ m (A–F), 50  $\mu$ m (G–L), and 10  $\mu$ m (M–R, T–Y).

(A)

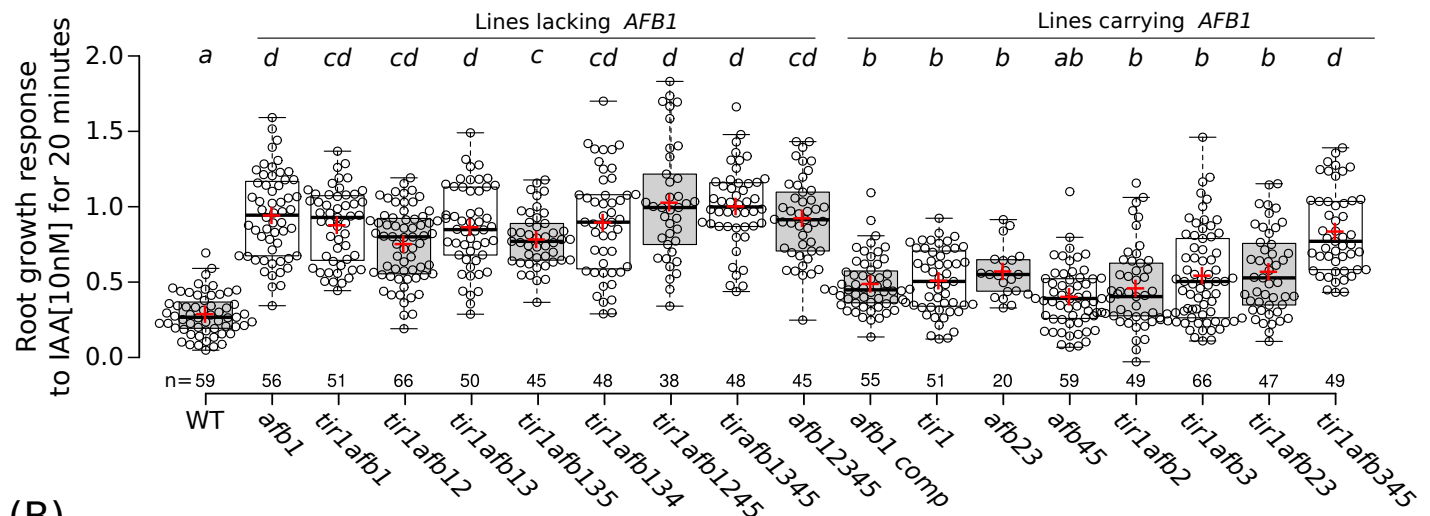

(B)

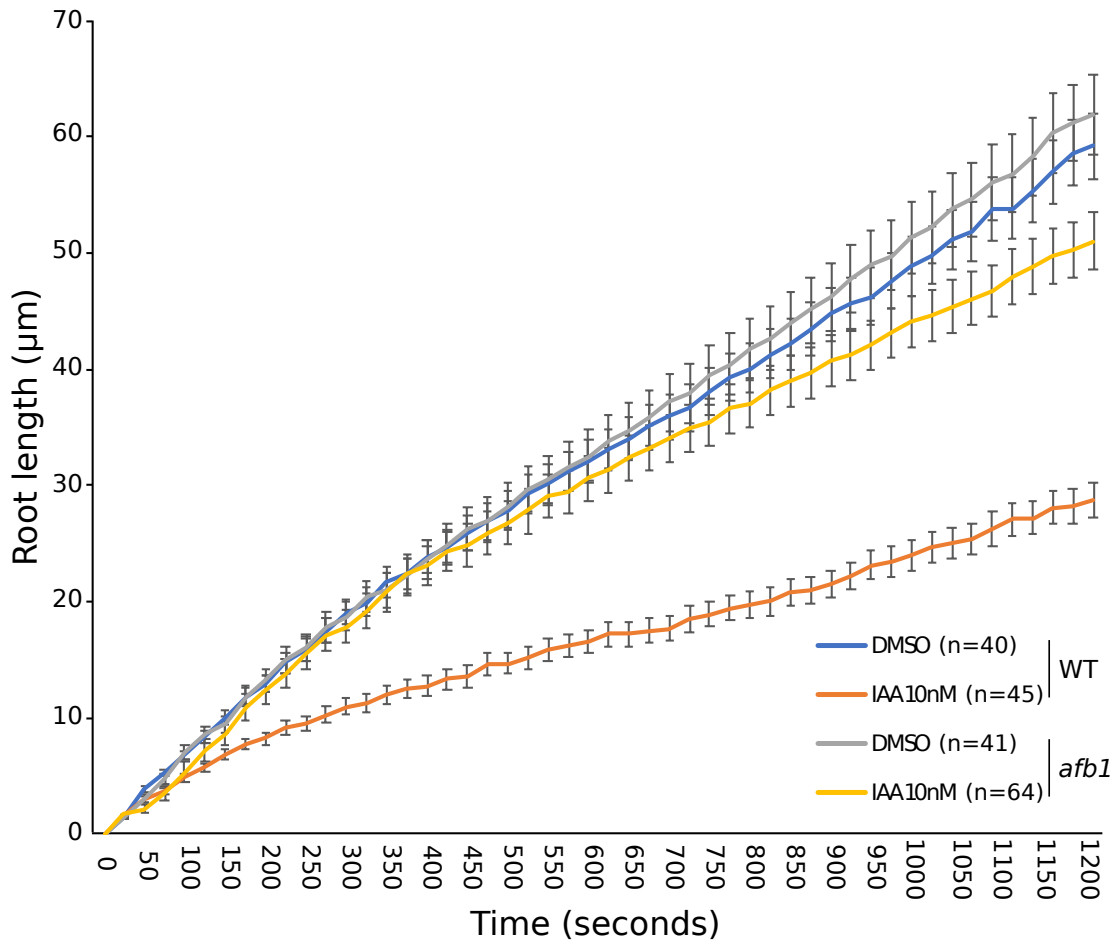

**Figure 6.** The role of *AFB1* in rapid inhibition of root elongation. **(A)** Plot of the root growth response of different genotypes to 10 nM IAA for 20 minutes. Black circles represent the response for one single root. Red crosses indicate the mean. Black bars indicate median. n indicates the number of roots obtained from three independent experiments. Letters indicate statistical differences according to one-way ANOVA coupled with post hoc Tukey honestly significant difference (HSD) test ( $p = 0.05$ ). **(B)** Graph of the root length in  $\mu\text{m}$  according to time in seconds of WT and *afb1* in DMSO and 10 nM IAA treatments (blue, gray, orange and yellow lines, respectively). Bars indicates standard deviation of the mean (SEM). n indicates the number of roots obtained from three independent experiments.

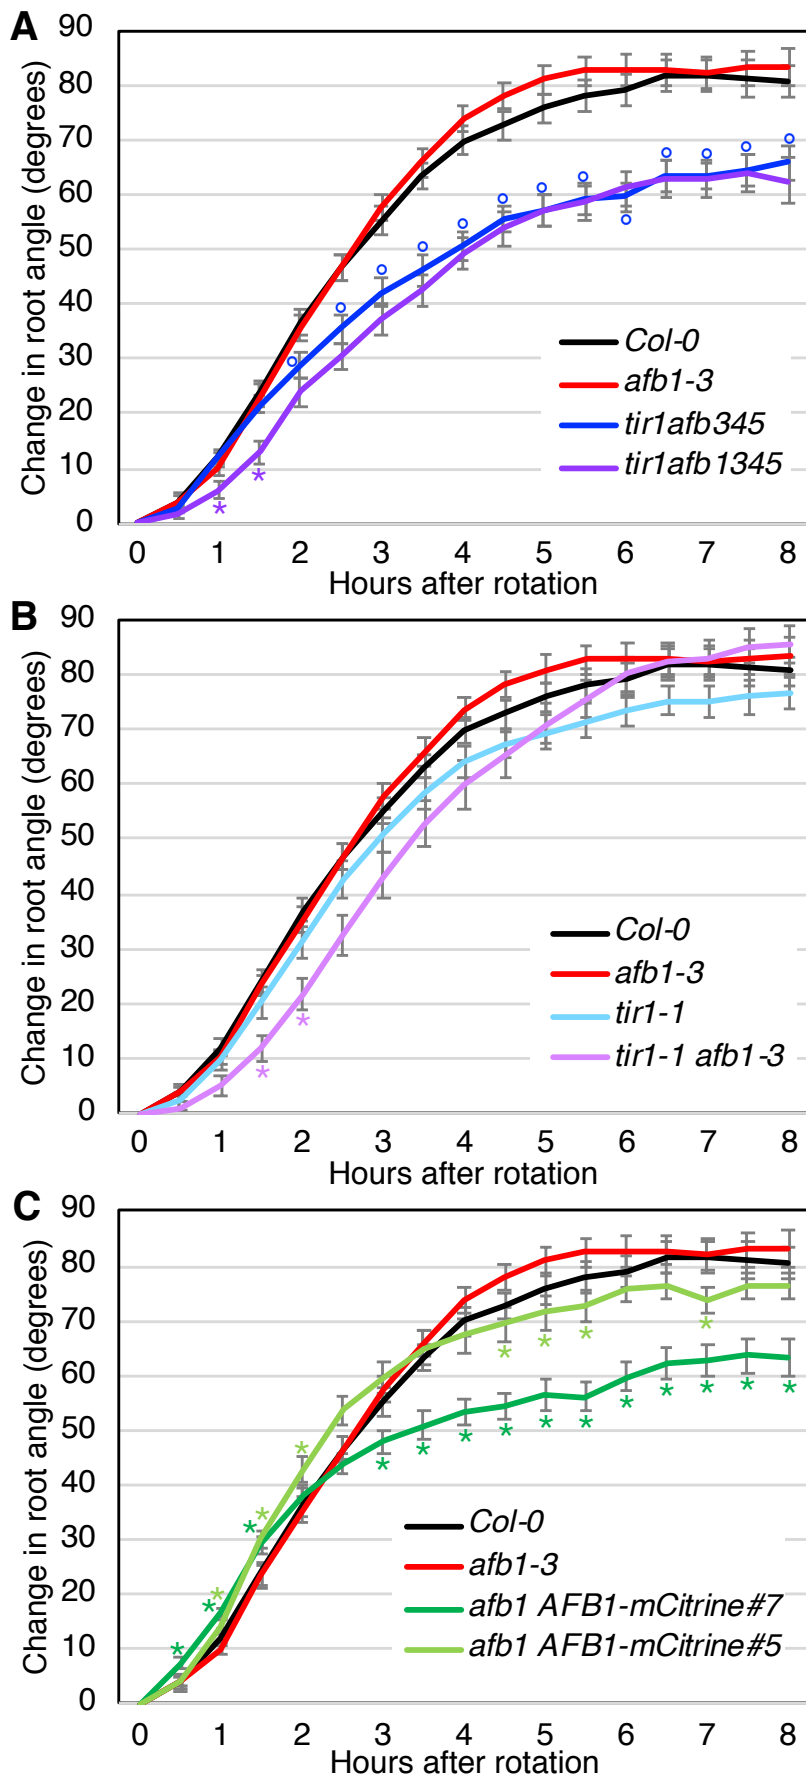

**Figure 7.** Gravitropic response of *tir1/afb* lines. Sixteen seedlings for each line were imaged every 30 minutes after rotating the plates 90° and the mean difference in the root-tip angle from the original angle  $\pm$  SEM are plotted versus time. *Col-0* and *afb1-3* are included in all panels for comparison. Time points at which lines differed from *Col-0* are indicated by degree symbols (°) and differences between lines with and without the *afb1* mutation or an *AFB1-mCitrine* transgene are indicated by asterisks (\*) of the colors shown in the legend (*t*-test,  $p < 0.05$ ). Colors: black, *Col-0*; red, *afb1-3*; blue, *tir1afb345*; purple, *tir1afb1345*; cyan, *tir1-1*; lavender, *tir1-1 afb1-3*; light green, *afb1-3 AFB1-mCitrine#5*; and dark green, *afb1-3 AFB1-mCitrine#7*.



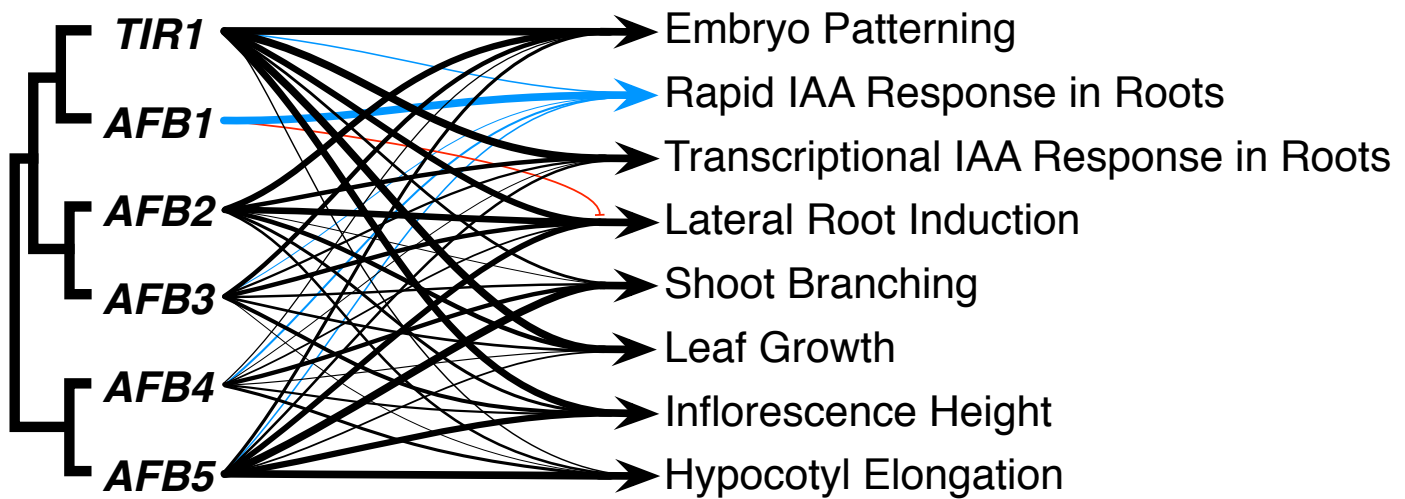

**Figure 8. (Graphical Abstract)** Summary of each *TIR1/AFB* gene's contributions to different responses. The line weights reflect the relative importance for each gene's roles. The blue lines represent contributions to the rapid IAA-mediated inhibition of root elongation and the red line with the bar end indicates the antagonistic role observed for *AFB1* in lateral root production.

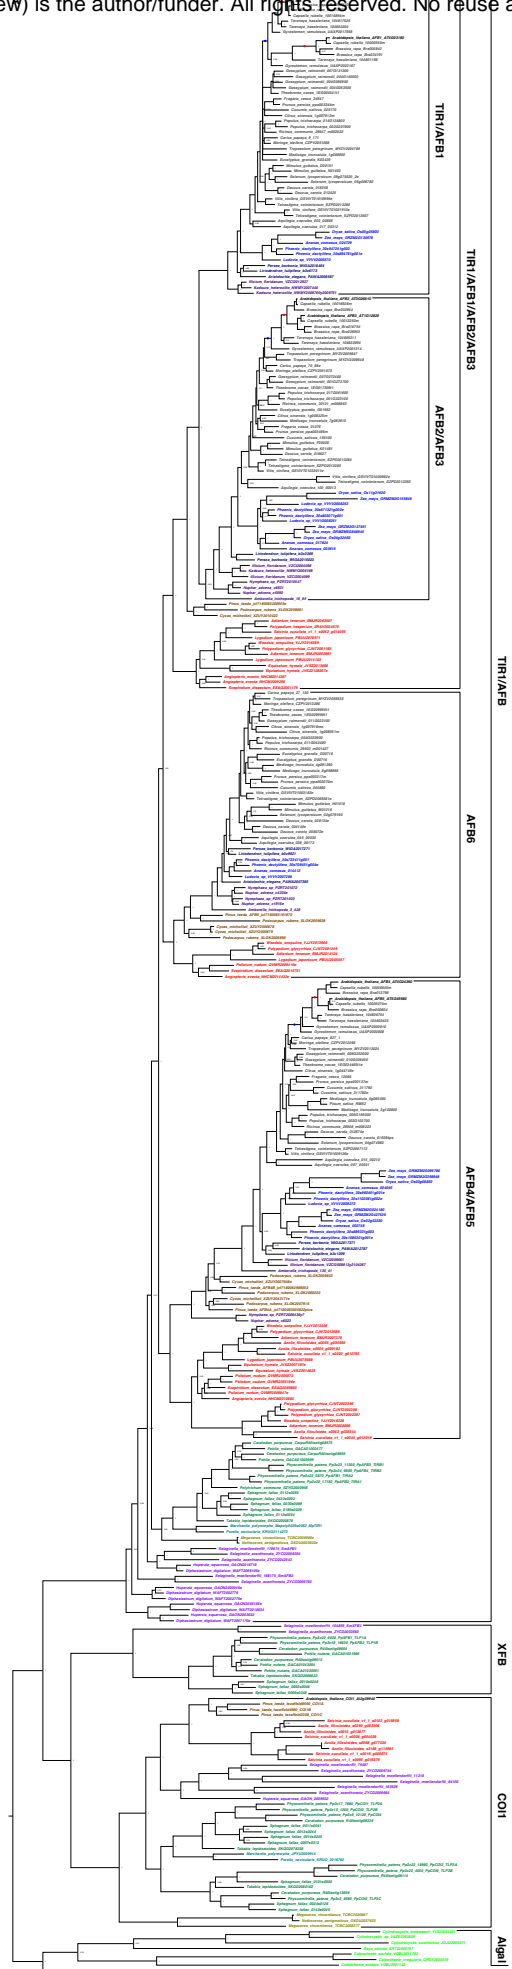

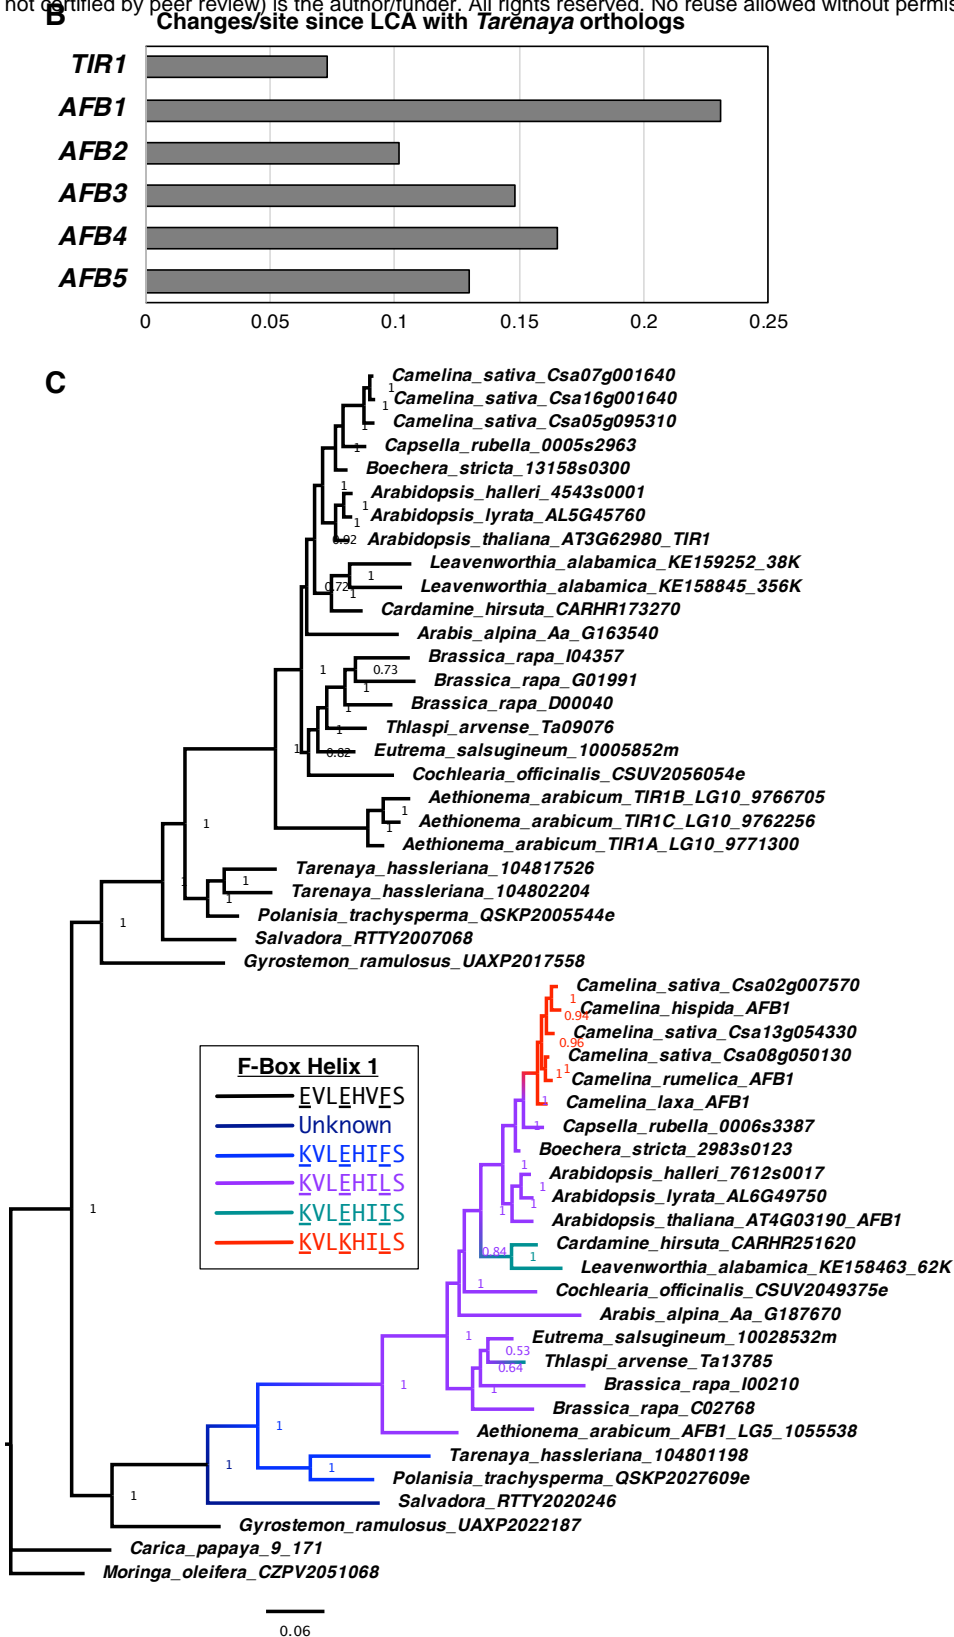

**Figure 1—figure supplement 1.** TIR1/AFB Phylogeny. (A) The MrBayes-inferred gene tree illustrates the relationships between three F-Box-LRR protein families in land plants. The sources of the sequences are indicated by tip label colors: *Arabidopsis thaliana*, black; other eudicots, gray; monocots, light blue; magnoliids, dark blue; ANITA grade angiosperms, dark purple; gymnosperms, brown; ferns, red; lycophytes, light purple; mosses, dark green; liverworts, teal; hornworts, tan; and algae, light green. The branches leading to the At- $\alpha$  and At- $\beta$  WGDs are indicated by red and blue dots, respectively. Three clades of TIR1/AFB proteins have well-supported fern sister clades indicating that first gene duplications in the family predated euphyllophyte radiation. Note that the position of the lycophyte TIR1/AFBs relative to those of bryophytes and seed plants was not resolved. (B) The graph shows the sum of branch lengths (amino-acid substitutions per site) from the node joining the Cleomaceae and Brassicaceae clades to the tip for the *Arabidopsis* member of the clade. (C) Gene tree for the TIR1 and AFB1 clades with the parsimoniously inferred relative dates for the appearance of the three substitutions in the first helix of the F-Box that were shown to interfere with SCF assembly. The *Salvadora AFB1* transcript assembly lacked the sequence encoding this helix so that ancestor's sequence could not be predicted.

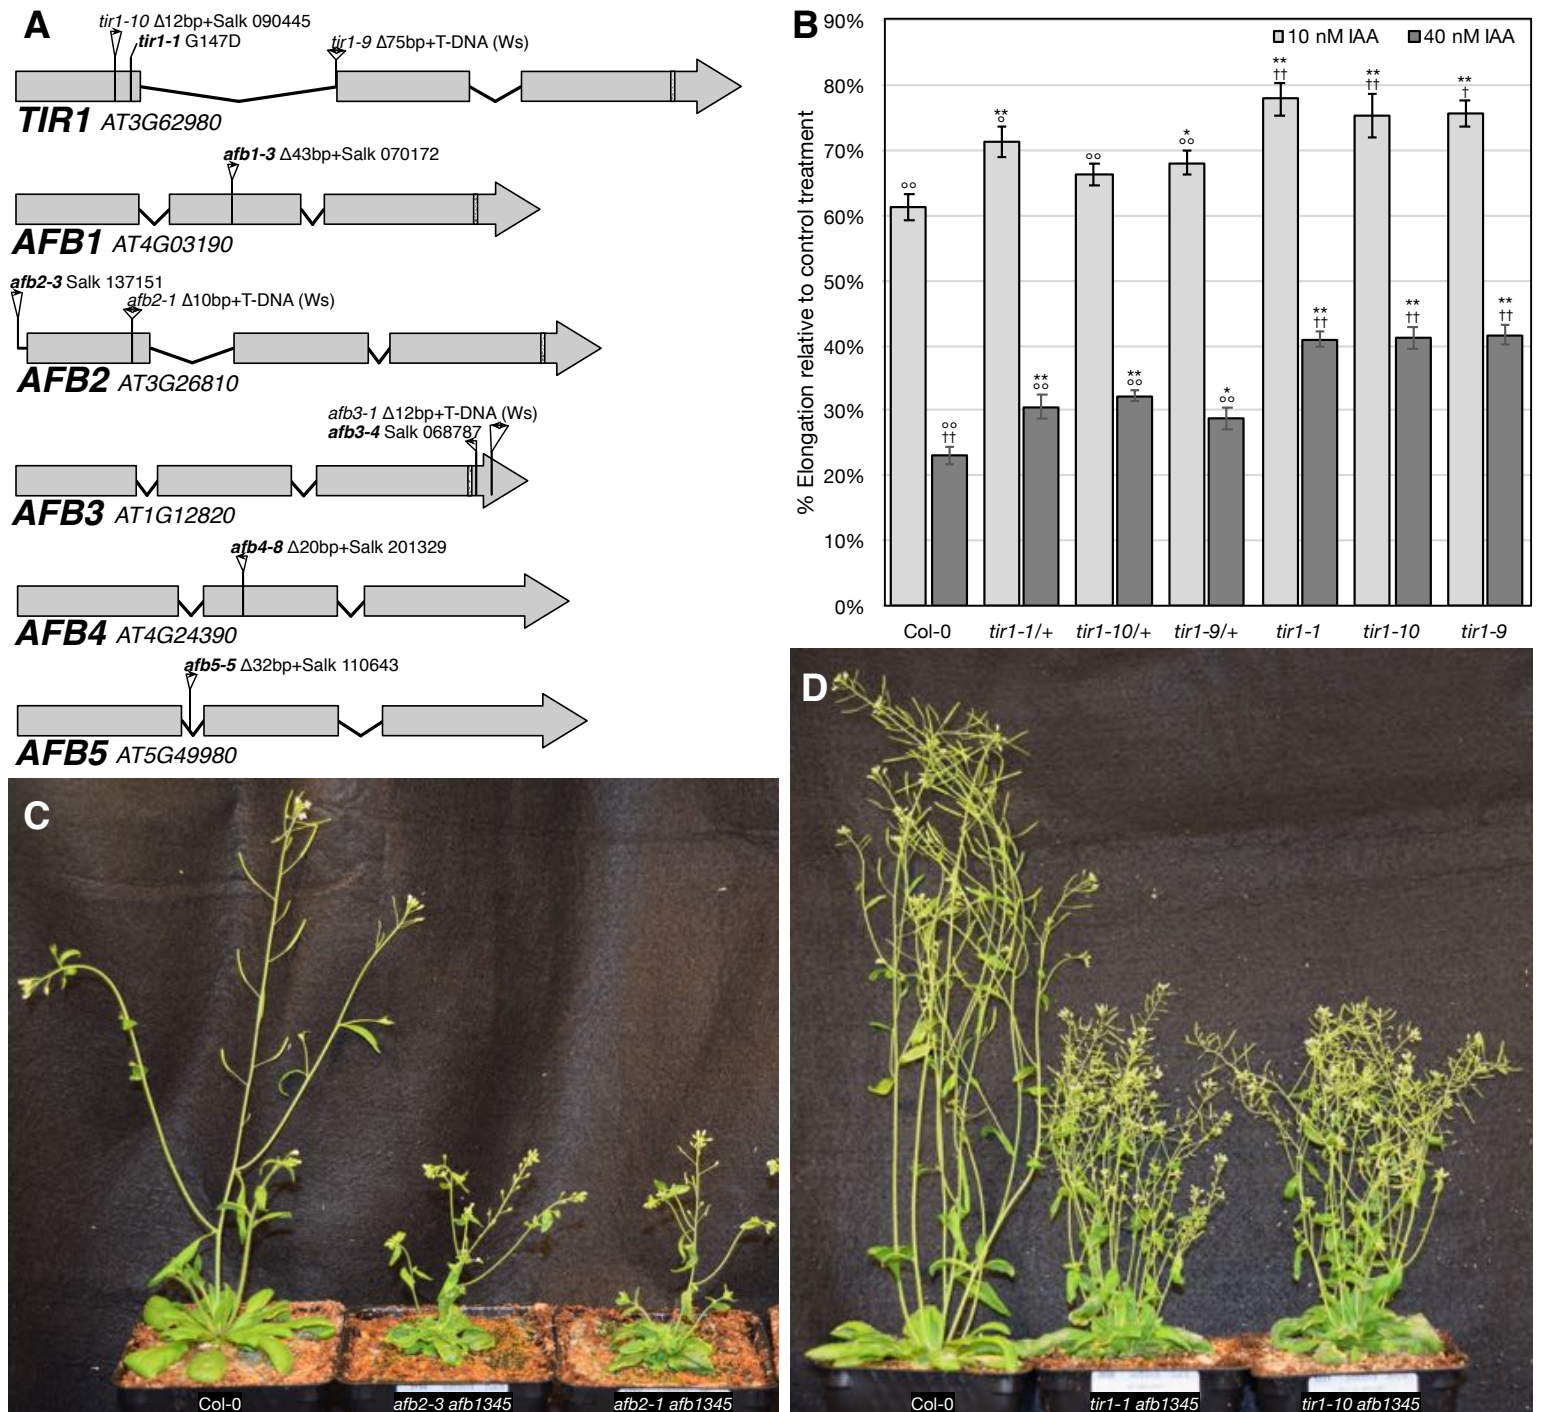

**Figure 1—figure supplement 2.** Alternate *tir1/afb* alleles. **A**, Diagram of exon/intron structure showing the locations of each mutation used in this study. T-DNA insertions are shown as triangles with the arrowheads indicating the locations of left-border sequences. The box in the third exons indicates the regions targeted by miR393. **B**, Root elongation inhibition assay of seedlings homozygous or heterozygous ( $F_1$  progeny of Col-0 crosses) for three *tir1* alleles. Sample sizes were 20-31 per treatment. Two-tailed *t*-test *p* values: \*,  $\leq 0.05$  and \*\*,  $\leq 0.005$  compared to Col-0; °,  $\leq 0.05$  and °°,  $\leq 0.005$  compared to *tir1-10/+*; and †,  $\leq 0.05$ ; ††,  $\leq 0.005$  compared to *tir1-10/+*. The *tir1-9* allele (Ws-2 background) was backcrossed twice to Col-0 and an additional time for *tir1-9/+*. **C**, 32-day old Col-0, *afb2-3 afb1345*, and *afb2-1 afb1345* plants. **D**, 42-day old Col-0, *tir1-1 afb1345*, and *tir1-10 afb1345* plants.

Figure 1-figure supplement 3

| Genotype                                                 | Background     | Early Embryo Defects | % Rootless Embryos | % Siliques Missing Valves | Rosette | Short Inflorescence | Shoot Branching | Root Elongation on IAA | Lateral Root Production on IAA |
|----------------------------------------------------------|----------------|----------------------|--------------------|---------------------------|---------|---------------------|-----------------|------------------------|--------------------------------|
| Col-0                                                    | Col-0          | -                    | 0%                 | 0%                        | -       | -                   | -               | -                      | -                              |
| <i>tir1-1</i>                                            | Col-0          | -                    | -                  | ND                        | +       | -                   | -               | +                      | ++                             |
| <b><i>tir1-10</i></b>                                    | Col-0          | -                    | -                  | ND                        | +       | -                   | -               | +                      | ++                             |
| <i>afb1-3</i>                                            | Col-0          | -                    | -                  | ND                        | -       | -                   | -               | -                      | -                              |
| <i>afb2-3</i>                                            | Col-0          | -                    | -                  | ND                        | -       | -                   | -               | -                      | +                              |
| <i>afb3-4</i>                                            | Col-0          | -                    | -                  | ND                        | -       | -                   | -               | -                      | -                              |
| <i>afb4-8</i>                                            | Col-0          | -                    | -                  | ND                        | -       | -                   | -               | -                      | -                              |
| <i>afb5-5</i>                                            | Col-0          | -                    | -                  | ND                        | -       | +                   | -               | -                      | -                              |
| <i>tir1-1 afb1-3</i>                                     | Col-0          | -                    | -                  | ND                        | +       | -                   | -               | +                      | +                              |
| <i>tir1-1 afb2-3</i>                                     | Col-0          | -                    | 0%                 | ND                        | ++      | +                   | -               | ++                     | +++                            |
| <i>tir1-1 afb2-1</i>                                     | Col/Ws (4xCol) | -                    | ND                 | ND                        | +       | +                   | -               | +                      | +++                            |
| <i>tir1-1 afb3-4</i>                                     | Col-0          | -                    | 0%                 | ND                        | ++      | +                   | -               | ++                     | +++                            |
| <b><i>tir1-1 afb3-1</i></b>                              | Col/Ws (4xCol) | -                    | ND                 | ND                        | +       | +                   | -               | +                      | +++                            |
| <i>tir1-1 afb4-8</i>                                     | Col-0          | -                    | -                  | ND                        | -       | -                   | -               | +                      | ++                             |
| <i>tir1-1 afb5-5</i>                                     | Col-0          | -                    | -                  | ND                        | +       | ++                  | +               | ++                     | ++                             |
| <i>afb1-3 afb2-3</i>                                     | Col-0          | -                    | -                  | ND                        | -       | -                   | -               | -                      | +                              |
| <i>afb1-3 afb3-4</i>                                     | Col-0          | -                    | -                  | ND                        | -       | -                   | -               | -                      | +                              |
| <i>afb1-3 afb4-8</i>                                     | Col-0          | -                    | -                  | ND                        | -       | +                   | -               | -                      | -                              |
| <i>afb1-3 afb5-5</i>                                     | Col-0          | -                    | -                  | ND                        | -       | +                   | -               | -                      | +                              |
| <i>afb2-3 afb3-4</i>                                     | Col-0          | -                    | -                  | ND                        | -       | +                   | -               | +                      | +++                            |
| <b><i>afb2-1 afb3-1</i></b>                              | Col/Ws (4xCol) | -                    | -                  | ND                        | -       | +                   | -               | +                      | +                              |
| <i>afb2-3 afb4-8</i>                                     | Col-0          | -                    | -                  | ND                        | -       | +                   | -               | +                      | +                              |
| <i>afb2-3 afb5-5</i>                                     | Col-0          | -                    | -                  | ND                        | -       | +                   | -               | +                      | ++                             |
| <i>afb3-4 afb4-8</i>                                     | Col-0          | -                    | -                  | ND                        | -       | +                   | -               | -                      | +                              |
| <i>afb3-4 afb5-5</i>                                     | Col-0          | -                    | -                  | ND                        | -       | +                   | -               | +                      | ++                             |
| <i>afb4-8 afb5-5</i>                                     | Col-0          | -                    | -                  | ND                        | -       | ++                  | +               | +                      | ++                             |
| <i>tir1-1 afb1-3 afb2-3</i>                              | Col-0          | -                    | -                  | ND                        | +++     | ++                  | -               | +++                    | +++                            |
| <i>tir1-1 afb1-3 afb3-4</i>                              | Col-0          | -                    | -                  | ND                        | ++      | +                   | -               | ++                     | ++                             |
| <i>tir1-1 afb1-3 afb4-8</i>                              | Col-0          | -                    | -                  | ND                        | +       | +                   | -               | +                      | ++                             |
| <i>tir1-1 afb1-3 afb5-5</i>                              | Col-0          | -                    | -                  | ND                        | +       | ++                  | -               | +                      | ++                             |
| <i>tir1-1 afb2-3 afb3-4</i>                              | Col-0          | -                    | 54%                | 53%                       | +++     | ++++                | -               | ++++                   | ++++                           |
| <b><i>tir1-1 afb2-1 afb3-1</i></b>                       | Col/Ws (4xCol) | -                    | 52%                | ND                        | +++     | ++++                | -               | ++++                   | ++++                           |
| <i>tir1-1 afb2-3 afb4-8</i>                              | Col-0          | -                    | 1%                 | ND                        | ++      | +                   | -               | ++                     | ++++                           |
| <i>tir1-1 afb2-3 afb5-5</i>                              | Col-0          | -                    | 25%                | ND                        | +++     | +++                 | -               | ++++                   | ++++                           |
| <i>tir1-1 afb3-4 afb4-8</i>                              | Col-0          | -                    | -                  | ND                        | ++      | ++                  | -               | +                      | +++                            |
| <i>tir1-1 afb3-4 afb5-5</i>                              | Col-0          | -                    | -                  | ND                        | +       | +++                 | ++              | ++                     | +++                            |
| <i>tir1-1 afb4-8 afb5-5</i>                              | Col-0          | -                    | -                  | ND                        | +       | ++                  | +++             | ++                     | +++                            |
| <i>afb1-3 afb2-3 afb3-4</i>                              | Col-0          | -                    | -                  | ND                        | -       | -                   | -               | +                      | ++                             |
| <i>afb1-3 afb2-3 afb4-8</i>                              | Col-0          | -                    | -                  | ND                        | -       | +                   | -               | -                      | -                              |
| <i>afb1-3 afb2-3 afb5-5</i>                              | Col-0          | -                    | -                  | ND                        | -       | +                   | -               | +                      | +                              |
| <i>afb1-3 afb3-4 afb4-8</i>                              | Col-0          | -                    | -                  | ND                        | -       | +                   | -               | -                      | -                              |
| <i>afb1-3 afb3-4 afb5-5</i>                              | Col-0          | -                    | -                  | ND                        | -       | +                   | -               | +                      | +                              |
| <i>afb1-3 afb4-8 afb5-5</i>                              | Col-0          | -                    | -                  | ND                        | -       | +                   | +               | +                      | +                              |
| <i>afb2-3 afb3-4 afb4-8</i>                              | Col-0          | -                    | -                  | ND                        | -       | +                   | -               | ++                     | ++                             |
| <i>afb2-3 afb3-4 afb5-5</i>                              | Col-0          | -                    | -                  | ND                        | -       | ++                  | -               | ++                     | +++                            |
| <i>afb2-3 afb4-8 afb5-5</i>                              | Col-0          | -                    | -                  | ND                        | -       | ++                  | +               | +                      | +++                            |
| <i>afb3-4 afb4-8 afb5-5</i>                              | Col-0          | -                    | -                  | ND                        | -       | ++                  | +               | +                      | +++                            |
| <i>tir1-1 afb1-3 afb2-3 afb3-4</i>                       | Col-0          | -                    | 67%                | ND                        | ++++    | ++++                | -               | ++++                   | ++++                           |
| <i>tir1-1 afb1-3 afb2-3 afb4-8</i>                       | Col-0          | -                    | ND                 | 0%                        | ++      | +                   | -               | +++                    | +++                            |
| <i>tir1-1 afb1-3 afb2-3 afb5-5</i>                       | Col-0          | -                    | ND                 | 35%                       | ++      | ++                  | +               | +++                    | ++++                           |
| <i>tir1-1 afb1-3 afb3-4 afb4-8</i>                       | Col-0          | -                    | -                  | 2%                        | +       | +                   | +               | +                      | ++                             |
| <i>tir1-1 afb1-3 afb3-4 afb5-5</i>                       | Col-0          | -                    | -                  | 0%                        | +       | +++                 | ++              | +++                    | ++++                           |
| <i>tir1-1 afb1-3 afb4-8 afb5-5</i>                       | Col-0          | -                    | -                  | ND                        | -       | ++                  | ++              | ++                     | +++                            |
| <i>tir1-1 afb2-3 afb3-4 afb4-8</i>                       | Col-0          | -                    | 98% (22°C)         | ND                        | ND      | ND                  | ND              | ND                     | ND                             |
| <i>tir1-1 afb2-3 afb3-4 afb5-5</i>                       | Col-0          | embryo lethal        | NA                 | NA                        | NA      | NA                  | NA              | NA                     | NA                             |
| <b><i>tir1-10 afb2-1 afb3-1 afb5-5</i></b>               | Col/Ws (8xCol) | embryo lethal        | NA                 | NA                        | NA      | NA                  | NA              | NA                     | NA                             |
| <i>tir1-1 afb2-3 afb4-8 afb5-5</i>                       | Col-0          | -                    | 37%                | 78%                       | ++++    | ++++                | +               | ++++                   | ++++                           |
| <i>tir1-1 afb3-4 afb4-8 afb5-5</i>                       | Col-0          | -                    | -                  | 3%                        | +++     | ++++                | ++++            | ++                     | ++++                           |
| <i>afb1-3 afb2-3 afb3-4 afb4-8</i>                       | Col-0          | -                    | -                  | ND                        | -       | +                   | -               | +                      | +                              |
| <i>afb1-3 afb2-3 afb3-4 afb5-5</i>                       | Col-0          | -                    | -                  | ND                        | -       | ++                  | -               | ++                     | +++                            |
| <i>afb1-3 afb2-3 afb4-8 afb5-5</i>                       | Col-0          | -                    | -                  | ND                        | -       | ++                  | +               | +                      | +++                            |
| <i>afb1-3 afb3-4 afb4-8 afb5-5</i>                       | Col-0          | -                    | -                  | ND                        | -       | ++                  | +               | +                      | +                              |
| <i>afb2-3 afb3-4 afb4-8 afb5-5</i>                       | Col-0          | -                    | -                  | ND                        | +++     | ++++                | ++              | +                      | ++++                           |
| <i>tir1-1 afb1-3 afb2-3 afb3-4 afb4-8</i>                | Col-0          | -                    | 99% (22°C)         | ND                        | ND      | ND                  | ND              | ND                     | ND                             |
| <i>tir1-1 afb1-3 afb2-3 afb3-4 afb5-5</i>                | Col-0          | embryo lethal        | NA                 | NA                        | NA      | NA                  | NA              | NA                     | NA                             |
| <b><i>tir1-10 afb1-3 afb2-1 afb3-1 afb5-5</i></b>        | Col/Ws (8xCol) | embryo lethal        | NA                 | NA                        | NA      | NA                  | NA              | NA                     | NA                             |
| <i>tir1-1 afb1-3 afb2-3 afb4-8 afb5-5</i>                | Col-0          | -                    | 43% (22°C)         | 32%                       | ++++    | ++++                | ++              | ++++                   | ++++                           |
| <i>tir1-1 afb1-3 afb3-4 afb4-8 afb5-5</i>                | Col-0          | -                    | -                  | 9%                        | +++     | ++++                | ++++            | ++                     | ++++                           |
| <b><i>tir1-10 afb1-3 afb3-4 afb4-8 afb5-5</i></b>        | Col/Ws (8xCol) | -                    | -                  | ND                        | ND      | ND                  | ND              | ND                     | ND                             |
| <i>tir1-1 afb2-3 afb3-4 afb4-8 afb5-5</i>                | Col-0          | embryo lethal        | NA                 | NA                        | NA      | NA                  | NA              | NA                     | NA                             |
| <i>afb1-3 afb2-3 afb3-4 afb4-8 afb5-5</i>                | Col-0          | -                    | -                  | 10%                       | +++     | ++++                | ++              | +                      | ++++                           |
| <b><i>afb1-3 afb2-1 afb3-4 afb4-8 afb5-5</i></b>         | Col/Ws (8xCol) | -                    | -                  | ND                        | ND      | ND                  | ND              | ND                     | ND                             |
| <b><i>afb1-3 afb2-1 afb3-1 afb4-8 afb5-5</i></b>         | Col/Ws (8xCol) | -                    | -                  | ND                        | ND      | ND                  | ND              | ND                     | ND                             |
| <i>tir1-1 afb1-3 afb2-3 afb3-4 afb4-8 afb5-5</i>         | Col-0          | embryo lethal        | NA                 | NA                        | NA      | NA                  | NA              | NA                     | NA                             |
| <b><i>tir1-10 afb1-3 afb2-3 afb3-4 afb4-8 afb5-5</i></b> | Col/Ws (9xCol) | embryo lethal        | NA                 | NA                        | NA      | NA                  | NA              | NA                     | NA                             |
| <b><i>tir1-10 afb1-3 afb2-1 afb3-4 afb4-8 afb5-5</i></b> | Col/Ws (9xCol) | embryo lethal        | NA                 | NA                        | NA      | NA                  | NA              | NA                     | NA                             |

**Summary of phenotypes for mutant combinations.** For the quantitative traits (Figure 1—figure supplement 4), the ranges for each of the phenotypes were divided into five bins, from “-” to “++++” in increasing severity. NA, Not applicable (embryo or seedling lethal); ND, not determined. The “% Rootless Embryo” column reflects the percent of rootless and inviable seedlings from plants grown at 20°C except where noted. The % Siliques Missing Valves column reflects those missing more than one-third of a valve ( $n = 53$  to 81).



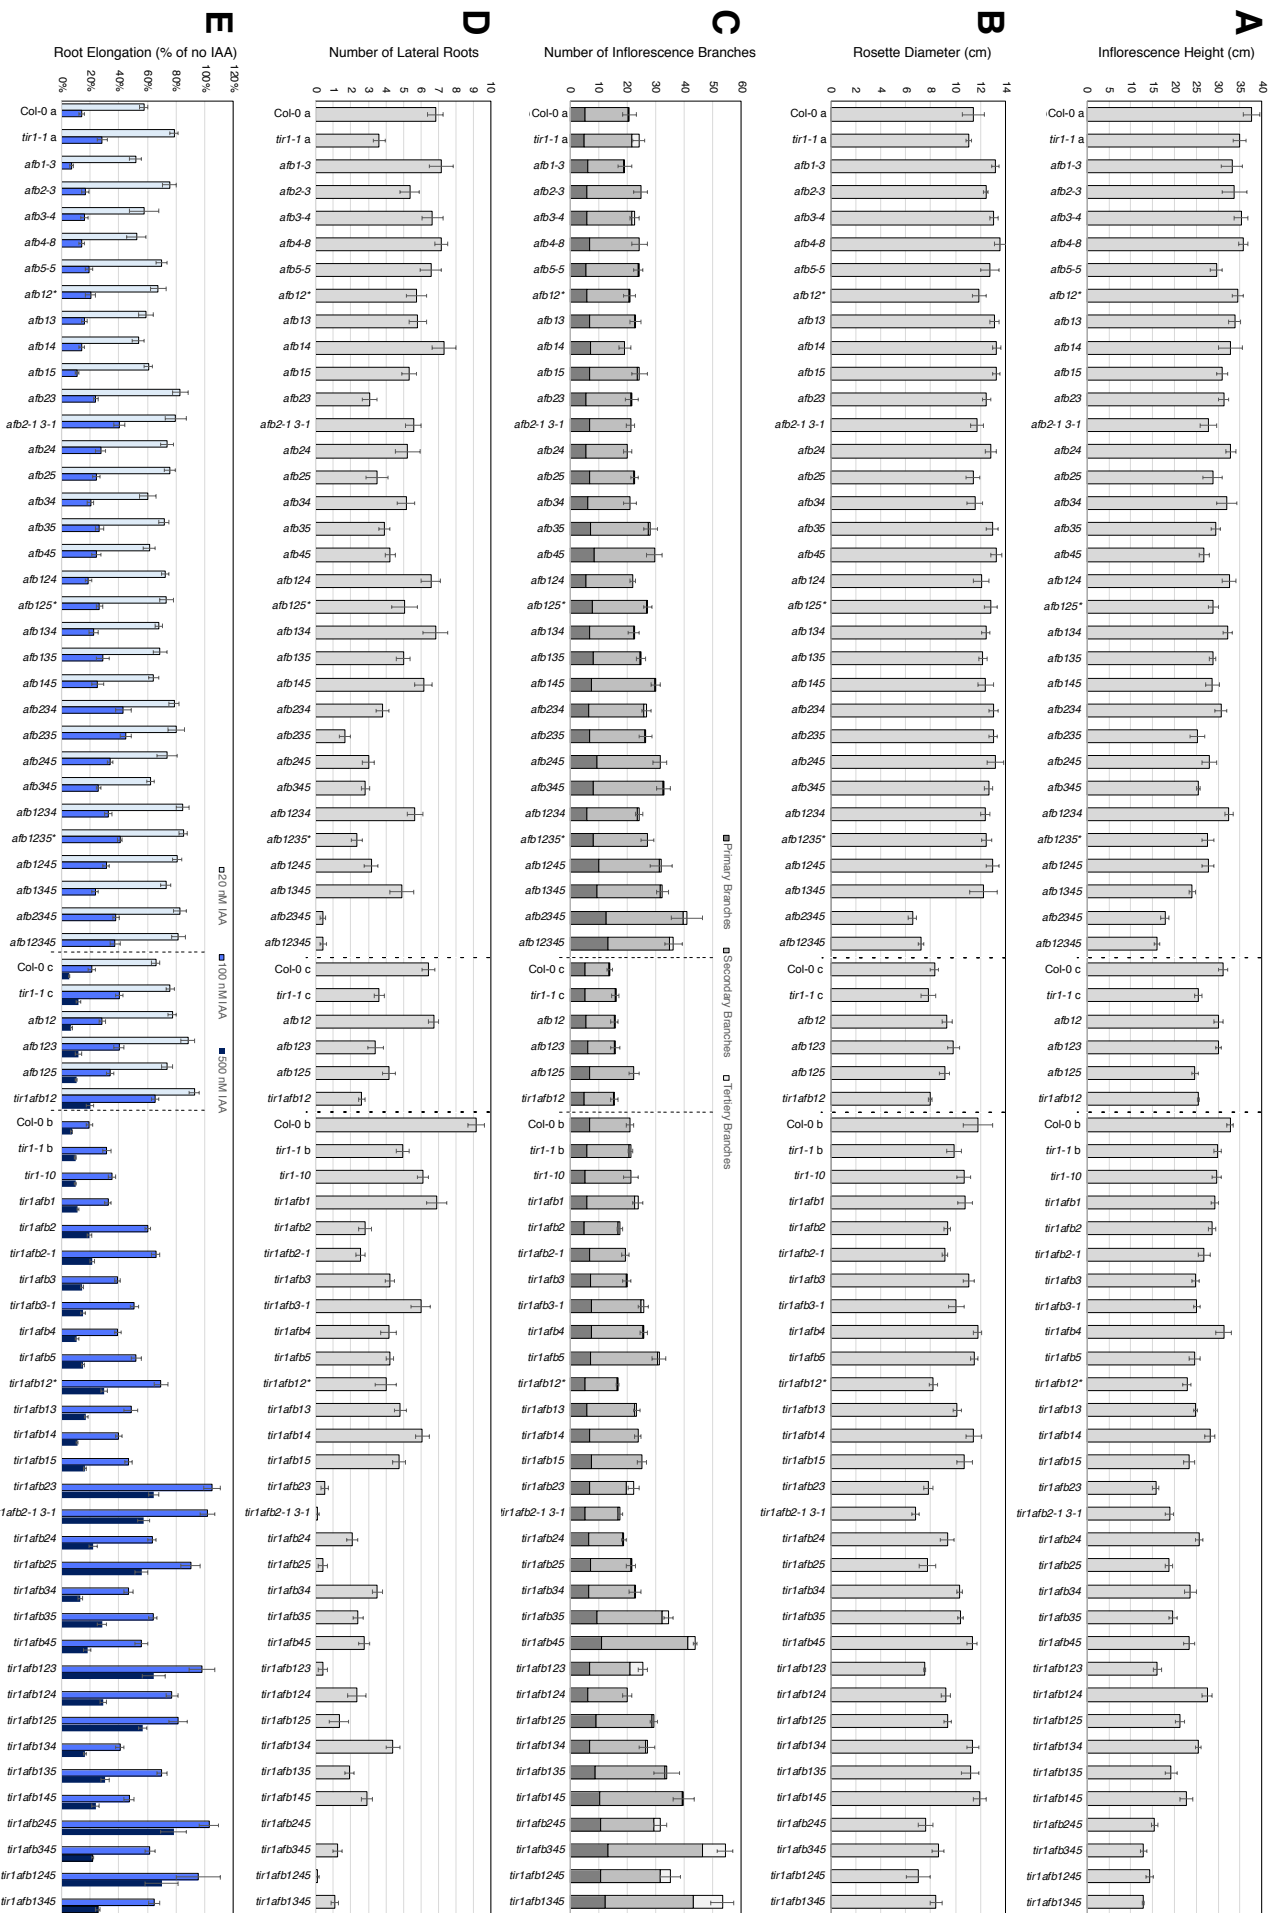

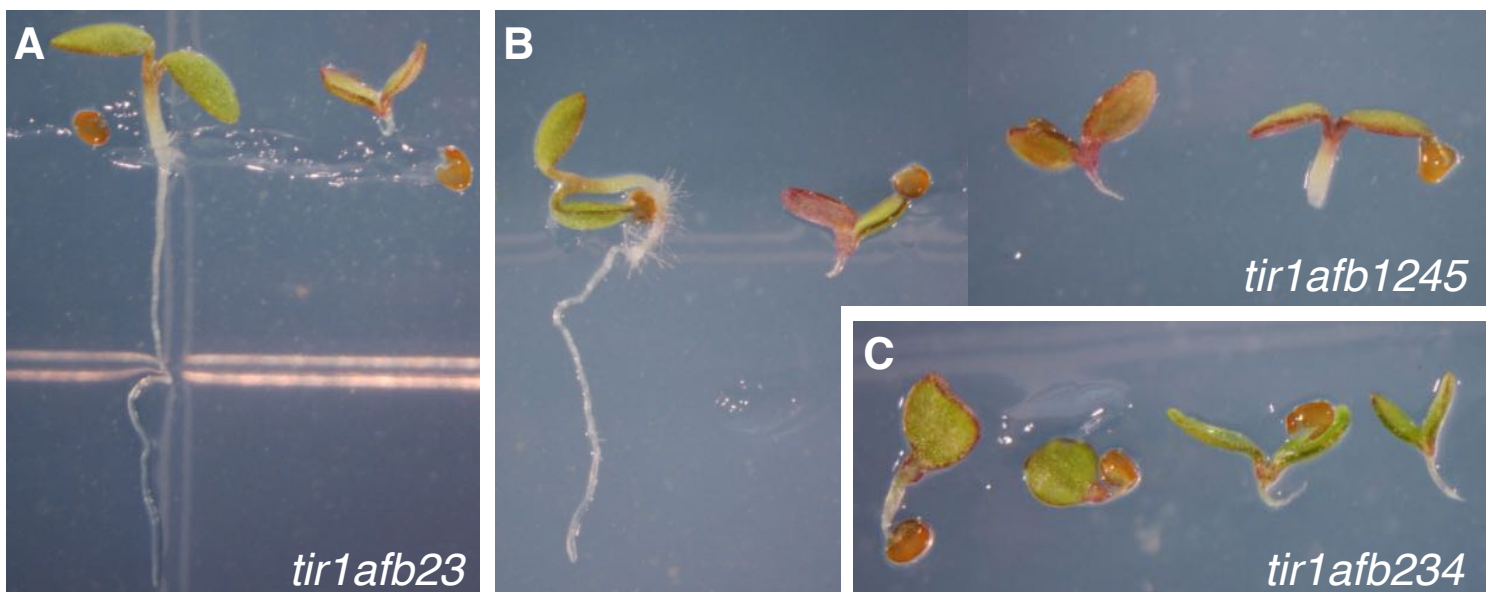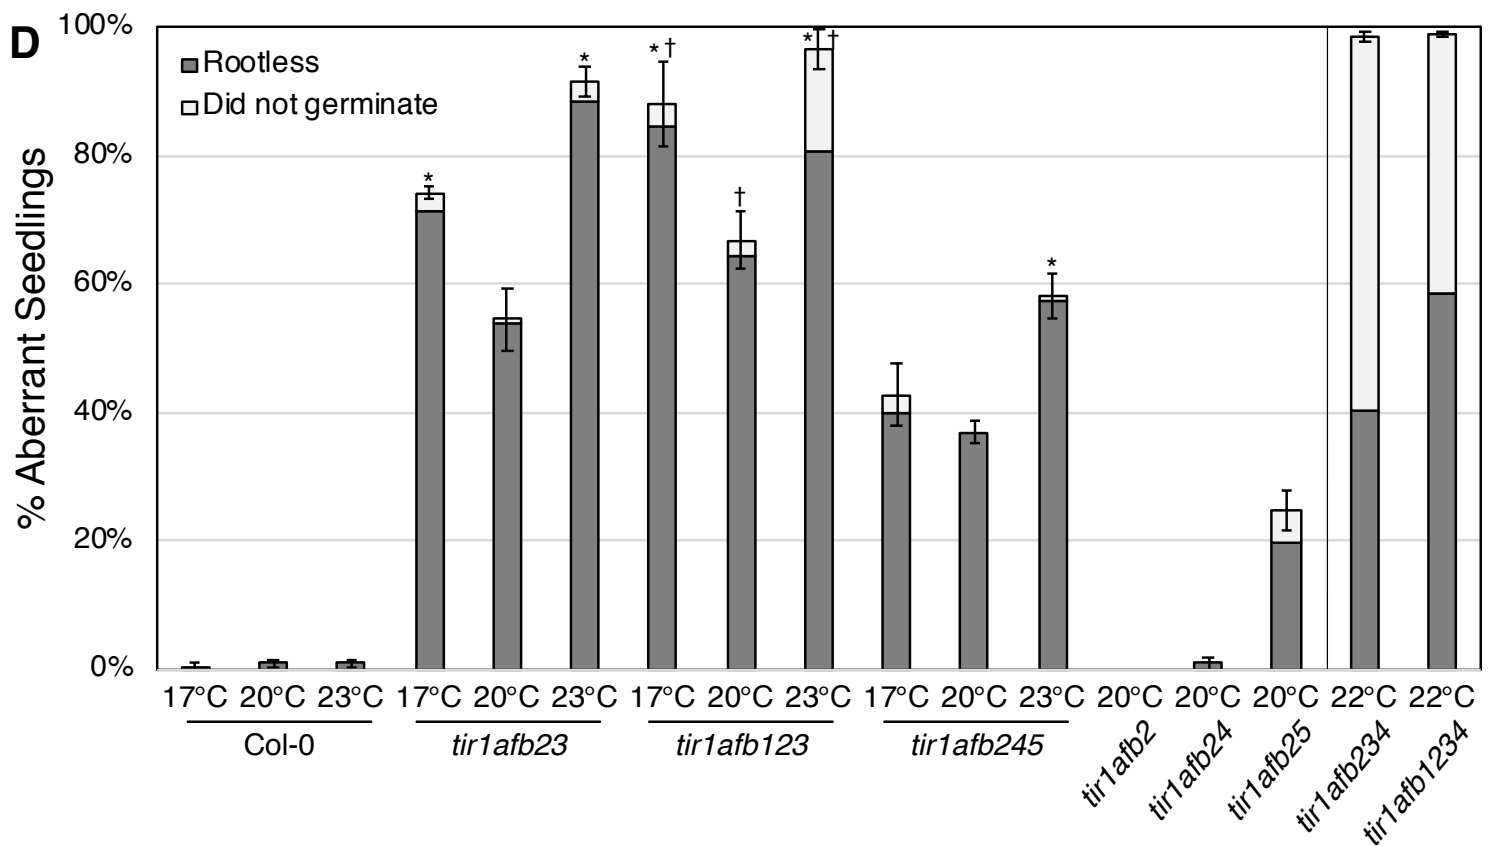

**Figure 1—figure supplement 5.** Embryonic root formation in *tir1/afb* mutants. **A**, representative seedlings of *tir1afb23* mutants with and without roots. **B**, four *tir1afb1245* seedlings with (left) and without roots (three on right), **C**, four rootless *tir1afb234* mutants. **D**, graph showing the percent of seedlings of different genotypes lacking roots (dark gray) or not germinating (light gray). The temperatures indicate the conditions in which the parents were grown, Percival growth chambers set to 17°C or 20°C or an environmental room with temperatures between 22°C and 23°C. For *tir1afb234* and *tir1afb1234*, adventitious roots needed to be induced with a 3-day treatment on 10  $\mu$ M NAA before transplanting to soil and growing for seed collection in a different Percival chamber set to 22°C. Error bars indicate standard error of the mean for progeny of four different parents of the given genotype/temperature combination. For the Fisher's exact tests, all four families' tallies were combined, from 142–255 seeds per genotype/condition were tested. \*, Different from 20°C for the same genotype using Fisher's exact test,  $p < 0.001$ . †, Different from *tir1afb23* using Fisher's exact test,  $p < 0.01$ .

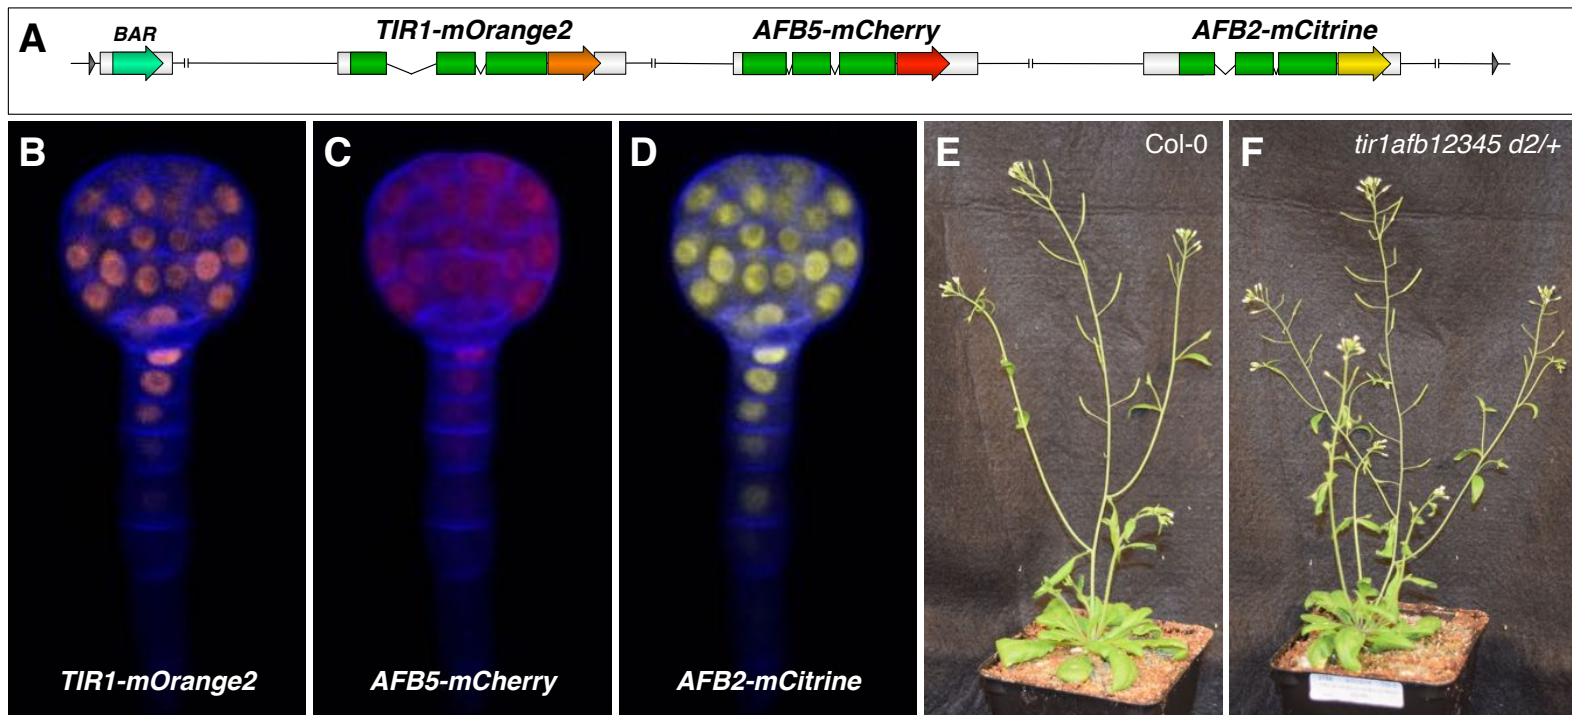

**Figure 3—figure supplement 1.** Transgene complementing the *tir1afb12345* sextuple mutant. **A**, diagram of the Transfer-DNA region of pMP1855 containing genomic regions of *TIR1*, *AFB5*, and *AFB2* fused to *mOrange2*, *mCherry*, and *mCitrine*, respectively. *BAR*, Basta- (phosphinothricin-) resistance gene flanked by the *Agrobacterium nopaline synthase* promoter and terminator. **B–D**, confocal images of a globular-stage embryo from a *TIR1/AFB5/AFB2* #*d2/d2* plant detecting *mOrange2* (**B**), *mCherry*, (**C**), and *mCitrine* (**D**). **E–F**, phenotypes of a 32-day-old WT Col-0 plant and a *tir1afb12345* plant hemizygous for the *TIR1/AFB5/AFB2* #*d2* transgene of the same age.



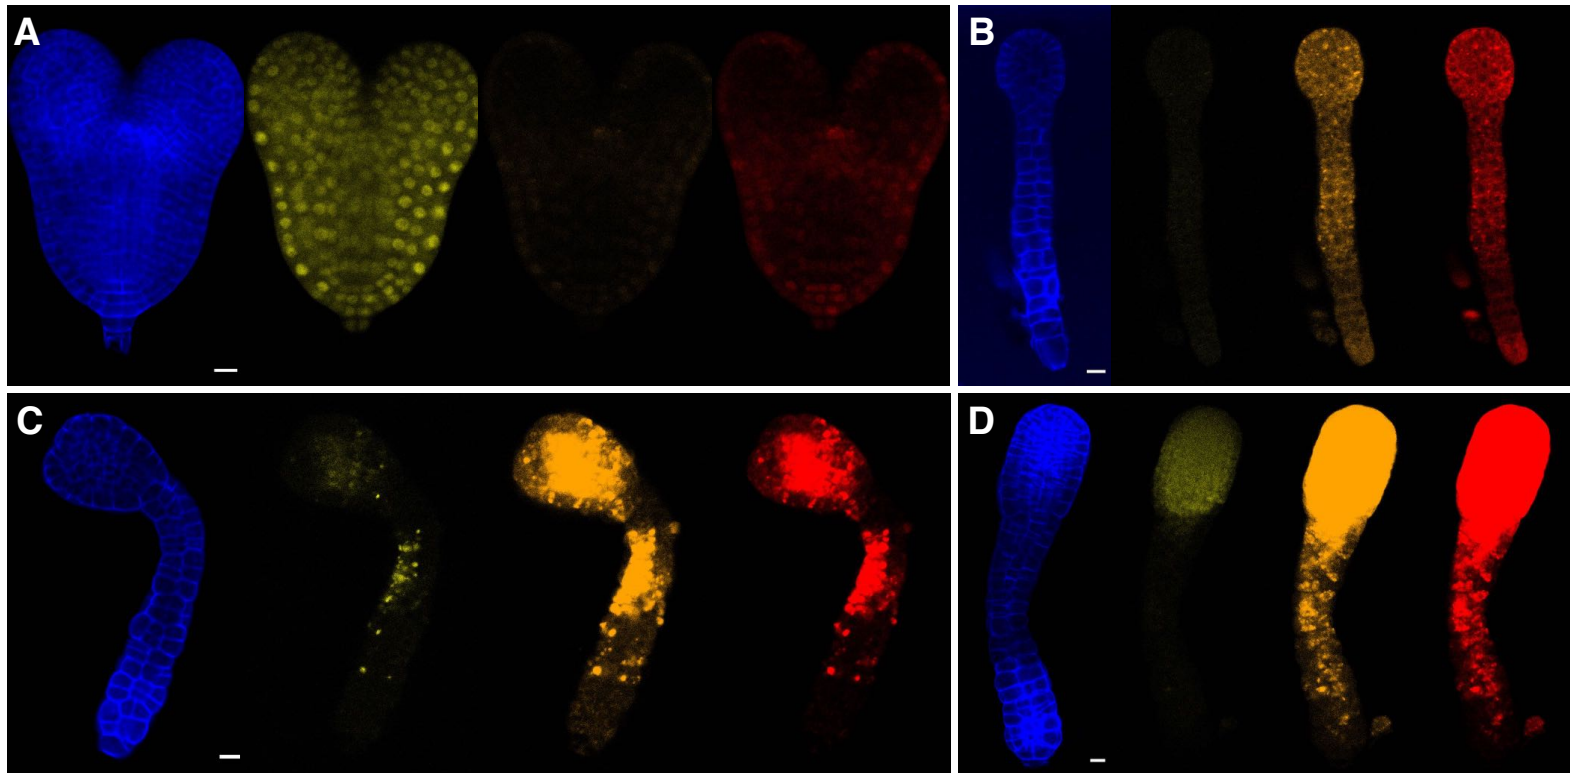

**Figure 3—figure supplement 2.** Appearance of autofluorescence in sextuple mutant embryos. Torpedo-stage transgene-complemented sextuple mutant (**A**) and sextuple mutants equivalent to between early torpedo to bent-cotyledon stages (**B–D**) were imaged using similar microscope settings for SR2200 stain (blue), mCitrine (yellow), mOrange2 (orange), and mCherry (red). In the mutants, autofluorescence appears in all three fluorescent protein channels in the same patterns albeit much less intensely in the YFP channel. The settings for YFP were much less sensitive than the others because AFB2-mCitrine was much brighter than TIR1-mOrange2 and AFB5-mCherry (likely due to dimmer fluorescent proteins with much slower maturation rates as well as lower expression levels). Scale bars are 10  $\mu$ m.

**Figure 3—figure supplement 3. Gamete transmission through the megagametophyte and pollen**

|                                                          | Parent | Genotype of gamete |              | <i>n</i> | $\chi^2$ | <i>p</i> |      |      |
|----------------------------------------------------------|--------|--------------------|--------------|----------|----------|----------|------|------|
|                                                          |        | Complemented (%)   | sextuple (%) |          |          |          |      |      |
| <b><i>TIR1/AFB5/AFB2-d2/+ tir1-1 afb2-3 afb1345</i></b>  | ♂      | 107                | 56%          | 84       | 44%      | 191      | 2.77 | 0.1  |
|                                                          | ♀      | 54                 | 56%          | 43       | 44%      | 97       | 1.25 | 0.26 |
| <b><i>TIR1/AFB5/AFB2-d2/+ tir1-10 afb2-1 afb1345</i></b> | ♂      | 118                | 46%          | 136      | 54%      | 254      | 1.28 | 0.26 |
|                                                          | ♀      | 133                | 51%          | 129      | 49%      | 262      | 0.06 | 0.8  |
| Combined                                                 | ♂      | 225                | 51%          | 220      | 49.4%    | 445      | 0.06 | 0.81 |
|                                                          | ♀      | 187                | 52%          | 172      | 47.9%    | 359      | 0.63 | 0.43 |

Plants of the given genotype were used in crosses to wild type (Col-0) as either the pollen donor (♂) or the recipient (♀). The progeny were sprayed with herbicide to identify F1 progeny inheriting the transgene. The Chi-squared tests compared the observed numbers of sextuple and complemented-sextuple gametophytes to the expected 1:1 ratio.

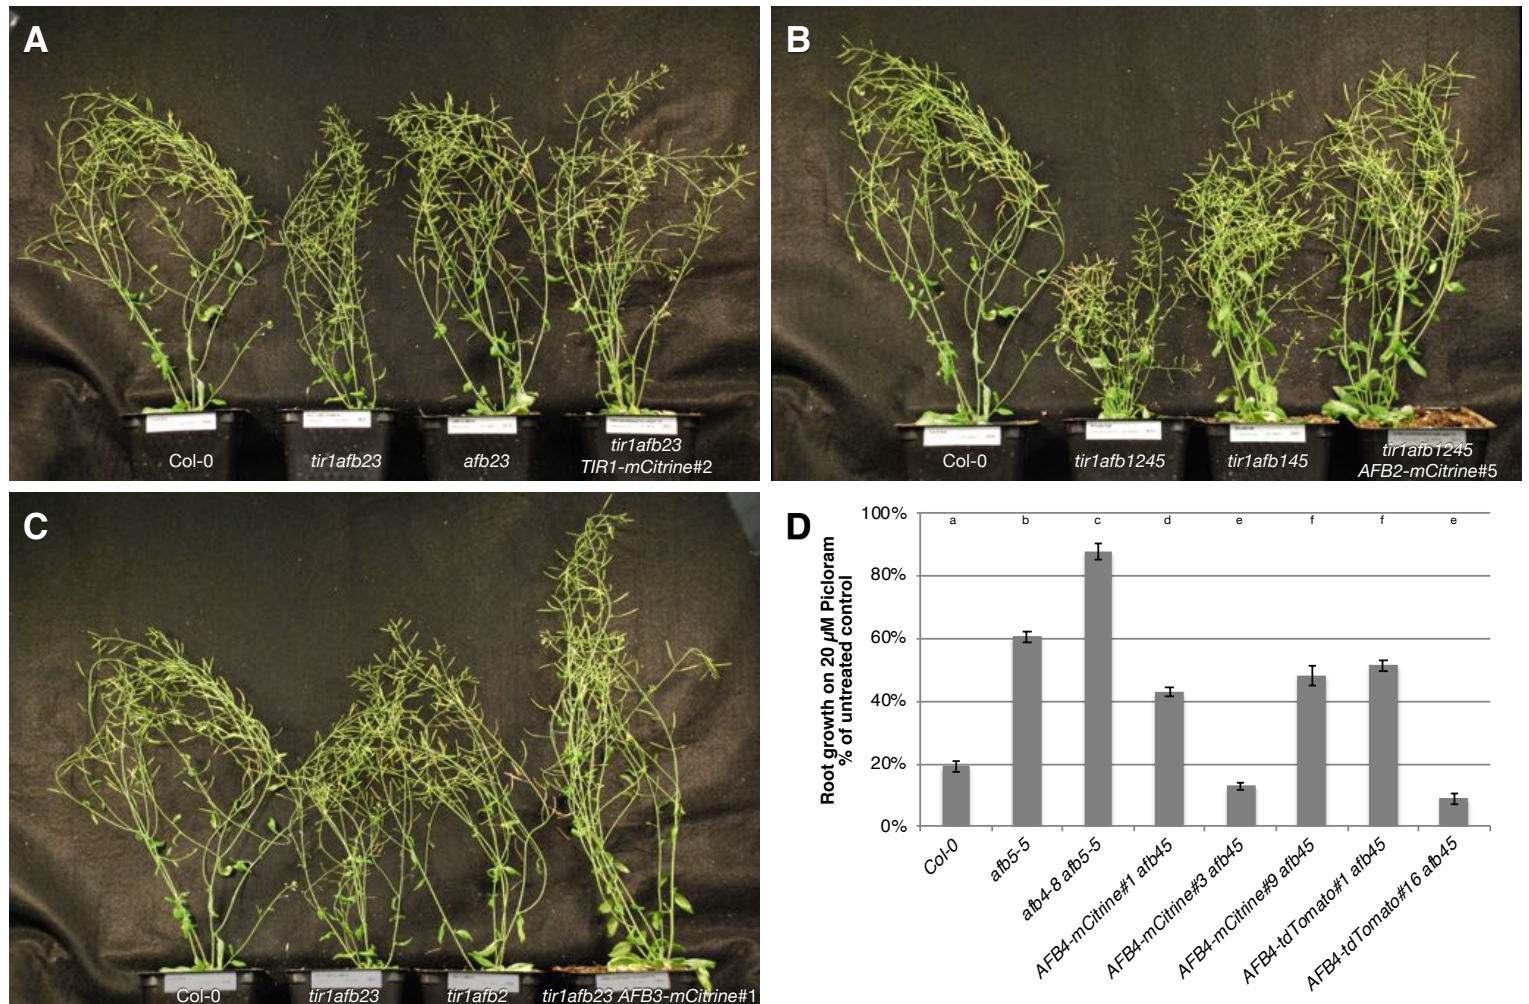

**Figure 5—figure supplement 1.** (A) Comparison of 42-day old Col-0, *tir1afb23*, *afb23*, and *tir1afb23* TIR1-mCitrine#2 plants. (B) Comparison of 42-day old Col-0, *tir1afb1245*, *tir1afb145*, and *tir1afb1245* AFB2-mCitrine#5 plant phenotypes. (C) Comparison of 42-day old Col-0, *tir1afb23*, *tir1afb2*, and *tir1afb23* AFB3-mCitrine#1 plant phenotypes. Each of the transgenes complements the silique and inflorescence height phenotypes. (D) Sensitivities of AFB4-expressing transgenic lines to picloram. Root elongation was measured for seedlings grown on media containing 20  $\mu$ M picloram, expressed as a percentage of elongation on media lacking picloram. Lines AFB4-mCitrine#3 and AFB4-tdTomato#16 are more sensitive to picloram than WT indicating that the transgene is likely expressed at higher levels than the endogenous AFB4 locus. Sample sizes were 15-16 per line per treatment. Error bars show the SE of the ratio. Letters at top distinguish lines with different responses to picloram (t-test,  $p < 0.05$ ).



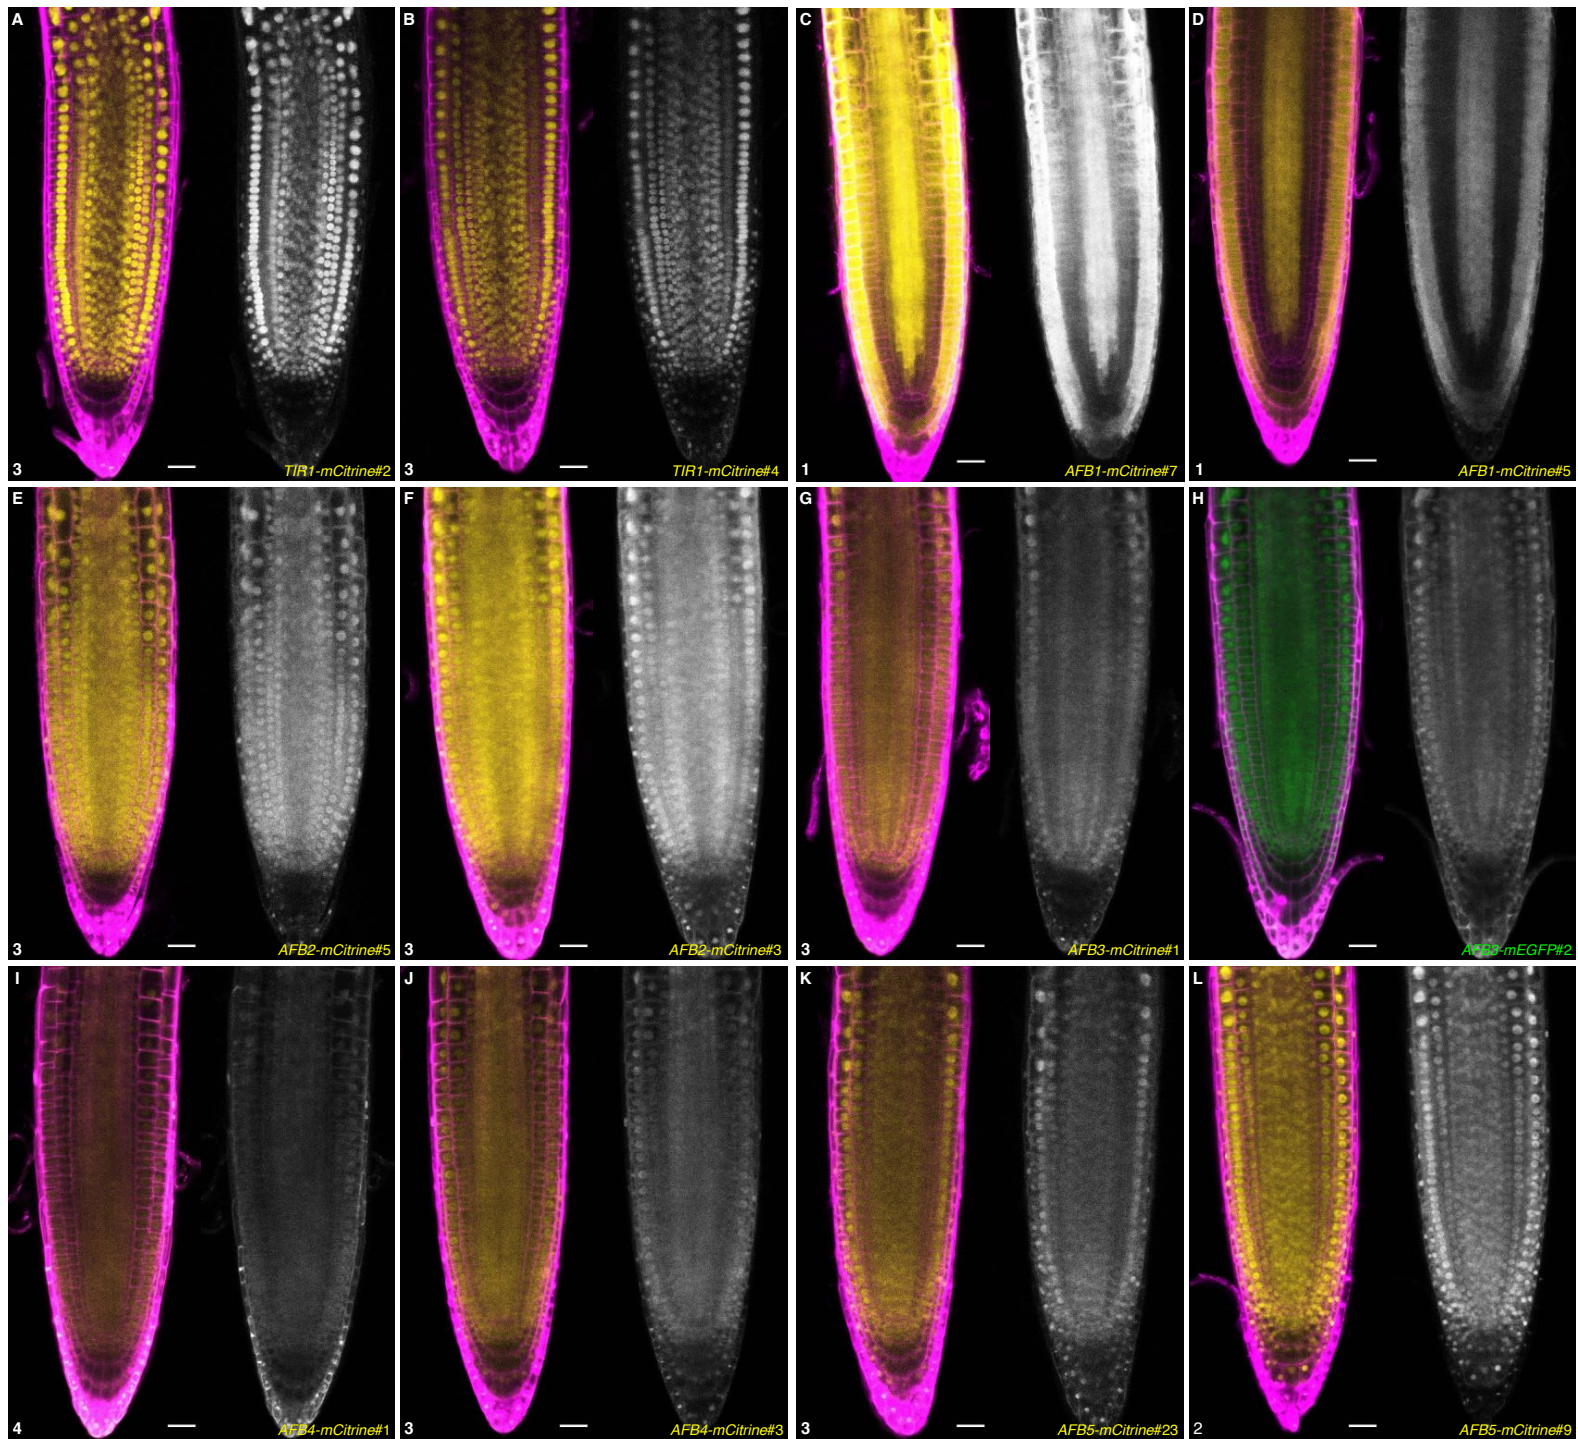

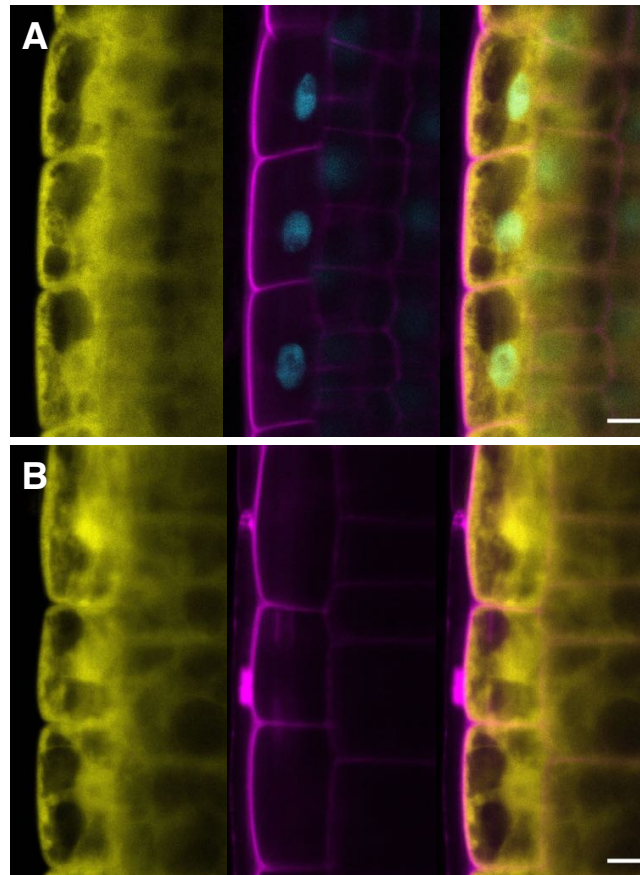

**Figure 5—figure supplement 3.** AFB1-mCitrine expression is unchanged in  $F_1$  hybrids used for signal quantification. Images of root epidermal cells in the elongation zone from 7-day-old seedlings are shown for the fluorescent signal of AFB1-mCitrine (yellow), propidium iodide (magenta) and mTurquoise2 (cyan), and a merged image. In panel **C**, the mTurquoise2 signal is included in cyan. **A**, *afb1-3 AFB1-mCitrine#7* × *UBQ10:H2B-2×mTurquoise2*  $F_1$  and **B**, *afb1-3 AFB1-mCitrine#7*. Scale bars equal 10  $\mu\text{m}$ .

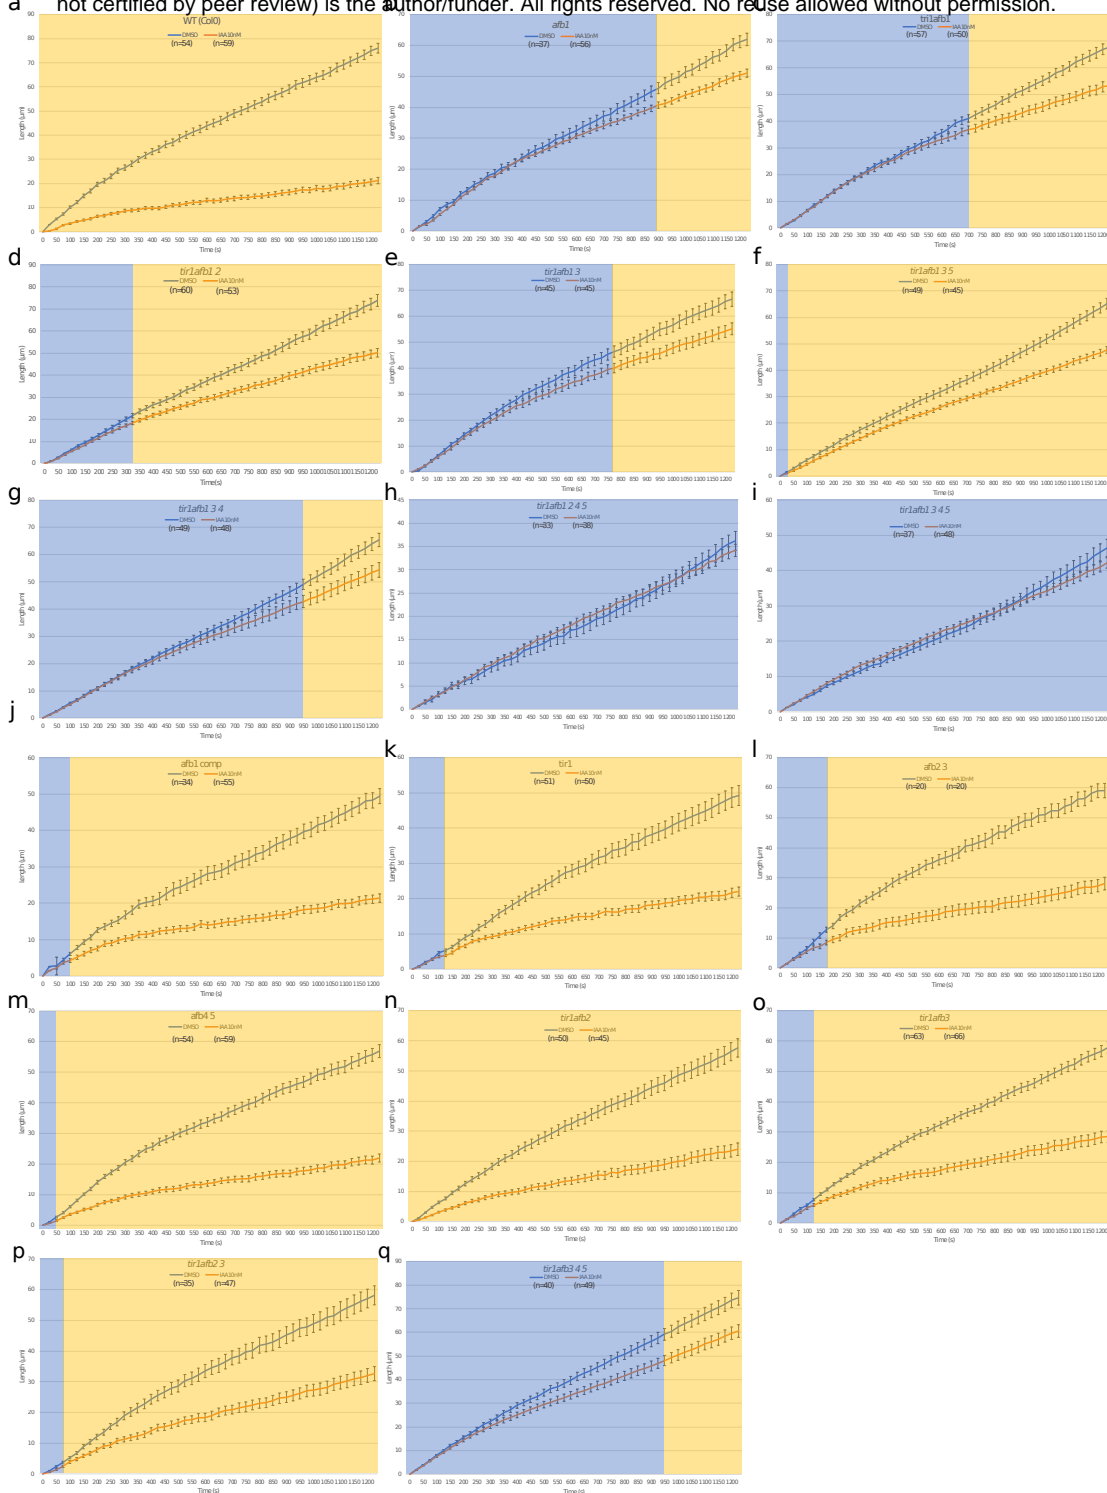

**Figure 6—figure supplement 1.** Time courses of root elongation. Graph of the root length in  $\mu\text{m}$  versus time in seconds with DMSO and 10 nM IAA treatments (blue and orange lines, respectively) in wild type (a), *afb1* (b), *tir1afb1* (c), *tir1afb12* (d), *tir1afb13* (e), *tir1afb135* (f), *tir1afb134* (g), *tir1afb1245* (h), *tir1afb1345* (i), *afb1 AFB1-mCitrine#7* (j), *tir1* (k), *afb23* (l), *afb45* (m), *tir1afb2* (n), *tir1afb3* (o), *tir1afb23* (p), *tir1afb23* (p), *tir1afb345* (q). Bars indicate standard deviation of the mean (SEM). Blue region indicates no differences between the length of treated and non-treated conditions while pale orange indicates significant difference according to two ways *t*-test ( $p = 0.05$ ). n indicates the number of roots imaged in three independent experiments.

**Figure 6—figure supplement 2.** Movie of wild type root tip with mock (DMSO, left panel) and 10 nM IAA (right panel) treatments. Images were acquired every 25 seconds for 20 minutes. Scale bar 100  $\mu\text{m}$ .

**Figure 6—figure supplement 3.** Movie of *afb1-3* root tip with mock (DMSO, left panel) and 10 nM IAA (right panel) treatments. Images were acquired every 25 seconds for 20 minutes. Scale bar 100  $\mu\text{m}$ .



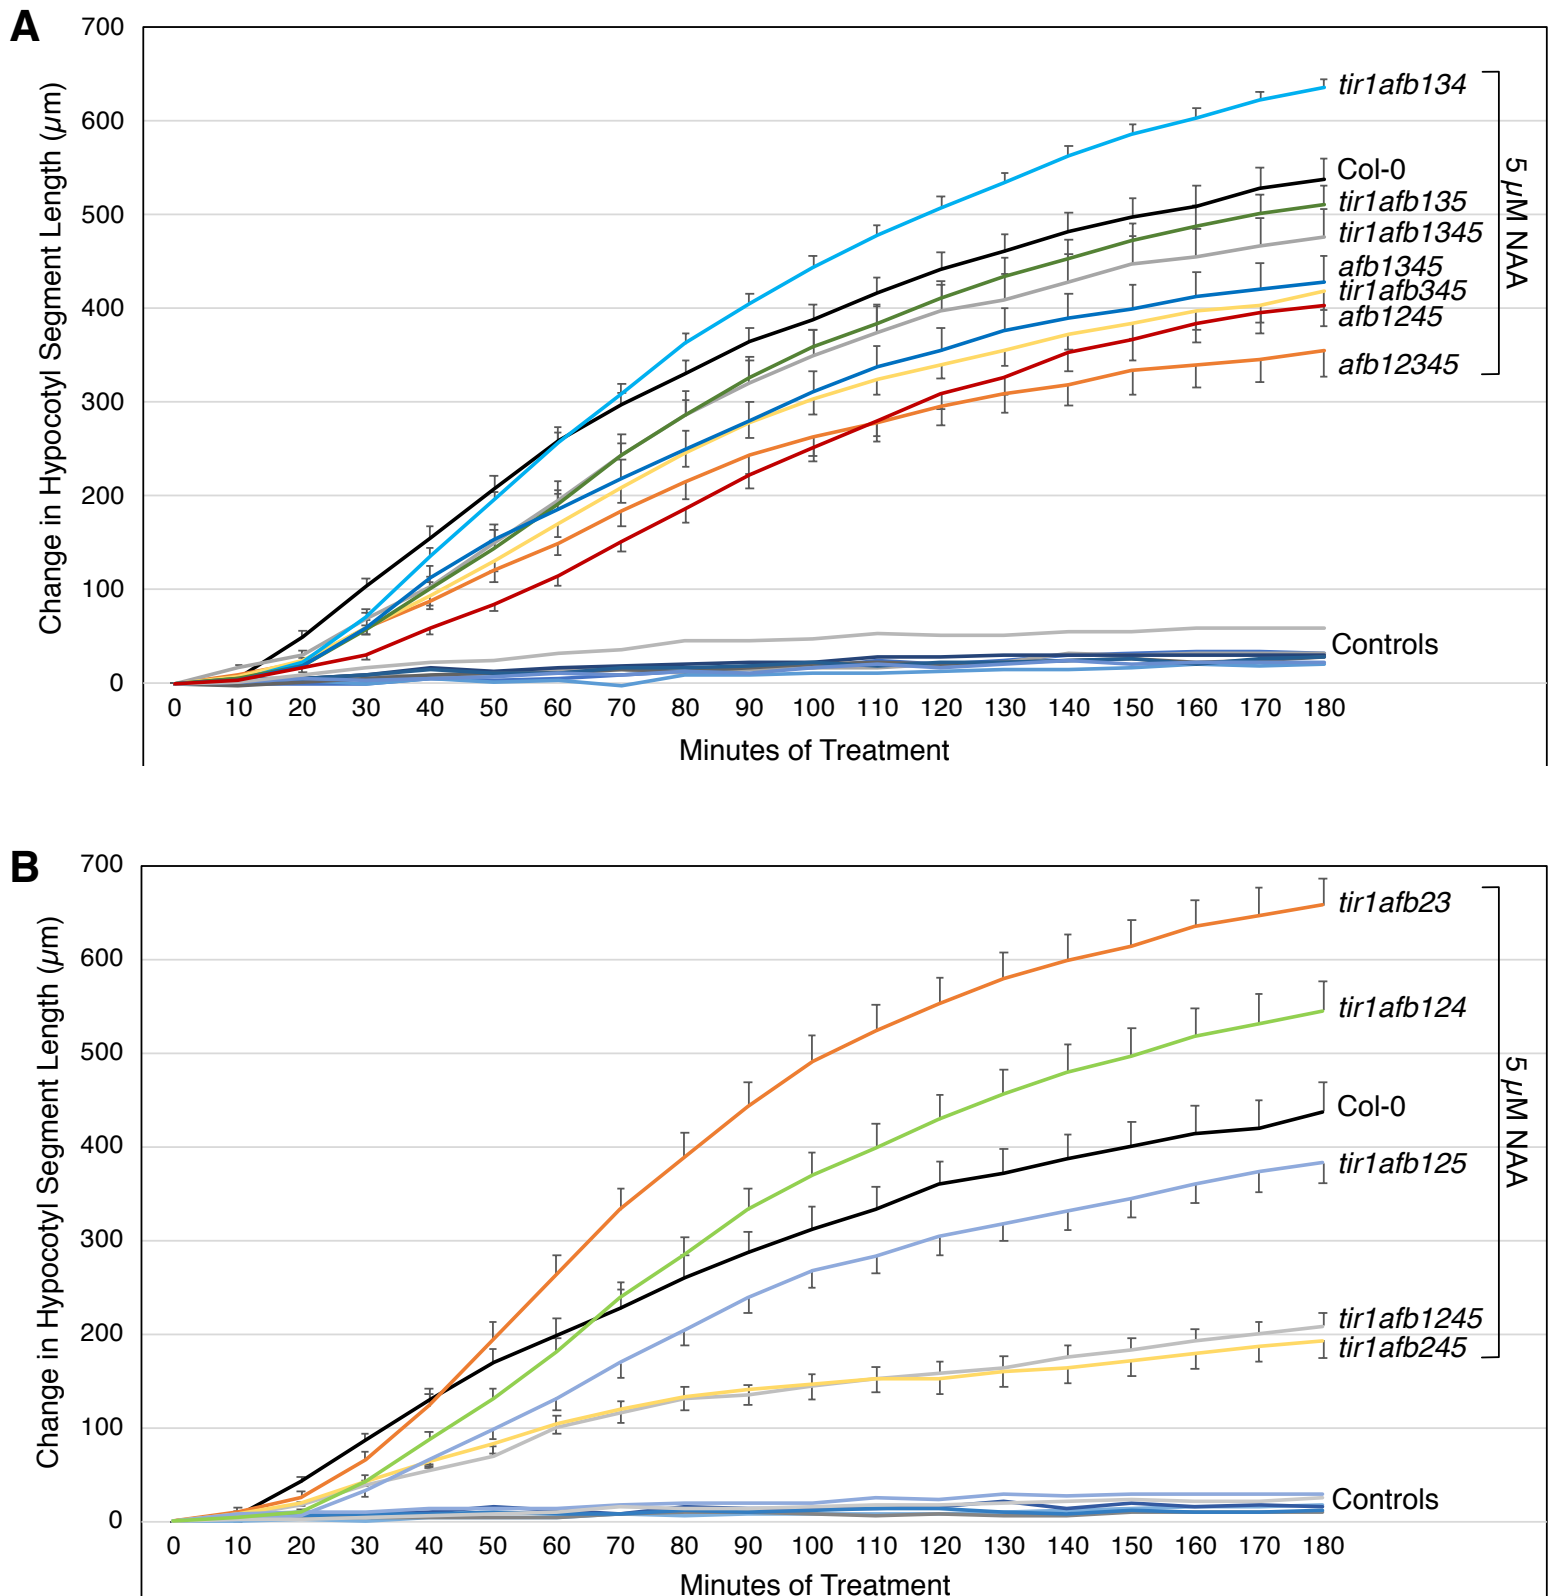

**Figure 6—figure supplement 4.** Graphs showing changes in length of hypocotyl segments treated with 5  $\mu\text{M}$  NAA or 0.025% ethanol (Controls) for three hours. The genotypes shown on the right correspond to the nearest curve with NAA treatment at the 180 minute timepoint. The curves for the control treatment are not labeled. Error bars show standard error of the mean. For pairwise  $t$ -test  $p$  values for each treated genotype at each time point, see Supplemental File 5. The experiments shown in panels **A** and **B** were done on different days.



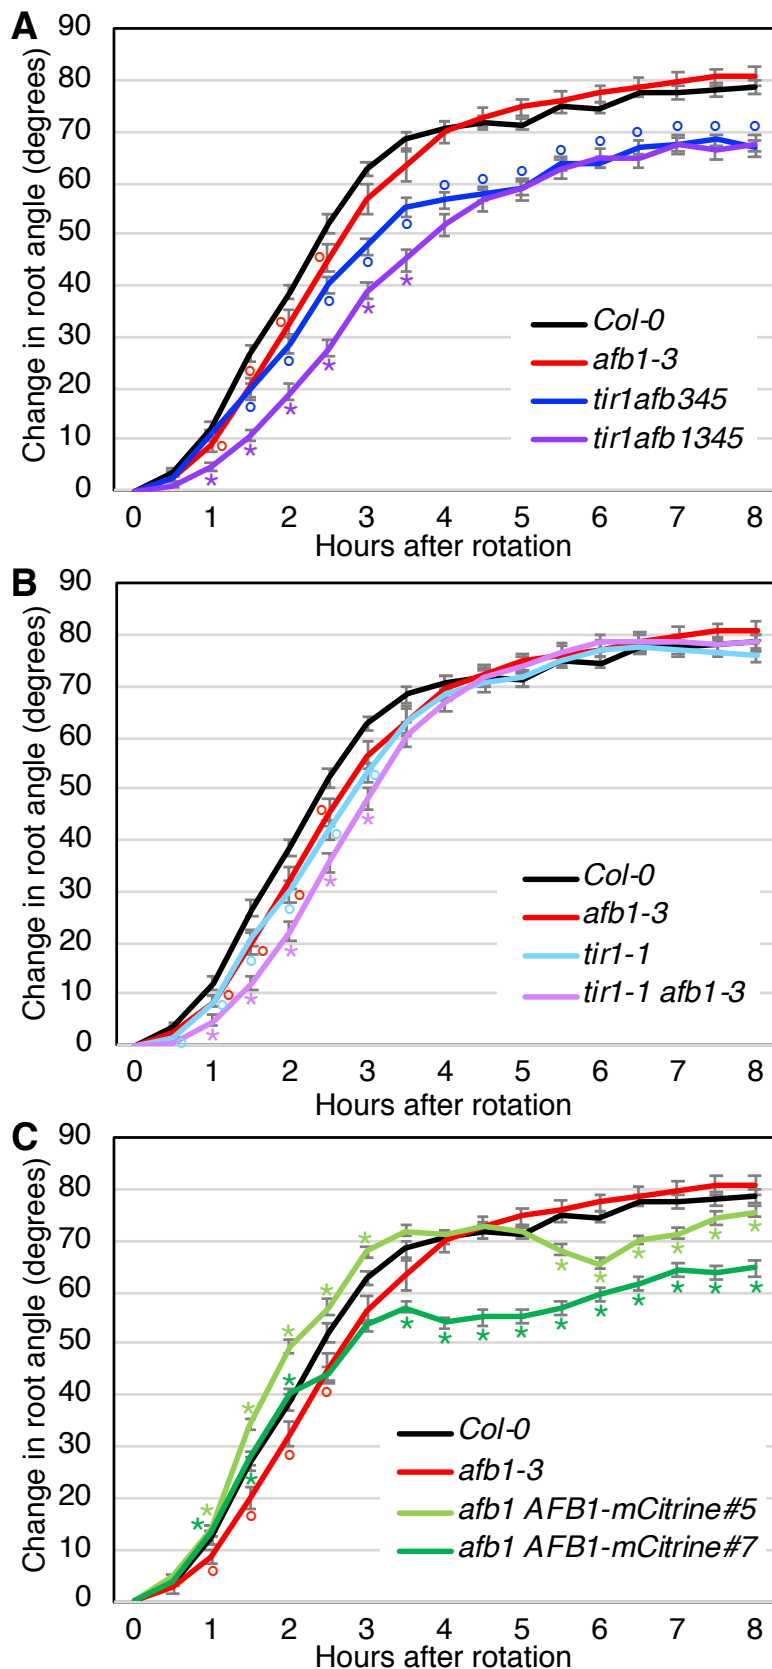

**Figure 7—figure supplement 1.** Gravitropic response of *tir1/afb* lines, repeat experiment. Seedlings for each line were imaged every 30 minutes after rotating the plates 90° and the mean difference in the root-tip angle from the original angle  $\pm$  SEM are plotted versus time. *Col-0* and *afb1-3* are included in all panels for comparison. Time points at which lines differed from *Col-0* are indicated by degree symbols (°) and differences between lines with and without the *afb1* mutation or an *AFB1-mCitrine* transgene are indicated by asterisks (\*) of the colors shown in the legend (*t*-test,  $p < 0.05$ ). Colors (sample size): black, *Col-0* (33); red, *afb1-3* (24); blue, *tir1afb345* (42); purple, *tir1afb1345* (41); cyan, *tir1-1* (39); lavender, *tir1-1 afb1-3* (40); light green, *afb1-3 AFB1-mCitrine#5* (39); and dark green, *afb1-3 AFB1-mCitrine#7* (41).
